1

Article

2 **Long title:**

3 **Mutators as drivers of adaptation in pathogenic bacteria and a risk factor for host jumps and vaccine**  
4 **escape: insights into evolutionary epidemiology of the global aquatic pathogen *Streptococcus iniae***

5 **Short title:**

6 **Mutators as a risk factor for host jumps and immune escape in pathogenic bacteria**

7

8 **Oleksandra Silayeva<sup>1,2</sup>, Jan Engelstaedter<sup>1</sup>, and Andrew C Barnes<sup>1,2\*</sup>**

9 <sup>1</sup>The University of Queensland, School of Biological Sciences and <sup>2</sup>Centre for Marine Science, St Lucia  
10 Campus, Brisbane, Queensland 4072, Australia

11

12

13 **Key words: mutators; DNA repair; pathogen evolution; immune escape, vaccination; Streptococcus;**  
14 **aquaculture; host jumps, zoonoses**

15

16 **\*Correspondence:**

17 **[a.barnes@uq.edu.au](mailto:a.barnes@uq.edu.au)**

18

19 **Abstract**

20 Hypermutable strains (mutators) occur via mutations in DNA repair genes and facilitate microbial  
21 adaptation as they may rapidly generate stress-resistance mutations. Bacterial mutators deficient in  
22 mismatch repair (MMR) and oxidised guanine repair (OG) are abundant in clinical settings, however  
23 their role in epidemiology and evolution of virulence remains poorly understood. Here we determine  
24 phylogenetic relationship among 80 strains of *Streptococcus iniae* isolated globally over 40 years using  
25 non-recombinant core genome single nucleotide polymorphisms (SNPs), estimate their mutation rate  
26 by fluctuation analysis, and identify variation in major MMR (*mutS*, *mutL*, *dnaN*, *recD2*, *rnhC*) and OG  
27 (*mutY*, *mutM*, *mutT*) genes. We find that *S. iniae* mutation rate phenotype and genotype are strongly  
28 associated with phylogenetic diversification and variation in major streptococcal virulence  
29 determinants (capsular polysaccharide, hemolysin, cell chain length, resistance to oxidation, and biofilm  
30 formation). Furthermore, profound changes in virulence determinants observed in mammalian isolates  
31 (atypical host) and vaccine-escape isolates found in bone (atypical tissue) of vaccinated barramundi are  
32 linked to multiple MMR and OG variants and unique mutation rates. This implies that adaptation to  
33 new host taxa, to new host tissue, and to immunity of a vaccinated host is facilitated by mutator  
34 strains. Our findings highlight the importance of mutators and mutation rate dynamics in evolution of  
35 pathogenic bacteria, in particular adaptation to a drastically different immunological setting that occurs  
36 during host jump and vaccine escape events.

37

## 38 Introduction

39 Optimal mutation rates in microbial populations are determined by a trade-off between maintenance  
40 of genetic integrity and evolvability (Stich, et al. 2010; Ferenci 2015). High fidelity of DNA repair is  
41 advantageous in adapted populations since most mutations lead to deviation from the evolved  
42 phenotype (Stich, et al. 2010; Sniegowski and Raynes 2013). Conversely, lower fidelity of DNA repair  
43 can be advantageous under stressful conditions since increased mutation supply promotes diversity  
44 and may thereby accelerate adaptation (Stich, et al. 2010; Wielgoss, et al. 2013). Bacteria can efficiently  
45 fluctuate between high and low mutation regimes: While extremely low mutation rates are maintained  
46 in favourable conditions (Wielgoss, et al. 2011), elevation of mutation rates known as stress-induced  
47 mutagenesis (SIM) occurs in adapting populations (Galhardo, et al. 2007; Sundin and Weigand 2007).  
48 SIM is associated with temporary hypermutability during SOS response and increased frequency of  
49 heritable hypermutable strains (mutators) (Galhardo, et al. 2007; Sundin and Weigand 2007). Mutators  
50 periodically arise within a population via mutations in DNA repair genes (Miller 1996; Boe, et al. 2000)  
51 and become prevalent under stress as, in a clonal population, mutator alleles ‘hitchhike’ with beneficial  
52 mutations that arise at increased rate in the mutator genetic backgrounds (Mao, et al. 1997; Taddei, et  
53 al. 1997). When adaptation is gained, low mutation rate can be restored via anti-mutator compensatory  
54 mutations (Wielgoss, et al. 2013).

55 Mutator strains are abundant among bacterial clinical isolates, especially in chronic cases (Hall and  
56 Henderson-Begg 2006; Oliver 2010). Multiple studies have attributed this to antibiotic selection (Negri,  
57 et al. 2002; Matsushima, et al. 2010; Wang, et al. 2013), since mutators are a well-established risk  
58 factor for the development of antimicrobial resistance (Blazquez 2003; Chopra, et al. 2003). However,  
59 the association between frequency of mutators in diagnostic samples and antibiotic treatments is weak  
60 (Gutierrez, et al. 2004; Mena, et al. 2008), and isogenic knockout mutator strains have increased ability  
61 to colonize an animal host in challenge models devoid of antibiotic exposure (Giraud, et al. 2001;  
62 Nilsson, et al. 2004; Healey, et al. 2016). Thus, the prevalence of mutators in clinical isolates most likely  
63 results from the selective process during adaptation to the host (Labat, et al. 2005; Mena, et al. 2007;  
64 Mena, et al. 2008; Oliver and Mena 2010), where immunity acts as the ultimate selective pressure  
65 shaping the diversity of pathogenic strains (Aquino and Nunes 2016). The ‘Immunological niche’  
66 concept states that, due to the diversity and complexity of immune responses, every individual host  
67 represents a unique habitat that requires adaptation (Cobey 2014). Increased mutation supply in a  
68 mutator strain could allow rapid adjustment to the particular immunological environment found within  
69 each host. Considering that the pathogen needs to adapt to every new host, the host population taken  
70 as a whole represents an extremely heterogeneous environment where adaptive processes are ongoing  
71 and persistence of mutator alleles is favoured (Lukacisinova, et al. 2017). The fitness of a pathogenic

72 strain in the host hinges on the concept of virulence (the degree of damage to the host), which is a  
73 dynamic, complex trait determined by a multitude of virulence factors and host responses (Methot and  
74 Alizon 2014). Optimal virulence is a trade-off between acuteness and persistence with higher virulence  
75 facilitating extraction of resources and transmission, but too much damage can kill the host and stop  
76 transmission altogether (Mackinnon and Read 2004). Additionally, virulence factors are often antigens  
77 so reduced virulence may be a means of immune evasion (Deitsch, et al. 1997). Consequently, both loss  
78 and gain of virulence may be advantageous, and indicate adaptive shifts towards acute or chronic  
79 pathogenesis, respectively (Maurelli 2007; Shrestha, et al. 2014). Exacerbation and attenuation of  
80 virulence factors are repeatedly observed in both knockout and naturally occurring mutators (Picard, et  
81 al. 2001; Merino, et al. 2002; Smania, et al. 2004; Mena, et al. 2007; Gonzalez, et al. 2012; Canfield, et  
82 al. 2013). Thus, it appears that mutator strains/alleles may help pathogenic bacteria to evolve towards  
83 the optimal level of virulence.

84 Most bacterial mutators isolated from human clinical samples are deficient in genes from mismatch  
85 (MMR) and oxidised guanine (OG) DNA repair systems (Hall and Henderson-Begg 2006). MMR and OG  
86 genes are conserved across all domains of life (Fukui 2010), and single nucleotide polymorphisms in  
87 their sequence may produce drastic alterations in mutation rate (Rajanna, et al. 2013; Dai, et al. 2015).  
88 Nonetheless, these genes appear to be variable in major bacterial pathogens, confirming a potential  
89 role of mutation rate dynamics in the evolution of virulence (Ambur, et al. 2009; Chen, et al. 2010).  
90 MMR is coupled to replication and removes mispaired nucleotides as well as short insertion/deletion  
91 loops, and prevents recombination between divergent sequences (Li 2008; Tham, et al. 2013). The MMR  
92 pathway has been extensively characterised in *Escherichia coli*, where the MutS dimer protein interacts  
93 with the replication processivity clamp DnaN (b-clamp), binds to the mismatch, recruits MutL, and the  
94 MutS:MutL complex then activates the MutH endonuclease (Fukui 2010). MutH cuts the unmethylated  
95 nascent strand at hemimethylated d(GATC) sites. MutL loads the UvrD helicase that unwinds the nicked  
96 DNA containing the error, which is followed by excision by one of the single-strand nucleases (Fukui  
97 2010). This MMR organization, however, appears to be limited to *E. coli* and closely related  
98 Gammaproteobacteria (Fukui 2010; Lenhart, et al. 2016). In most bacteria and eukaryotes, MutH is  
99 absent and MutL has a conserved endonuclease site, dam methylase (acting at GATC sites) is absent  
100 and the strand discrimination signal is unknown (Fukui 2010; Lenhart, et al. 2016). Studies in *Bacillus*  
101 *subtilis*, a model species for gram-positive bacteria, suggest that nicks created by ribonuclease *rnhC*  
102 during removal of misincorporated ribonucleosides direct MutL endonuclease towards the newly  
103 synthesised strand, and that recD2 acts as a MMR helicase instead of uvrD (Lenhart, et al. 2016). The  
104 OG system repairs oxidative DNA damage throughout the cell cycle (Lu, et al. 2001; David, et al. 2007).  
105 Among all DNA bases, guanine is most sensitive to reactive oxygen species and its oxidised form, 8-oxo-

106 dG or OG, is highly mutagenic as it preferentially pairs with adenine which, if not corrected, leads to G:C  
107 to A:T transversion on a second round of replication (Lu, et al. 2001; David, et al. 2007). OG system  
108 organization is conserved in most bacteria and eukaryotes and generally MutT homologs remove 8-oxo-  
109 dG from the nucleotide pool, MutM homologs excise 8-oxo-dG incorporated into DNA, and MutY  
110 homologs remove adenine from OG:A mispairings (Lu, et al. 2001; David, et al. 2007).

111 The present study investigates the role of mutators and mutation rate dynamics in the epidemiology  
112 and evolution of pathogenic bacteria using the broad host-range pathogen *Streptococcus iniae*. *S. iniae*  
113 is a highly adaptable species, evidenced by its global distribution, ability to cross divergent host taxa  
114 boundaries and repeated re-infection of previously immunised hosts during disease outbreaks (Agnew  
115 and Barnes 2007; Millard, et al. 2012). Moreover, Streptococcal pathogens in general are difficult  
116 candidates for immunisation in humans and animals due to high strain diversity evidently driven by  
117 immunisation, yet there is little information on the role of mutators in this evolutionary process  
118 (Croucher, et al. 2011; Croucher, et al. 2013). We determine variation in mutation rate and identify  
119 mutations in MMR (*mutS*, *mutL*, *dnaN*, *recD2*, *rnhC*) and OG (*mutY*, *mutM*, *mutT*) genes among 80  
120 diverse strains of *S. iniae* and discover that they correlate with phylogenetic diversification but are  
121 highly conserved within phylogenetic clades. To identify whether this adaptive process might be driven  
122 by the host immune response we identify variation in major phenotypic traits that determine virulence  
123 in streptococci (capsular polysaccharide, hemolysin, length of cell chains) and bacteria in general  
124 (resistance to reactive oxygen species (ROS), and biofilm formation). *S. iniae* polysaccharide capsule and  
125 the beta-hemolysin streptolysin S both increase survival under host immune response via reduction of  
126 phagocytic killing and other mechanisms (Locke, Colvin, Datta, et al. 2007; Locke, Colvin, Varki, et al.  
127 2007; Kadioglu, et al. 2008; Rajagopal 2009) However, both are antigens that induce antibody  
128 production and development of immune memory (Kadioglu, et al. 2008; Rajagopal 2009). In addition,  
129 both capsule production and hemolysin activity have many implications that are not fully understood  
130 (Kadioglu, et al. 2008; Geno, et al. 2015). For example, non-encapsulated strains exhibit greater ability  
131 to adhere to and colonize an epithelium (Hammerschmidt, et al. 2005). Length of cell-chains is also  
132 linked to virulence in streptococci: shorter chains are associated with acute infection and increased  
133 survival in the blood as they are less likely to activate the complement, whilst longer chains promote  
134 adherence and colonization (Rodriguez, et al. 2012). As pathogenic bacteria are continuously exposed  
135 to reactive oxygen released by immune cells, resistance to oxidative compounds contributes to  
136 virulence in pathogens allowing them to avoid immune clearance (Hegde, et al. 2008; Andisi, et al.  
137 2012). Biofilm formation is also generally associated with virulence in bacteria; detached cells are  
138 associated with acute infections whereas biofilm aggregates are a hallmark of chronic conditions  
139 (Bjarnsholt 2013). The expression of these traits among *S. iniae* isolates is highly consistent with

140 phylogenetic affiliation, which confirms that strain diversity is primarily driven by adaptation to the host  
141 achieved via adjustment of virulence. Furthermore, we find that occurrence of abnormal virulence  
142 determinants is strongly associated with number of mutations in MMR and OG genes and occurrence of  
143 infection in unusual immunological landscapes such as mammals and bone tissue of immunised fish.  
144 These data support the critical role of mutators in adaptation to the host and evolution of virulence,  
145 and suggest that these strains may facilitate the reinfection of immunised animals and transmission  
146 between divergent host species.

147

## 148 Results and Discussion

149 High mutation rates are costly due to inevitable accumulation of deleterious changes. Once adaptation  
150 is gained the mutator strain is predicted to evolve back towards a low mutation rate (de Visser 2002),  
151 most likely via compensatory, ‘anti-mutator’ mutations in DNA repair genes (Turrientes, et al. 2013;  
152 Wielgoss, et al. 2013). Considering this volatility of mutator phenotypes, their involvement in  
153 adaptation cannot be accurately assessed by *de facto* presence among sporadic isolates, as the latter  
154 might have already (partially or fully) adapted and restored a lower mutation rate. However, mutator  
155 and anti-mutator mutations that cause adaptive fluctuations in the fidelity of DNA repair could be  
156 identified in the genotype of an adapted strain. Also, after loss and gain of functional DNA repair alleles,  
157 the mutation rate of an evolved strain is not likely to be exactly the same as before adaptation.  
158 Consequently, variation in DNA repair genes and mutation rate determined phenotypically by  
159 fluctuation analysis might indicate adaptation via a mutator state when placed in a phylogenetic  
160 context.

161 Our work investigates the link between mutation rate genotype and phenotype and phylogenetic  
162 diversification among *Streptococcus iniae* strains isolated globally between 1976 and 2016 from  
163 different host taxa. Maximum likelihood phylogenetic analysis of 80 *S. iniae* isolates (Table 1) based on  
164 non-recombinant core genome SNPs derived from whole genome data resolved 6 major clades (A-F),  
165 one lineage with two strains (clade G), and three lineages with a single strain (Figure 1). Clades C-E are  
166 endemic; and clades A, B, and F contain strains from diverse geographic regions. Principally, variation in  
167 MMR and GO genes occurs only between the lineages, and they are highly conserved within clades  
168 (Figure 2, Table 2). In fact, sequence of the major MMR and GO genes is conserved even within  
169 phylogenetic groups not readily definable by geographic origin, time, or host species, and these genes  
170 appear to be good candidates for Multilocus Sequence Typing (MLST, identification of phylogenetic  
171 position based on selected genes as opposed to a whole genome analysis). Although even synonymous  
172 SNPs in any gene locus could affect mRNA and have pronounced phenotypic consequences (Shabalina,  
173 et al. 2013), most SNPs were identified in protein functional domains, and most amino acid  
174 substitutions were predicted to have a deleterious effect on protein function (Table 2). Further, the  
175 number of MMR and GO variants correlates significantly with mutation rate ( $p = 0.0056$ ) and with the  
176 number of atypical phenotypic traits contributing to virulence ( $p = 0.0331$ ), as predicted by a  
177 Phylogenetic Generalised Least Squares regression model that accounts for autocorrelation occurring  
178 between closely related strains (Symonds and Blomberg 2014). In turn, mutation rate is highly  
179 consistent with phylogenetic affiliation and, according to multiple pair-wise strain comparisons by  
180 Maximum Likelihood Ratio test (Zheng 2015), mutation rate difference is classified as insignificant  
181 within but significant between major phylogenetic lineages (Figure 1, 2). Although mutation rate

182 variation between divergent strains is significant, the magnitude of the differences is modest (largely  
183 around 5-fold) (Figure 1, 2), which is consistent with mutator phenotype transience and restoration of  
184 low mutation rate in adapted populations. Clade A might be a dominant circulating strain as it has  
185 persisted globally for almost two decades (Clade A contains strains isolated from USA, Honduras, and  
186 Australia between 1999 to 2016) primarily infecting closely related Perciform fish (barramundi (*Lates  
187 calcarifer*), tilapia (*Oreochromis sp*), jade perch (*Scortum barcoo*)). Mutation rate in all isolates along the  
188 ancestral lineage (total of 35 strains) falls within  $1.5 - 2 \times 10^{-8}$  range (Fig 1, 2; clade A), which is similar to  
189 the base mutation rate estimated for other non-mutator gram positive bacteria (Hall and Henderson-  
190 Begg 2006; Gould, et al. 2007), and all the differences are insignificant except three pairwise  
191 comparisons that verge on commonly accepted significance level. MMR and GO genes in these strains  
192 are identical, and only minor deviations from wildtype traits contributing to virulence were observed  
193 among the strains (absence of capsule production and longer cell chains in QMA0158, 216) (Figs. 1-3).  
194 The rest of the lineages express significantly different mutation rates (except strains from clade C1 and  
195 QMA0445-46 discussed below), contain unique and often multiple SNPs in *mut* genes, and show  
196 peculiar phenotypic variants related to virulence (Figures 2, 3). Although phylogenetic relatedness  
197 between lineages is fully resolved, they originate almost simultaneously and nested lineages evolve  
198 independently sharing little phylogenetic history (Figure 1,2). Lack of correlation between branch length  
199 and sampling date derived by root-to-tip regression analysis with time is good evidence of non-neutral  
200 evolution amongst this collection of *S. iniae* isolates ( $R^2=0.0936$ , Correlation coefficient 0.306, best-fit  
201 root; Supplementary Figure 1)(Rambaut, et al. 2016). Deviation from a neutral model is also supported  
202 by highly skewed branching in the tree, with some branches comprising single isolates whilst others  
203 comprise many epidemiologically unrelated isolates (Figure 1, 2). This is suggestive of frequent strong  
204 selection, presumably imposed by heterogeneity of the immune landscape encountered during transfer  
205 between host individuals, and resembles genealogical tree topology derived from viral evolution over  
206 similar timespans (Bedford, et al. 2011; Neher and Hallatschek 2013) although we acknowledge tree  
207 topology may also be affected by sampling bias.

208 Clade B contains QMA0084, a strain isolated from a black flying fox, *Pteropus alecto*, in Western  
209 Australia (WA) and two strains isolated from ornamental fish (clown loach or tiger botia, *Chromobotia  
210 macracanthus*) in USA. These isolates share valine to isoleucine substitution in MutL, a synonymous SNP  
211 in *recD2*, and 56 bp deletion within the promoter of *mutY*. The latter mutation is predicted to drastically  
212 changes *mutY* transcription pattern, affecting transcription factor binding sites of the original promoter  
213 and introducing a second promoter downstream. It appears that transcription is also affected by the  
214 rest of the genetic background as isolates exhibit significant difference in mutation rate phenotype,  $7 \times  
215 10^{-8}$  in QMA0084 and  $4 \times 10^{-8}$  in clown loach strains. Phenotypically, clade B has shifted towards



216 decreased haemolytic activity. Clade B shares a common ancestor with clade C comprised of strains  
217 obtained from barramundi farmed in WA, Northern Territory (NT) (nested clade C1), and north QLD fish  
218 farms (nested clade C2). While a core mutation rate of  $1.5\text{-}2 \times 10^8$  is observed in clade C1, a  
219 significantly higher mutation rate of  $7 \times 10^8$  has been maintained in sister clade C2 from north QLD for  
220 almost two decades (1995 to 2012) (Fig 1). We speculate that the latter might be attributable to  
221 difference in meteorological conditions: periodic heavy rainfall present in tropical north QLD is likely to  
222 bring fluctuations in water salinity and temperature, creating an unstable environment where adaptive  
223 processes are ongoing and high mutation rate is advantageous. Minor variation in virulence-related  
224 phenotypes (absence of capsule production and longer cell chains in QMA0074, 77)(Fig 2), are  
225 supportive that mutation rate evolution in this lineage might be driven by outside-the-host factors. The  
226 significant difference in mutation rate between nested clades C1 and C2 is potentially attributable to  
227 variation in *dnaN*: A predicted deleterious tyrosine to isoleucine substitution (Table 2, PROVEAN score -  
228 2.216) is present in all isolates of C2, which may explain the high mutation rate phenotype in clade C2  
229 strains (which also have a synonymous variant in *recD2*)(Fig. 2, Table 2). Indeed, deletion of *dnaN1* in  
230 *Bacillus anthracis* results in a mutator phenotype with equivalent mutation rate to a *mutS* mismatch  
231 repair-defective strain, supportive of the connection between deleterious mutation in DnaN and  
232 mutator phenotype found here (Yang and Miller 2008). Moreover, the T326I substitution in *S. iniae*  
233 clade C2 DnaN occurs in one of the critical residues of the loader binding interface of the  $\beta$ -clamp,  
234 which may impede interaction with MutS. While MutS can perform mismatch repair independently of  
235 DnaN in *B. subtilis*, 90% of mismatch repair is dependent on targeting MutS to nascent DNA via the  
236 DnaN clamp zone (Dupes, et al. 2010; Lenhart, et al. 2013). In contrast the T1135C nucleotide  
237 substitution in the *dnaN* stop codon is unique to clade C1 strains and changes stop codon TAA into CAA  
238 coding for glutamine, with the next stop codon TAG found immediately downstream. This mutation  
239 does not appear to affect mutation and was not predicted to have any effect on the encoded protein  
240 function (Table 2) via single amino acid protein elongation (Korkmaz, et al. 2014) producing a mutation  
241 rate that is insignificantly different from the core rate found in clade A (Fig 2). Clade D consists of  
242 isolates from trout (*Oncorhynchus mykiss*) from Réunion and Israel. These strains have an estimated  
243 mutation rate of  $5 \times 10^8$ , contain a glutamate to aspartate substitution in *mutM* predicted to be  
244 deleterious to protein function, a synonymous SNP in *RecD2*, and exhibit impeded haemolytic activity  
245 (Fig 1,2, Table 2).

246 Isolates from humans and related fish strains are found in clade E where multiple phenotypic variants  
247 contributing to virulence are observed. This clade contains two nested subclades that share a SNP in  
248 *mutS*, but have other unique SNPs and different mutation rates, which is significant in most pairwise  
249 comparisons. Subclade E1 contains USA isolates from human (QMA0133-35, 37-38) and hybrid striped

250 bass (QMA0447-48), which have a substitution in the Shine-Dalgarno sequence of *recD2* and a mutation  
251 rate of  $6.5 \times 10^{-8}$  (Fig 1, Table 2). Fish strains and three human strains (QMA0135, 37-38) show a  
252 decreased ability to form cell chains and an elevated ability to withstand oxidative stress. Two human  
253 strains QMA0133-34 form somewhat thicker and considerably denser biofilm structures. QMA0133 is  
254 non-encapsulated, and QMA0134 appears to differentially express the capsular polysaccharide in a  
255 culture. The close phylogenetic relationship presented here implicates a likely transfer from farmed  
256 hybrid bass to humans (Facklam, et al. 2005), and this host jump may have been facilitated by the  
257 mutator phenotype. Subclade E2 contains two human strains from Canada (QMA0130-31) and tilapia  
258 strain from USA (QMA0466). These strains have unique methionine to isoleucine substitution at the N-  
259 terminus of the MutX, and mutation rate of  $4.5 \times 10^{-8}$  (Fig 1, Table 2). Both human strains are non-  
260 encapsulated (Fig 2). The tilapia strain expresses the capsule but forms short cell chains in common  
261 with most strains from the subclade (Fig 2). The close phylogenetic relationship again strongly  
262 implicates transfer from tilapia farmed in USA to human patients in Canada via import into the Toronto  
263 fish market (Weinstein, et al. 1997) and again, this host jump may have been facilitated by the mutator  
264 state. Clade F is not readily definable by location, time of isolation, or host species and comprises  
265 QMA0139 from unknown fish species obtained in Canada, QMA0190 isolated from snakehead murrel in  
266 Thailand (both of which appear on long branches), and a nested terminal clade comprised of  
267 barramundi isolates farmed in Recirculating Aquaculture Systems (RAS) in New South Wales and South  
268 Australia. The latter are of a particular interest as they were sampled from barramundi bone lesions  
269 during a disease outbreak in vaccinated fish where infection manifested itself as a slowly progressing  
270 osteomyelitis instead of typical acute septicaemia and meningitis (Agnew and Barnes 2007; Millard, et  
271 al. 2012). Since they are distant to strains used in autogenous vaccines in clade A (QMA0155-57, 160,  
272 QMA0250-52), the atypical outbreak might be classified as a case of vaccine-induced serotype  
273 replacement (VISR) – spread of co-existing pathogenic strain/s after elimination of the dominant  
274 strain/s targeted by the vaccine (Weinberger, et al. 2011). In contrast to natural populations where the  
275 investigation of VISR is confounded by ecological and sampling biases, and randomised vaccine trials  
276 that lack power to detect the population-wide effect of mass vaccination (Weinberger, et al. 2011),  
277 barramundi RAS represent a relatively controlled and isolated natural environment where vaccination  
278 against *S. iniae* fails occasionally but recurrently (Millard, et al. 2012). RAS are self-contained facilities  
279 with minimal water exchange and high standards of water treatment (Losordo, et al. 2009). This  
280 ensures that gene flow and, consequently, the probability of new serotype introduction after vaccine  
281 implementation is reduced to a minimum. A comparatively uniform immunized host population is  
282 exposed to dominant strains against which it was vaccinated along with potentially co-existing lineages  
283 in the RAS. In the atypical outbreaks in RAS in Australia, vaccine-induced immunity was partially

284 effective in the infected fish, evident by absence of proliferation of the new strain in typical niduses  
285 (blood, brain, and pronephros) and cross-reactivity of vaccine-induced antibodies against bone isolates  
286 (Millard, et al. 2012). This is in contrast with the classical model of serotype replacement where a  
287 vaccine is ineffective against the replacing co-existing strain. It has been postulated that VISR can occur  
288 even if the vaccine is equally efficient against all circulating strains via other trade-off mechanisms  
289 (Weinberger, et al. 2011). Apparently, evasion from immune clearance and adaptation to osseous  
290 tissue was allowed by shift towards attenuated virulence as suggested by multiple phenotypic changes  
291 in bone isolates: absence of capsular production, impeded hemolytic activity, increased cell-chain  
292 length, and denser biofilms. All of these changes have previously been associated with chronic infection  
293 and increased potential for colonization (Locke, Colvin, Datta, et al. 2007; Locke, Colvin, Varki, et al.  
294 2007; Kadioglu, et al. 2008; Andisi, et al. 2012; Rodriguez, et al. 2012; Bjarnsholt 2013; Geno, et al.  
295 2015), and only absence of polysaccharide capsule is shared with related QMA139 and QMA190, as well  
296 as QMA0140-41, QMA0187, and QMA0445-46, which implicates a non-encapsulated ancestor for these  
297 strains, and possibly clade E (assuming capsular production was regained in encapsulated strains found  
298 in this branch). Multiple SNPs in repair genes and the high mutation rate in bone isolates suggest that  
299 shift in virulence allowing persistence in the bone tissue might have occurred via mutator phenotype.  
300 Serine to arginine substitution in MutL and tyrosine to isoleucine substitution in MutY occur in the  
301 ancestor of QMA0139, QMA0190, and bone strains. Both substitutions are predicted to have a  
302 deleterious effect on protein function, but their effect on mutation rate is combined with unique SNPs  
303 found in each branch: QMA0139 has a SNP in the binding site of the DnaA transcription factor within  
304 the *dnaN* promoter, and a mutation rate of  $4.5 \times 10^{-8}$ , QMA0190 has synonymous SNP in *mutL* and  
305 mutation rate of  $6.5 \times 10^{-8}$ , and bone strains have glutamine to glycine substitution in MutS and  
306 synonymous SNP in *mutL*, and a mutation rate of  $3-4 \times 10^{-8}$ . Considering that the mutation rate of  
307 QMA0190 is significantly higher compared to rates expressed by QMA0139 and bone isolates, it is likely  
308 that variants unique to the latter strains compensate for deleterious variants shared by the isolates  
309 (Wielgoss, et al. 2013). However, fluctuation analysis in streptococci is intrinsically confounded when  
310 colonies in plate counts are formed by a cell chain rather than a single cell. Therefore, mutation rate of  
311 long-chained bone isolates might be proportionately underestimated in these experiments.

312 Clade G contains two strains from tilapia isolated in USA (QMA0445-46). Notably, despite being  
313 phylogenetically distant from clade A, these strains have the same MMR and GO genotype and have  
314 retained the core mutation rate and the wildtype virulence phenotype. The first long branch with a  
315 single isolate contains a strain from snakehead murrel strain (*Channa striata*) from Thailand. This isolate  
316 is non-encapsulated and weakly haemolytic and has a mutation rate of  $4.5 \times 10^{-8}$ , potentially  
317 attributable to deleterious aspartate to asparagine substitution in *rnhC* and SNP in the binding site of

318 *fnr* transcription factor within the *dnaN* promoter. A second long branch with a single strain contains  
319 the oldest among the analysed strains, QMA0140 isolated in 1976 from dolphin (*Inia geoffrensis*) (Pier  
320 and Madin 1976). This strain exhibits a mutation rate of  $1 \times 10^{-8}$ , which is unique among the strains and  
321 significantly lower than the core mutation rate, presumably associated with increased translation rate  
322 of recD2 helicase produced by a SNP in the ribosome binding site (Fig 2, Table 2). The longest branch on  
323 the tree contains a second dolphin strain, QMA0141, isolated two years later in 1978 (Pier, et al. 1978).  
324 This isolate is highly divergent from the rest of strains with around 20 kB of non-recombinant SNPs in  
325 pair-wise comparisons with other strains, accounting for around 1% genomic difference. In contrast to  
326 QMA140, it mutates at a rate of  $1 \times 10^{-7}$ , the highest mutation rate phenotype determined among the  
327 isolates and significantly different to the rest of the values. Multiple SNPs are observed in all MMR and  
328 GO genes: 3 in *dnaN* and *mutX*, 4 in *mutM*, 9 in *mutL* and *rnhC*, 15 in *recD2*, 9 in *mutL* and *rnhC*, and 68  
329 in *mutS*. Both dolphin isolates are non-encapsulated, show increased ability to withstand oxidative  
330 stress, and form denser and thicker biofilms (Fig 2, 3).

331 The conservation of *S. iniae* DNA repair genotypes and phenotype within phylogenetic clades and  
332 variation between the lineages is consistent with the idea of adaptive fluctuations in mutation rate  
333 being a driver of pathogen evolution, and their association with variation in virulence traits supports  
334 the contention that adaptive processes and diversification of pathogens are largely driven by host  
335 immunity. Moreover, infections in atypical hosts (mammals) and atypical tissues (bone) within  
336 apparently immune animals correlates strongly with the degree of deviation from the wildtype  
337 virulence phenotype ( $p=0.000$ ) and the number of variants in DNA repair genes ( $p=0.002$ ). This indicates  
338 that adaptation to a drastically different immunological landscape might be facilitated by elevated  
339 mutation supply permitting rapid adjustment of virulence and antigenicity, which has major  
340 epidemiological implications. First, mutators might facilitate pathogen transition among divergent host  
341 species known as 'host jumps', including to higher host taxa (eg. *Osteichthyes* and *Mammalia*) (Baumler  
342 and Fang 2013). Second, mutators might present a risk factor to immune escape after vaccination and  
343 serotype replacement. Moreover, as evidenced by *S. iniae* colonization of vaccinated barramundi bone  
344 described previously (Millard, et al. 2012), vaccine escape leading to serotype replacement might occur  
345 without major disruption of immune recognition when multiple changes attenuating virulence and  
346 antigenicity allow persistence in a tissue with lower immune surveillance.

347 To summarize, we estimate mutation rates among the strains by fluctuation analysis, identify the  
348 potential genetic bases for the observed differences by comparing MMR and GO genes and their  
349 regulatory regions, highlight correlating phenotypic changes associated with virulence, and interpret  
350 the data in a context of the phylogeny and the case histories of strain isolation. Our results highlight  
351 that mutators and mutation rate dynamics play a critical role in epidemiology of bacterial pathogens,

352 evolution of virulence and antigenicity, and emergence of new pathogenic strains and serotypes. In  
353 particular, mutators might associate with major adaptive events leading to colonization of a new  
354 host tissue, infection of novel host taxa, and survival in vaccinated hosts with specific adaptive  
355 immune response. Further experimental research involving isogenic MMR/GO gene knockout  
356 mutants is required to support our conclusions and determine how generalizable these findings are  
357 to other pathogens. It would be of particular interest to conduct similar studies in the  
358 *Pneumococcus* where serotype evolution following vaccination programmes is well documented,  
359 but the role of mutators in this process is not yet known (Croucher, et al. 2011; Croucher, et al.  
360 2013; Croucher, Kagedan, et al. 2015).

361

## 362 **Materials and methods**

### 363 **Strains and growth conditions**

364 Eighty isolates of *S. iniae* collected in Australia, USA, Canada, Israel, Honduras, and Thailand between  
365 1976 and 2016 from eight fish species (*Lates calcarifer*, *Scortum barcoo*, *Epalzeorhynchus frenatum*,  
366 *Epalzeorhynchus bicolor*, *Oreochromis sp.*, *Channa striata*, *Chromobotia macracanthus*, *Oncorhynchus*  
367 *mykiss*) and three mammalian species (*Homo sapiens*, *Inia geoffrensis*, *Pteropus alecto*) were used in  
368 this study (Table 1). Strains were received from culture collections, veterinarians, or directly from fish  
369 farms (Supplementary Table 1) and stored as master seed stocks without further subculture at -80°C in  
370 Todd-Hewitt Broth (THB) supplemented with 20% glycerol. Bacteria were routinely recovered from -  
371 80°C stocks on Columbia agar supplemented with 5% defibrinated sheep blood (Oxoid, Australia), and  
372 cultured at 28°C on Todd-Hewitt agar or in Todd-Hewitt broth (Oxoid) with agitation 200 rpm in a  
373 shaking incubator unless otherwise specified.

### 374 **Estimation of mutation rate phenotype by fluctuation analysis**

375 To estimate mutation rates of *S. iniae* isolates, a fluctuation analysis assay for spontaneous occurrence  
376 of rifampicin resistance was optimized according to Rosche and Foster (Rosche and Foster 2000). A  
377 single broth culture was initiated from five separate colonies, recovered on Columbia blood agar from  
378 stock cultures stored at -80°C, and grown overnight to late-exponential phase in Todd-Hewitt broth.  
379 Cultures were adjusted to  $OD_{600} = 1$  corresponding to  $\sim 10^8$  viable CFU, diluted 1:100, and distributed in  
380 200  $\mu$ l aliquots into 8 wells of a sterile U-bottom 96-well plate (Greiner) (initial number of CFU ( $N_0$ )  $\sim 10^5$   
381 per well; lower inocula produced variability in final CFU number,  $N_t$ ). A replicate plate containing at  
382 least two replicate cultures per strain was also prepared in order to monitor the culture growth by  
383 optical density with a BMG FLUOstar OPTIMA microplate reader. The 96-well plates were incubated

384 without agitation to early stationary phase. Viable CFU counts were performed for two representative  
385 cultures for each strain by Miles and Misra method (Hedges 2002), and estimated as  $1-2 \times 10^8$  CFU per  
386 culture. For selection of mutants, whole 200  $\mu$ L cultures were plated on Todd-Hewitt agar containing  
387 0.5  $\mu$ g/mL rifampicin, dried in a laminar flow hood, and incubated until rifampicin resistant colonies  
388 appeared. The assay was repeated three or more times for each strain, and results were pooled into  
389 single data sets representing 32 to 120 cultures per strain. Estimation of mutation rate ( $\mu$  - probability  
390 of mutation per cell per generation), was carried out using the Ma-Sandri-Sarkar Maximum Likelihood  
391 Estimation (MSS-MLE) method as implemented in FALCOR fluctuation analysis calculator (Hall, et al.  
392 2009) .

### 393 **DNA extraction, preparation and sequencing**

394 Genomic DNA was extracted from cells collected from 10 mL late-exponential phase culture in Todd-  
395 Hewitt broth with the DNeasy Blood & Tissue kit (Qiagen) using a modified protocol with an additional  
396 lysis step as described previously (Kawasaki, et al. 2018). gDNA was analysed on agarose gel, quantified  
397 by Qubit fluorimetry (Invitrogen), and 16S rRNA gene sequenced using universal 27F and 1492R primers  
398 (Amann, et al. 1995), to confirm integrity, identity, and purity. When the required concentration for  
399 sequencing was not achieved in samples they were dried by vacuum centrifugation (SpeedVac) at room  
400 temperature. Sequencing was performed on the Illumina HiSeq2000 platform from Nextera XT pair-end  
401 libraries at Australian Genome Research Facility, Melbourne. A reference genome from strain QMA0248  
402 was constructed using both long reads derived from a single Smrt Cell using the PacBio RS II system  
403 with P4C2 chemistry and short reads from Illumina HiSeq2000 derived from Nextera XT paired-end  
404 libraries as reported elsewhere (NCBI accession no: GCA\_002220115.1). All sequence data is deposited  
405 at NCBI under Bioproject number PRJNA417543, SRA accession SRP145425. Sample numbers, accession  
406 numbers and extended metadata are provided in Supplementary Table S1. Assembly statistics are  
407 provided in Supplementary Table S2

### 408 **Phylogenetic analysis**

409 Phylogeny was constructed based on core genome SNPs from *de novo* genome assemblies filtered to  
410 remove recombination breakpoints. Paired-end reads from Illumina were trimmed with Nsoni clip tool  
411 version 0.132 (<http://www.vicbioinformatics.com/software.nsoni.shtml>), with minimum read length  
412 50, and the first 15 bp of each read removed as quality deterioration in this region was observed when  
413 assessed with FASTQC version 0.11.5. Assembly was performed using the SPAdes assembler version  
414 3.7.1 (Bankevich, et al. 2012), with minimum read coverage cutoff set to 10. Quality of assemblies was  
415 assessed with QUAST 3.2 (Gurevich, et al. 2013). Contigs were ordered by alignment to QMA248  
416 reference genome (CP022392.1) with Mauve Contig Mover 2.4.0 (Rissman, et al. 2009). Genome

417 annotation was performed using Prokka 1.11 (Seemann 2014). Rapid alignment of core genomes was  
418 carried out using parsnip in the Harvest Tools suite version 1.2 (Treangen, et al. 2014), and the resulting  
419 alignment provided as an input to Gubbins 1.4.7 (Croucher, Page, et al. 2015) for detection and  
420 exclusion of variants produced by recombination. Phylogenies were then inferred from post-filtered  
421 core genome polymorphic sites by maximum likelihood using RAXML 7.2.8 (Stamatakis 2014) with the  
422 general time reversible nucleotide substitution model GTRGAMMA and bootstrap support from 1000  
423 iterations. Ascertainment bias associated with using only polymorphic sites was accounted for using  
424 Felsenstein's correction in RAXML. The resulting phylogenetic tree was visualized using Dendroscope v  
425 3.5.7 (Huson, et al. 2007) with bootstrap node support value cut-off 75. For the phylogram figure, tip  
426 labels were hidden for clarity and the edge containing QMA0141 was re-scaled as dotted line  
427 representing 100-fold decrease in length (Figure 1). A cladogram based on the inferred phylogeny,  
428 showing all tip labels and bootstrap support for each node, was annotated with metadata using  
429 Evolvview V2 (Figure 2) (He, et al. 2016). To determine whether there was a strong temporal signal in the  
430 phylogenetic data, a root-to-tip regression of branch length against time since isolation was performed  
431 in TempEst (Rambaut, et al. 2016), using genetic distances in an unrooted tree estimated by maximum  
432 likelihood from the alignment of non-recombinant core-genome SNPs in RAXML.

#### 433 **Variation in DNA repair genes and their regulatory regions**

434 SNP analysis of MMR and GO genes was performed by read-mapping with Geneious version 9.1  
435 (Kearse, et al. 2012), using default settings unless otherwise specified. Paired-end reads from each  
436 genome were trimmed, merged into a single file with expected distances between the reads set to 250  
437 bp, and mapped to reference genome of strain QMA0248. Mapped reads were used to detect SNPs  
438 with minimum coverage set to 10 and frequency to 0.9. A consensus pseudogenome was generated for  
439 every strain based on the reference sequence including any detected variants. Multiple alignment of  
440 pseudogenomes was carried out with *Geneious* aligning tool. Sequences of MMR genes (*dnaN*, *mutS*,  
441 *mutL*, *recD2*, *rnhC*) and OG genes (*mutY* *mutY*, *mutM*, *mutX*) annotated in the QMA0248 reference  
442 genome were identified in each strain genome sequence. Promoter regions of repair genes were  
443 determined with BPROM (V. Solovyev 2011), protein functional domains by SMART genomic (Letunic  
444 and Bork 2018), and effect of amino acid substitutions on protein function by PROVEAN Protein with a  
445 sensitivity cut-off of 1.3 (Choi and Chan 2015). To detect large variants, alignment of these regions  
446 extracted from *de novo* genome assemblies was carried out, and a 56 bp deletion detected in *mutY*  
447 promoter of clade B was confirmed by PCR using  
448 CAGAAGGAAGAAACAGAC\_F/ACCTCTATTGTAGCAAAG\_R primers.

#### 449 **Phenotypic variation related to virulence and antigenicity**

450 A multitude of intracellular and secreted enzymes contribute to virulence in the *Streptococcus* genus  
451 (Kadioglu, et al. 2008; Rajagopal 2009). Considering the large number of strains, we limited analysis to  
452 major, easily observable, and distinct phenotypes strongly associated with virulence in streptococci  
453 (capsule, hemolysis, cell chains) and bacteria in general (oxidation resistance, biofilms). All assays were  
454 performed at least in triplicate per strain.

#### 455 **Buoyant density assay for presence of polysaccharide capsule**

456 Presence/absence of polysaccharide capsule was estimated by Percoll buoyant density assay. Isotonic  
457 stock Percoll (ISP) was prepared by mixing nine parts of Percoll with one part of 1.5 M NaCl. Then, 6  
458 parts of ISP was diluted with 4 parts of 0.15 M NaCl to make final 50 % Percoll solution, which was  
459 distributed by 3 mL into flow cytometry tubes. 10 mL of THB cultures grown to late-exponential phase  
460 was adjusted at OD<sub>600</sub> 1 (10<sup>8</sup> CFU/mL), centrifuged at 3220 x g for 5min, resuspended in 0.5 mL of 0.15  
461 M NaCl, and layered onto the Percoll solution. Tubes were centrifuged at 4°C in a swinging bucket rotor  
462 at 4000 x g for 3 h with low acceleration and no brake. In this assay, encapsulated cells form a clear  
463 compact band in the Percoll gradient (Figure 3, A1), non-encapsulated cells form a pellet in the bottom  
464 of the tube (Figure 3, A2) and, occasionally, strains show differential expression of capsular  
465 polysaccharide evidenced by band and a pellet (Figure 3, A3).

#### 466 **Haemolytic activity assay on sheep blood agar**

467 Rapid high-throughput detection of impaired haemolytic activity was achieved by blood-agar clearance  
468 zone assay. Briefly, 5 mm wells were made in Columbia agar supplemented with 5% defibrinated sheep  
469 blood (Oxoid, Australia). Bacterial cultures grown to late-exponential phase (~10<sup>8</sup> CFU) were diluted  
470 1:1000 and 50 µL of diluted cultures were pipetted into punctures in the agar (initial inoculum ~5x10<sup>4</sup>  
471 CFU in each puncture). A 3 mm wide clearance zone was generally produced by bacterial lysis of sheep  
472 erythrocytes during 24 h incubation (Figure 3, B1). Where haemolysis was absent or fragmentary,  
473 impeded haemolytic activity was recorded (Figure 3, B2).

#### 474 **Chain formation microscopy**

475 To assess chain formation, *S. iniae* cultures in THB were grown stationarily in 96-well plates at 28 °C for  
476 24 h, mixed and 5 µL wet mounts prepared on a glass microscope slide. Slides were observed by bright  
477 field microscopy under 40x objective with an Olympus BX40 microscope and captured using an  
478 Olympus DP28 digital camera using CellSens software (Olympus Optical Co, Japan). Specimens were  
479 observed for at least 3 min and 2-20 cell chains were generally observed (Figure 3, C1). Where over 20  
480 cells in a chain were repeatedly detected (Figure 3, C2) increased chain formation was recorded, and  
481 when more than 10 cells in a chain were not detected by similar observation and the culture was mainly



482 composed of detached cells (Figure 3, C3) impeded chain formation was recorded. For the figure, 50  $\mu$ L  
483 of cultures were dried onto slides at RT, fixed with methanol, Gram stained, and images captured under  
484 100x objective.

#### 485 **Oxidation resistance assay**

486 Minimum inhibitory concentration (MIC) and minimum bactericidal concentration (MBC) (Andrews  
487 2001) of hydrogen peroxide were measured to assess oxidative stress resistance among *S. iniae* strains.  
488 THB cultures grown to late exponential phase were adjusted to  $OD_{600} = 1$  ( $10^8$  CFU/mL), diluted 1000-  
489 fold, and distributed by 100  $\mu$ L ( $\sim 10^4$  CFU) into wells of a U-bottom 96-well plate (Greiner). THB (100  $\mu$ L)  
490 with 2-fold excess concentration of hydrogen peroxide was added to the wells and serially diluted  
491 twofold, resulting in a range from 0 to 10 mM final peroxide concentrations. Plates were incubated  
492 stationarily for 24h and examined for presence of observable growth to determine the MIC. Viable cell  
493 counts of cultures without visible growth were performed to determine MBC. MIC of hydrogen  
494 peroxide was estimated as 3 mM for all strains, and MBC as 4 mM for the majority of strains. MBC  
495 elevated to 5 mM in dolphin and human isolates from USA was classified deviation from a wildtype  
496 phenotype.

#### 497 **Biofilm formation and visualisation assay**

498 *S. iniae* biofilms were grown for 4 days in 8-well Lab-Tek® II Chamber Slide™ Systems. To prepare an  
499 initial inoculum of  $5 \times 10^5$  CFU, THB cultures grown to late exponential phase were adjusted to  $OD_{600} = 1$   
500 ( $10^8$  CFU/mL), diluted 100-fold, and 0.5 mL of diluted cultures were placed into Chamber slide wells.  
501 After 24 h incubation, THB was removed and replaced with fresh THB every 10-14 h for 3 days. For  
502 visualisation, biofilms were washed in PBS, stained for 15 min with 1  $\mu$ M fluorescent *BacLight* Red  
503 bacterial stain, washed in PBS, fixed for 30 min with 10% formalin, and washed twice PBS. Z-stacks were  
504 collected by ZEISS LSM 710 Inverted Laser Scanning Confocal Microscope at 20x objective and visualised  
505 using ZEN2012. 8 -12  $\mu$ m thick biofilms covering up to 30% of representative 200 x 200  $\mu$ m surface  
506 produced by most strains were classified as typical (Figure 3, D1), denser (Figure 3, D2) or/and thicker  
507 (Figure 3, D3) structures were recorded as deviant.

#### 508 **Identifying wildtype virulence-related phenotypes**

509 We consider prevalent phenotypes as a wildtype, namely: presence of polysaccharide capsule (71.25 %  
510 of strains; Figure 3, A1) and haemolytic activity (85% of strains; Figure 3, B1), up to 20 cells in a chain  
511 (77.5 % of strains; Figure 3, A1), 3 mM MIC and 4 mM MBC of hydrogen peroxide (91.25 % of strains),  
512 and 8 -12  $\mu$ m thick biofilms covering up to 30% of representative image (86.25 % of strains, Fig. 4A).  
513 Other phenotypes are regarded as deviant and discussed.

## 514 **Statistical analysis**

515 Estimation of mutation rates was performed by Ma-Sandri-Sarkar-Maximum Likelihood Estimator (MSS-  
516 MLE) method. Fluctuation assay results were adjusted to equal number of mutants in the final culture  
517 and allowed comparison of mutation rates by Likelihood Ratio test (Zheng 2015) using rSalvador R  
518 package (Zheng 2017). *Compare.LD* function was applied pair-wise to all strains. Pairwise comparisons  
519 resulting in  $p$  values less than 0.05 were considered significantly different. Associations between  
520 variation in DNA repair genes, mutation rates, deviations from the wildtype virulence phenotype, and  
521 typical places of isolation were tested with a Phylogenetic Generalised Least Squares model that  
522 accounts for relatedness among strains under Pagel's  $\lambda$  of 0.6 implemented in R (Symonds and  
523 Blomberg 2014).

## 524 **Acknowledgements**

525 This work was supported by The Australian Research Council Discovery Project Grant DP120102755  
526 awarded to ACB. OS received a fee waiver from the University of Queensland School of Biological  
527 Sciences to whom we extend our thanks. For provision of strains into our collection over 15 years we  
528 thank: Judy Forbes-Faulkner, Oonoonba Veterinary Laboratory, QLD, Australia; Lynn Shewmaker, CDC,  
529 Atlanta, USA; Christian Michel, INRA, France; Suresh Benedict, Berrimah Veterinary Laboratories, NT,  
530 Australia; Nicky Buller, WA Fisheries, WA, Australia; Mark White, Tréidlia Biovet Pty (formerly Allied  
531 Biotechnology), NSW, Australia; Matt Landos, Future Fisheries Veterinary Services, NSW, Australia;  
532 Spencer Russel, Novartis Animal Health, Canada; Ruben Arturo Lopez Crespo, Regal Springs Tilapia,  
533 Honduras. ACB and OS thank Mr Nazar Rudenko for assistance with writing software pipelines and for  
534 use of his unix server. Sequence reads and de novo draft sequence assemblies derived from this work  
535 are deposited with NCBI and are accessible via BioProject PRJNA417543. Biosample numbers for raw  
536 reads and accession numbers of genome assemblies are provided in Supplementary Tables 1 and 2  
537 respectively.

## 538 References

- 539 Agnew W, Barnes AC. 2007. Streptococcus iniae: an aquatic pathogen of global veterinary  
540 significance and a challenging candidate for reliable vaccination. *Vet Microbiol* 122:1-15.
- 541 Amann RL, Ludwig W, Schleifer KH. 1995. Phylogenetic identification and in situ detection of  
542 individual microbial cells without cultivation. *Microbiology Reviews* 59:143-169.
- 543 Ambur OH, Davidsen T, Frye SA, Balasingham SV, Lagesen K, Rognes T, Tonjum T. 2009. Genome  
544 dynamics in major bacterial pathogens. *FEMS Microbiol Rev* 33:453-470.
- 545 Andisi VF, Hinojosa CA, de Jong A, Kuipers OP, Orihuela CJ, Bijlsma JJ. 2012. Pneumococcal gene  
546 complex involved in resistance to extracellular oxidative stress. *Infection and Immunity* 80:1037-  
547 1049.
- 548 Andrews JM. 2001. Determination of minimum inhibitory concentrations. *J Antimicrob Chemother*  
549 48 Suppl 1:5-16.
- 550 Aquino T, Nunes A. 2016. Host immunity and pathogen diversity: A computational study. *Virulence*  
551 7:121-128.
- 552 Bankevich A, Nurk S, Antipov D, Gurevich AA, Dvorkin M, Kulikov AS, Lesin VM, Nikolenko SI, Pham S,  
553 Pribelski AD, et al. 2012. SPAdes: a new genome assembly algorithm and its applications to single-  
554 cell sequencing. *J Comput Biol* 19:455-477.
- 555 Baumler A, Fang FC. 2013. Host specificity of bacterial pathogens. *Cold Spring Harb Perspect Med*  
556 3:a010041.
- 557 Bedford T, Cobey S, Pascual M. 2011. Strength and tempo of selection revealed in viral gene  
558 genealogies. *BMC Evol Biol* 11:220.
- 559 Bjarnsholt T. 2013. The role of bacterial biofilms in chronic infections. *APMIS Suppl*:1-51.
- 560 Blazquez J. 2003. Hypermutation as a factor contributing to the acquisition of antimicrobial  
561 resistance. *Clinical Infectious Diseases* 37:1201-1209.
- 562 Boe L, Danielsen M, Knudsen S, Petersen JB, Maymann J, Jensen PR. 2000. The frequency of  
563 mutators in populations of Escherichia coli. *Mutat Res* 448:47-55.
- 564 Canfield GS, Schwingel JM, Foley MH, Vore KL, Boonantanasantarn K, Gill AL, Sutton MD, Gill SR.  
565 2013. Evolution in fast forward: a potential role for mutators in accelerating Staphylococcus aureus  
566 pathoadaptation. *J Bacteriol* 195:615-628.
- 567 Chen F, Liu WQ, Eisenstark A, Johnston RN, Liu GR, Liu SL. 2010. Multiple genetic switches  
568 spontaneously modulating bacterial mutability. *Bmc Evolutionary Biology* 10:277.
- 569 Choi Y, Chan AP. 2015. PROVEAN web server: a tool to predict the functional effect of amino acid  
570 substitutions and indels. *Bioinformatics* 31:2745-2747.
- 571 Chopra I, O'Neill AJ, Miller K. 2003. The role of mutators in the emergence of antibiotic-resistant  
572 bacteria. *Drug Resist Updat* 6:137-145.
- 573 Cobey S. 2014. Pathogen evolution and the immunological niche. *Ann N Y Acad Sci* 1320:1-15.
- 574 Croucher NJ, Finkelstein JA, Pelton SI, Mitchell PK, Lee GM, Parkhill J, Bentley SD, Hanage WP,  
575 Lipsitch M. 2013. Population genomics of post-vaccine changes in pneumococcal epidemiology. *Nat*  
576 *Genet* 45:656-663.
- 577 Croucher NJ, Harris SR, Fraser C, Quail MA, Burton J, van der Linden M, McGee L, von Gottberg A,  
578 Song JH, Ko KS, et al. 2011. Rapid Pneumococcal Evolution in Response to Clinical Interventions.  
579 *Science* 331:430-434.
- 580 Croucher NJ, Kagedan L, Thompson CM, Parkhill J, Bentley SD, Finkelstein JA, Lipsitch M, Hanage WP.  
581 2015. Selective and genetic constraints on pneumococcal serotype switching. *PLoS Genet*  
582 11:e1005095.
- 583 Croucher NJ, Page AJ, Connor TR, Delaney AJ, Keane JA, Bentley SD, Parkhill J, Harris SR. 2015. Rapid  
584 phylogenetic analysis of large samples of recombinant bacterial whole genome sequences using  
585 Gubbins. *Nucleic Acids Res* 43:e15.

- 586 Dai L, Muraoka WT, Wu ZW, Sahin O, Zhang QJ. 2015. A single nucleotide change in mutY increases  
587 the emergence of antibiotic-resistant *Campylobacter jejuni* mutants. *Journal of Antimicrobial*  
588 *Chemotherapy* 70:2739-2748.
- 589 David SS, O'Shea VL, Kundu S. 2007. Base-excision repair of oxidative DNA damage. *Nature* 447:941-  
590 950.
- 591 de Visser JA. 2002. The fate of microbial mutators. *Microbiology* 148:1247-1252.
- 592 Deitsch KW, Moxon ER, Wellems TE. 1997. Shared themes of antigenic variation and virulence in  
593 bacterial, protozoal, and fungal infections. *Microbiol Mol Biol Rev* 61:281-293.
- 594 Dupes NM, Walsh BW, Klocko AD, Lenhart JS, Peterson HL, Gessert DA, Pavlick CE, Simmons LA.  
595 2010. Mutations in the *Bacillus subtilis* beta clamp that separate its roles in DNA replication from  
596 mismatch repair. *J Bacteriol* 192:3452-3463.
- 597 Facklam R, Elliott J, Shewmaker L, Reingold A. 2005. Identification and characterization of sporadic  
598 isolates of *Streptococcus iniae* isolated from humans. *Journal of Clinical Microbiology* 43:933-937.
- 599 Ferenci T. 2015. Trade-off Mechanisms Shaping the Diversity of Bacteria. *Trends Microbiol.*
- 600 Fukui K. 2010. DNA mismatch repair in eukaryotes and bacteria. *J Nucleic Acids* 2010.
- 601 Galhardo RS, Hastings PJ, Rosenberg SM. 2007. Mutation as a stress response and the regulation of  
602 evolvability. *Crit Rev Biochem Mol Biol* 42:399-435.
- 603 Geno KA, Gilbert GL, Song JY, Skovsted IC, Klugman KP, Jones C, Konradsen HB, Nahm MH. 2015.  
604 Pneumococcal Capsules and Their Types: Past, Present, and Future. *Clin Microbiol Rev* 28:871-899.
- 605 Giraud A, Matic I, Tenaillon O, Clara A, Radman M, Fons M, Taddei F. 2001. Costs and benefits of high  
606 mutation rates: Adaptive evolution of bacteria in the mouse gut. *Science* 291:2606-2608.
- 607 Gonzalez K, Faustoferri RC, Quivey RG, Jr. 2012. Role of DNA base excision repair in the mutability  
608 and virulence of *Streptococcus mutans*. *Molecular Microbiology* 85:361-377.
- 609 Gould CV, Sniegowski PD, Shchepetov M, Metlay JP, Weiser JN. 2007. Identifying mutator  
610 phenotypes among fluoroquinolone-resistant strains of *Streptococcus pneumoniae* using fluctuation  
611 analysis. *Antimicrob Agents Chemother* 51:3225-3229.
- 612 Gurevich A, Saveliev V, Vyahhi N, Tesler G. 2013. QAST: quality assessment tool for genome  
613 assemblies. *Bioinformatics* 29:1072-1075.
- 614 Gutierrez O, Juan C, Perez JL, Oliver A. 2004. Lack of association between hypermutation and  
615 antibiotic resistance development in *Pseudomonas aeruginosa* isolates from intensive care unit  
616 patients. *Antimicrob Agents Chemother* 48:3573-3575.
- 617 Hall BM, Ma CX, Liang P, Singh KK. 2009. Fluctuation analysis CalculatOR: a web tool for the  
618 determination of mutation rate using Luria-Delbruck fluctuation analysis. *Bioinformatics* 25:1564-  
619 1565.
- 620 Hall LM, Henderson-Begg SK. 2006. Hypermutable bacteria isolated from humans--a critical analysis.  
621 *Microbiology* 152:2505-2514.
- 622 Hammerschmidt S, Wolff S, Hocke A, Rosseau S, Muller E, Rohde M. 2005. Illustration of  
623 pneumococcal polysaccharide capsule during adherence and invasion of epithelial cells. *Infection*  
624 *and Immunity* 73:4653-4667.
- 625 He Z, Zhang H, Gao S, Lercher MJ, Chen WH, Hu S. 2016. Evolview v2: an online visualization and  
626 management tool for customized and annotated phylogenetic trees. *Nucleic Acids Res* 44:W236-241.
- 627 Healey KR, Zhao Y, Perez WB, Lockhart SR, Sobel JD, Farmakiotis D, Kontoyiannis DP, Sanglard D, Taj-  
628 Aldeen SJ, Alexander BD, et al. 2016. Prevalent mutator genotype identified in fungal pathogen  
629 *Candida glabrata* promotes multi-drug resistance. *Nat Commun* 7:11128.
- 630 Hedges AJ. 2002. Estimating the precision of serial dilutions and viable bacterial counts. *Int J Food*  
631 *Microbiol* 76:207-214.
- 632 Hegde A, Bhat GK, Mallya S. 2008. Effect of exposure to hydrogen peroxide on the virulence of  
633 *Escherichia coli*. *Indian J Med Microbiol* 26:25-28.
- 634 Huson DH, Richter DC, Rausch C, DeZulian T, Franz M, Rupp R. 2007. Dendroscope: An interactive  
635 viewer for large phylogenetic trees. *BMC Bioinformatics* 8:460.

- 636 Kadioglu A, Weiser JN, Paton JC, Andrew PW. 2008. The role of *Streptococcus pneumoniae* virulence  
637 factors in host respiratory colonization and disease. *Nat Rev Microbiol* 6:288-301.
- 638 Kawasaki M, Delamare-Deboutteville J, Bowater RO, Walker MJ, Beatson S, Ben Zakour NL, Barnes  
639 AC. 2018. Microevolution of aquatic *Streptococcus agalactiae* ST-261 from Australia indicates  
640 dissemination via imported tilapia and ongoing adaptation to marine hosts or environment. *Appl*  
641 *Environ Microbiol*.
- 642 Kears M, Moir R, Wilson A, Stones-Havas S, Cheung M, Sturrock S, Buxton S, Cooper A, Markowitz S,  
643 Duran C, et al. 2012. Geneious Basic: An integrated and extendable desktop software platform for  
644 the organization and analysis of sequence data. *Bioinformatics* 28:1647-1649.
- 645 Korkmaz G, Holm M, Wiens T, Sanyal S. 2014. Comprehensive analysis of stop codon usage in  
646 bacteria and its correlation with release factor abundance. *Journal of Biological Chemistry*  
647 289:30334-30342.
- 648 Labat F, Pradillon O, Garry L, Peuchmaur M, Fantin B, Denamur E. 2005. Mutator phenotype confers  
649 advantage in *Escherichia coli* chronic urinary tract infection pathogenesis. *FEMS Immunol Med*  
650 *Microbiol* 44:317-321.
- 651 Lenhart JS, Pillon MC, Guarne A, Biteen JS, Simmons LA. 2016. Mismatch repair in Gram-positive  
652 bacteria. *Res Microbiol* 167:4-12.
- 653 Lenhart JS, Sharma A, Hingorani MM, Simmons LA. 2013. DnaN clamp zones provide a platform for  
654 spatiotemporal coupling of mismatch detection to DNA replication. *Mol Microbiol* 87:553-568.
- 655 Letunic I, Bork P. 2018. 20 years of the SMART protein domain annotation resource. *Nucleic Acids*  
656 *Res* 46:D493-D496.
- 657 Li GM. 2008. Mechanisms and functions of DNA mismatch repair. *Cell Research* 18:85-98.
- 658 Locke JB, Colvin KM, Datta AK, Patel SK, Naidu NN, Neely MN, Nizet V, Buchanan JT. 2007.  
659 *Streptococcus iniae* capsule impairs phagocytic clearance and contributes to virulence in fish. *J*  
660 *Bacteriol* 189:1279-1287.
- 661 Locke JB, Colvin KM, Varki N, Vicknair MR, Nizet V, Buchanan JT. 2007. *Streptococcus iniae* beta-  
662 hemolysin streptolysin S is a virulence factor in fish infection. *Diseases of Aquatic Organisms* 76:17-  
663 26.
- 664 Losordo T, DeLong D, Guerdat T. 2009. Advances in technology and practice for land-based  
665 aquaculture systems: tank-based recirculating systems for finfish production. *New Technologies in*  
666 *Aquaculture*:945-983.
- 667 Lu AL, Li X, Gu Y, Wright PM, Chang DY. 2001. Repair of oxidative DNA damage: mechanisms and  
668 functions. *Cell Biochem Biophys* 35:141-170.
- 669 Lukacisinova M, Novak S, Paixao T. 2017. Stress-induced mutagenesis: Stress diversity facilitates the  
670 persistence of mutator genes. *PLoS Comput Biol* 13:e1005609.
- 671 Mackinnon MJ, Read AF. 2004. Virulence in malaria: an evolutionary viewpoint. *Philos Trans R Soc*  
672 *Lond B Biol Sci* 359:965-986.
- 673 Mao EF, Lane L, Lee J, Miller JH. 1997. Proliferation of mutators in a cell population. *J Bacteriol*  
674 179:417-422.
- 675 Matsushima A, Takakura S, Fujihara N, Saito T, Ito I, Iinuma Y, Ichiyama S. 2010. High prevalence of  
676 mutators among *Enterobacter cloacae* nosocomial isolates and their association with antimicrobial  
677 resistance and repetitive detection. *Clin Microbiol Infect* 16:1488-1493.
- 678 Maurelli AT. 2007. Black holes, antivirulence genes, and gene inactivation in the evolution of  
679 bacterial pathogens. *FEMS Microbiol Lett* 267:1-8.
- 680 Mena A, Macia MD, Borrell N, Moya B, de Francisco T, Perez JL, Oliver A. 2007. Inactivation of the  
681 mismatch repair system in *Pseudomonas aeruginosa* attenuates virulence but favors persistence of  
682 oropharyngeal colonization in cystic fibrosis mice. *J Bacteriol* 189:3665-3668.
- 683 Mena A, Smith EE, Burns JL, Speert DP, Moskowitz SM, Perez JL, Oliver A. 2008. Genetic Adaptation  
684 of *Pseudomonas aeruginosa* to the Airways of Cystic Fibrosis Patients Is Catalyzed by Hypermutation.  
685 *J Bacteriol* 190:7910-7917.

- 686 Merino D, Reglier-Poupet H, Berche P, Charbit A, European Listeria Genome C. 2002. A hypermutator  
687 phenotype attenuates the virulence of *Listeria monocytogenes* in a mouse model. *Molecular*  
688 *Microbiology* 44:877-887.
- 689 Methot PO, Alizon S. 2014. What is a pathogen? Toward a process view of host-parasite interactions.  
690 *Virulence* 5:775-785.
- 691 Millard CM, Baiano JC, Chan C, Yuen B, Aviles F, Landos M, Chong RS, Benedict S, Barnes AC. 2012.  
692 Evolution of the capsular operon of *Streptococcus iniae* in response to vaccination. *Appl Environ*  
693 *Microbiol* 78:8219-8226.
- 694 Miller JH. 1996. Spontaneous mutators in bacteria: insights into pathways of mutagenesis and repair.  
695 *Annu Rev Microbiol* 50:625-643.
- 696 Negri MC, Morosini MI, Baquero MR, del Campo R, Blazquez J, Baquero F. 2002. Very low cefotaxime  
697 concentrations select for hypermutable *Streptococcus pneumoniae* populations. *Antimicrob Agents*  
698 *Chemother* 46:528-530.
- 699 Neher RA, Hallatschek O. 2013. Genealogies of rapidly adapting populations. *Proc Natl Acad Sci U S A*  
700 110:437-442.
- 701 Nilsson AI, Kugelberg E, Berg OG, Andersson DI. 2004. Experimental adaptation of *Salmonella*  
702 *typhimurium* to mice. *Genetics* 168:1119-1130.
- 703 Oliver A. 2010. Mutators in cystic fibrosis chronic lung infection: Prevalence, mechanisms, and  
704 consequences for antimicrobial therapy. *Int J Med Microbiol* 300:563-572.
- 705 Oliver A, Mena A. 2010. Bacterial hypermutation in cystic fibrosis, not only for antibiotic resistance.  
706 *Clinical Microbiology and Infection* 16:798-808.
- 707 Picard B, Duriez P, Gouriou S, Matic I, Denamur E, Taddei H. 2001. Mutator natural *Escherichia coli*  
708 isolates have an unusual virulence phenotype. *Infection and Immunity* 69:9-14.
- 709 Pier GB, Madin SH. 1976. *Streptococcus iniae* sp nov, a beta-hemolytic *Streptococcus* isolated from  
710 an amazon freshwater dolphin, *Inia geoffrensis*. *International Journal of Systematic Bacteriology*  
711 26:545-553.
- 712 Pier GB, Madin SH, Alnakeeb S. 1978. Isolation and characterisation of a 2nd isolate of *Streptococcus*  
713 *iniae*. *International Journal of Systematic Bacteriology* 28:311-314.
- 714 Rajagopal L. 2009. Understanding the regulation of Group B Streptococcal virulence factors. *Future*  
715 *Microbiol* 4:201-221.
- 716 Rajanna C, Ouellette G, Rashid M, Zemla A, Karavis M, Zhou C, Revazishvili T, Redmond B, McNew L,  
717 Bakanidze L, et al. 2013. A strain of *Yersinia pestis* with a mutator phenotype from the Republic of  
718 Georgia. *FEMS Microbiol Lett* 343:113-120.
- 719 Rambaut A, Lam TT, Max Carvalho L, Pybus OG. 2016. Exploring the temporal structure of  
720 heterochronous sequences using TempEst (formerly Path-O-Gen). *Virus Evolution* 2.
- 721 Rissman AI, Mau B, Biehl BS, Darling AE, Glasner JD, Perna NT. 2009. Reordering contigs of draft  
722 genomes using the Mauve aligner. *Bioinformatics* 25:2071-2073.
- 723 Rodriguez JL, Dalia AB, Weiser JN. 2012. Increased chain length promotes pneumococcal adherence  
724 and colonization. *Infection and Immunity* 80:3454-3459.
- 725 Rosche WA, Foster PL. 2000. Determining mutation rates in bacterial populations. *Methods* 20:4-17.
- 726 Seemann T. 2014. Prokka: rapid prokaryotic genome annotation. *Bioinformatics* 30:2068-2069.
- 727 Shabalina SA, Spiridonov NA, Kashina A. 2013. Sounds of silence: synonymous nucleotides as a key to  
728 biological regulation and complexity. *Nucleic Acids Res* 41:2073-2094.
- 729 Shrestha S, Bjornstad ON, King AA. 2014. Evolution of acuteness in pathogen metapopulations:  
730 conflicts between "classical" and invasion-persistence trade-offs. *Theor Ecol* 7:299-311.
- 731 Smania AM, Segura I, Pezza RJ, Becerra C, Albesa I, Argarana CE. 2004. Emergence of phenotypic  
732 variants upon mismatch repair disruption in *Pseudomonas aeruginosa*. *Microbiology-Sgm* 150:1327-  
733 1338.
- 734 Sniegowski P, Raynes Y. 2013. Mutation Rates: How Low Can You Go? *Current Biology* 23:R147-R149.
- 735 Stamatakis A. 2014. RAxML version 8: a tool for phylogenetic analysis and post-analysis of large  
736 phylogenies. *Bioinformatics* 30:1312-1313.

737 Stich M, Manrubia SC, Lazaro E. 2010. Variable Mutation Rates as an Adaptive Strategy in Replicator  
738 Populations. *PLoS One* 5.  
739 Sundin GW, Weigand MR. 2007. The microbiology of mutability. *FEMS Microbiol Lett* 277:11-20.  
740 Symonds MRE, Blomberg SP. 2014. A Primer on Phylogenetic Generalised Least Squares. In:  
741 Garamszegi LZ, editor. *Modern Phylogenetic Comparative Methods and Their Application in*  
742 *Evolutionary Biology: Concepts and Practice*. Berlin, Heidelberg: Springer Berlin Heidelberg. p. 105-  
743 130.  
744 Taddei F, Radman M, MaynardSmith J, Toupance B, Gouyon PH, Godelle B. 1997. Role of mutator  
745 alleles in adaptive evolution. *Nature* 387:700-702.  
746 Tham KC, Hermans N, Winterwerp HHK, Cox MM, Wyman C, Kanaar R, Lebbink JHG. 2013. Mismatch  
747 Repair Inhibits Homeologous Recombination via Coordinated Directional Unwinding of Trapped DNA  
748 Structures. *Mol Cell* 51:326-337.  
749 Treangen TJ, Ondov BD, Koren S, Phillippy AM. 2014. The Harvest suite for rapid core-genome  
750 alignment and visualization of thousands of intraspecific microbial genomes. *Genome Biology*  
751 15:524.  
752 Turrientes MC, Baquero F, Levin BR, Martinez JL, Ripoll A, Gonzalez-Alba JM, Tobes R, Manrique M,  
753 Baquero MR, Rodriguez-Dominguez MJ, et al. 2013. Normal mutation rate variants arise in a Mutator  
754 (Mut S) *Escherichia coli* population. *PLoS One* 8:e72963.  
755 V. Solovyev AS. 2011. *Automatic Annotation of Microbial Genomes and Metagenomic Sequences*. In:  
756 *Metagenomics and its Applications in Agriculture, Biomedicine and Environmental*: Nova Science  
757 Publishers. p. 61-78.  
758 Wang S, Wang Y, Shen J, Wu Y, Wu C. 2013. Polymorphic mutation frequencies in clinical isolates of  
759 *Staphylococcus aureus*: the role of weak mutators in the development of fluoroquinolone resistance.  
760 *FEMS Microbiol Lett* 341:13-17.  
761 Weinberger DM, Malley R, Lipsitch M. 2011. Serotype replacement in disease after pneumococcal  
762 vaccination. *Lancet* 378:1962-1973.  
763 Weinstein MR, Litt M, Kertesz DA, Wyper P, Rose D, Coulter M, McGeer A, Facklam R, Ostach C,  
764 Willey BM, et al. 1997. Invasive infections due to a fish pathogen, *Streptococcus iniae*. *New England*  
765 *Journal of Medicine* 337:589-594.  
766 Wielgoss S, Barrick JE, Tenailon O, Cruveiller S, Chane-Woon-Ming B, Medigue C, Lenski RE,  
767 Schneider D. 2011. Mutation Rate Inferred From Synonymous Substitutions in a Long-Term Evolution  
768 Experiment With *Escherichia coli*. *G3 (Bethesda)* 1:183-186.  
769 Wielgoss S, Barrick JE, Tenailon O, Wiser MJ, Dittmar WJ, Cruveiller S, Chane-Woon-Ming B,  
770 Medigue C, Lenski RE, Schneider D. 2013. Mutation rate dynamics in a bacterial population reflect  
771 tension between adaptation and genetic load. *Proc Natl Acad Sci U S A* 110:222-227.  
772 Yang H, Miller JH. 2008. Deletion of *dnaN1* generates a mutator phenotype in *Bacillus anthracis*. *DNA*  
773 *Repair (Amst)* 7:507-514.  
774 Zheng Q. 2015. Methods for comparing mutation rates using fluctuation assay data. *Mutat Res*  
775 777:20-22.  
776 Zheng Q. 2017. *rSalvador: An R Package for the Fluctuation Experiment*. *G3 (Bethesda)* 7:3849-3856.  
777  
778

## 779 **Supporting Information Legends**

780 Supplementary Figure 1. Root-to-tip regression analysis (TempEst, (Rambaut, et al. 2016)of branch  
781 lengths from best-fit-rooted tree against time (year of isolation). The tree was derived from alignment  
782 of non-recombinant core-genome SNPs corrected for ascertainment bias in RAXML.

783 Supplementary Table 1. Extended metadata for 80 *Streptococcus iniae* isolates sequenced in the  
784 present study (Microsoft Excel spreadsheet)

785 Supplementary Table 2. Assembly statistics and quality data for 80 *de novo* genome assemblies  
786 prepared in this study (Microsoft Excel spreadsheet).

## 787 **Figures and tables**

788 Figure 1: Summary phylogram of *Streptococcus iniae* strains based on alignment of core genome SNPs  
789 filtered to remove recombination. Genetic distances were inferred by maximum likelihood in RAXML  
790 and node support is indicated as percentage of 1000 bootstrap replicates. Geographic origin, time  
791 range (year) of isolation, and mutation rate were added manually *post hoc*. All nodes with bootstrap  
792 support below 75% were collapsed. The phylogram is drawn with scale proportionate to genetic  
793 distance except the dashed branch supporting QMA0141, which is depicted at 10% scale. The inset  
794 shows the phylogram structure with QMA0141 branch drawn to the same scale.

795 Figure 2: Cladogram of *Streptococcus iniae* strains derived from the same dataset as Figure 1. Clade,  
796 host species, variants in MMR and GO DNA repair genes, mutation rate phenotype, and phenotypic  
797 variants associated with virulence were annotated with Evolvview. Node support is indicated as  
798 percentage of 1000 bootstrap replicates.

799 Figure 3: Phenotypic variants associated with virulence among *Streptococcus iniae* strains. A) Buoyant  
800 density assay for capsule (CPS) presence, A1: CPS+, A2 CPS- A3: CPS+/- . B) Haemolysis of sheep red  
801 blood cells by agar diffusion B1: +, B2:-. C) Streptococcal chain length C1: normal, C2: Long, C3: short. D)  
802 Biofilm formation in chamber slides determined by confocal microscopy, D1: normal, D2: Denser, D3:  
803 thicker.

804



805 Table 1. *Streptococcus iniae* strains used in this study. Includes origin details (host species, time, site  
 806 of isolation), phylogenetic affiliation, virulence-associated phenotypes, and mutation rate. Atypical  
 807 places of isolation (hosts, tissues) and deviant phenotypes are in bold.

| Strain  | Clade | Host                           | Year | Location | Capsule             | Hemolysis   | Chains       | Oxidation resistance | Biofilms               | Mutation rate (10 <sup>-7</sup> ) |
|---------|-------|--------------------------------|------|----------|---------------------|-------------|--------------|----------------------|------------------------|-----------------------------------|
| QMA0071 | A     | <i>Lates calcarifer</i>        | 2000 | QLD      | wildtype            | wildtype    | wildtype     | wildtype             | wildtype               | 0.2041                            |
| QMA0074 | C2    | <i>Lates calcarifer</i>        | 1998 | QLD      | <b>absent</b>       | wildtype    | <b>long</b>  | wildtype             | wildtype               | 0.6579                            |
| QMA0077 | C2    | <i>Lates calcarifer</i>        | 1995 | QLD      | <b>absent</b>       | wildtype    | <b>long</b>  | wildtype             | wildtype               | 0.7067                            |
| QMA0078 | A     | <i>Lates calcarifer</i>        | 2001 | QLD      | wildtype            | wildtype    | wildtype     | wildtype             | wildtype               | 0.2153                            |
| QMA0080 | C1    | <i>Lates calcarifer</i>        | 2004 | WA       | wildtype            | wildtype    | wildtype     | wildtype             | wildtype               | 0.1966                            |
| QMA0082 | C1    | <i>Lates calcarifer</i>        | 2004 | WA       | wildtype            | wildtype    | wildtype     | wildtype             | wildtype               | 0.1761                            |
| QMA0083 | A     | <i>Lates calcarifer</i>        | 2004 | WA       | wildtype            | wildtype    | wildtype     | wildtype             | wildtype               | 0.1894                            |
| QMA0084 | B     | <b><i>Pteropus alecto</i></b>  | 2001 | WA       | wildtype            | <b>weak</b> | wildtype     | wildtype             | wildtype               | 0.7293                            |
| QMA0087 | A     | <i>Lates calcarifer</i>        | 2004 | WA       | wildtype            | wildtype    | wildtype     | wildtype             | wildtype               | 0.1925                            |
| QMA0130 | E2    | <b><i>Homo sapiens</i></b>     | 1995 | Canada   | <b>absent</b>       | wildtype    | wildtype     | wildtype             | wildtype               | 0.468                             |
| QMA0131 | E2    | <b><i>Homo sapiens</i></b>     | 1995 | Canada   | <b>absent</b>       | wildtype    | wildtype     | wildtype             | wildtype               | 0.4488                            |
| QMA0133 | E1    | <b><i>Homo sapiens</i></b>     | 2001 | USA      | <b>absent</b>       | wildtype    | wildtype     | wildtype             | <b>denser</b>          | 0.5539                            |
| QMA0134 | E1    | <b><i>Homo sapiens</i></b>     | 2001 | USA      | <b>differential</b> | wildtype    | wildtype     | wildtype             | <b>denser</b>          | 0.5457                            |
| QMA0135 | E1    | <b><i>Homo sapiens</i></b>     | 2002 | USA      | wildtype            | wildtype    | <b>short</b> | <b>increased</b>     | wildtype               | 0.631                             |
| QMA0137 | E1    | <b><i>Homo sapiens</i></b>     | 2004 | USA      | wildtype            | wildtype    | <b>short</b> | <b>increased</b>     | wildtype               | 0.5495                            |
| QMA0138 | E1    | <b><i>Homo sapiens</i></b>     | 2004 | USA      | wildtype            | wildtype    | <b>short</b> | <b>increased</b>     | wildtype               | 0.5989                            |
| QMA0139 | F     | <i>Fish sp.</i>                | 1996 | Canada   | <b>absent</b>       | wildtype    | wildtype     | wildtype             | wildtype               | 0.4311                            |
| QMA0140 | G     | <b><i>Inia geoffrensis</i></b> | 1976 | USA      | <b>absent</b>       | wildtype    | wildtype     | <b>increased</b>     | <b>denser, thicker</b> | 0.0901                            |
| QMA0141 |       | <b><i>Inia geoffrensis</i></b> | 1978 | USA      | <b>absent</b>       | wildtype    | wildtype     | <b>increased</b>     | <b>denser, thicker</b> | 1.0884                            |
| QMA0142 | C1    | <i>Lates calcarifer</i>        | 2005 | NT       | wildtype            | wildtype    | wildtype     | wildtype             | wildtype               | 0.2044                            |
| QMA0150 | C1    | <i>Lates calcarifer</i>        | 2005 | NT       | wildtype            | wildtype    | wildtype     | wildtype             | wildtype               | 0.1952                            |
| QMA0155 | A     | <i>Lates calcarifer</i>        | 2005 | NSW RAS  | wildtype            | wildtype    | wildtype     | wildtype             | wildtype               | 0.1493                            |
| QMA0156 | A     | <i>Lates calcarifer</i>        | 2005 | NSW RAS  | wildtype            | wildtype    | wildtype     | wildtype             | wildtype               | 0.1666                            |
| QMA0157 | A     | <i>Lates calcarifer</i>        | 2005 | NSW RAS  | wildtype            | wildtype    | wildtype     | wildtype             | wildtype               | 0.1545                            |
| QMA0158 | A     | <i>Lates calcarifer</i>        | 2006 | SA RAS   | <b>absent</b>       | wildtype    | <b>long</b>  | wildtype             | wildtype               | 0.1678                            |
| QMA0159 | A     | <i>Lates calcarifer</i>        | 2006 | SA RAS   | wildtype            | wildtype    | wildtype     | wildtype             | wildtype               | 0.2054                            |
| QMA0160 | A     | <i>Lates calcarifer</i>        | 1999 | SA RAS   | wildtype            | wildtype    | wildtype     | wildtype             | wildtype               | 0.1481                            |
| QMA0161 | A     | <i>Lates calcarifer</i>        | 2000 | SA RAS   | wildtype            | wildtype    | wildtype     | wildtype             | wildtype               | 0.1742                            |
| QMA0162 | A     | <i>Lates calcarifer</i>        | 2000 | SA RAS   | wildtype            | wildtype    | wildtype     | wildtype             | wildtype               | 0.1718                            |
| QMA0163 | A     | <i>Lates calcarifer</i>        | 2000 | SA RAS   | wildtype            | wildtype    | wildtype     | wildtype             | wildtype               | 0.1523                            |
| QMA0164 | C2    | <i>Lates calcarifer</i>        | 2006 | QLD      | wildtype            | wildtype    | wildtype     | wildtype             | wildtype               | 0.7102                            |
| QMA0165 | C2    | <i>Lates calcarifer</i>        | 2006 | QLD      | wildtype            | wildtype    | wildtype     | wildtype             | wildtype               | 0.6606                            |
| QMA0177 | C1    | <i>Lates calcarifer</i>        | 2006 | NT       | wildtype            | wildtype    | wildtype     | wildtype             | wildtype               | 0.1718                            |
| QMA0180 | C1    | <i>Lates calcarifer</i>        | 2006 | NT       | wildtype            | wildtype    | wildtype     | wildtype             | wildtype               | 0.2011                            |
| QMA0186 | D     | <i>Oncorhynchus mykiss</i>     | 2000 | Israel   | wildtype            | <b>weak</b> | wildtype     | wildtype             | wildtype               | 0.5135                            |
| QMA0187 | G     | <i>Channa striata</i>          | 1983 | Thailand | <b>absent</b>       | <b>weak</b> | wildtype     | wildtype             | wildtype               | 0.4635                            |
| QMA0188 | D     | <i>Oncorhynchus mykiss</i>     | 1998 | Israel   | wildtype            | <b>weak</b> | wildtype     | wildtype             | wildtype               | 0.5042                            |

|         |    |                                 |      |          |                     |             |              |                  |               |        |
|---------|----|---------------------------------|------|----------|---------------------|-------------|--------------|------------------|---------------|--------|
| QMA0189 | D  | <i>Oncorhynchus mykiss</i>      | 1996 | Reu nion | wildtype            | <b>weak</b> | wildtype     | wildtype         | wildtype      | 0.4907 |
| QMA0190 | F  | <i>Channa striata</i>           | 1988 | Thailand | <b>absent</b>       | wildtype    | wildtype     | wildtype         | wildtype      | 0.6413 |
| QMA0191 | C1 | <i>Lates calcarifer</i>         | 2005 | NT       | wildtype            | wildtype    | wildtype     | wildtype         | wildtype      | 0.1883 |
| QMA0207 | C1 | <i>Lates calcarifer</i>         | 2006 | NT       | wildtype            | wildtype    | wildtype     | wildtype         | wildtype      | 0.1486 |
| QMA0216 | A  | <i>Lates calcarifer</i>         | 2007 | QLD      | <b>absent</b>       | wildtype    | <b>long</b>  | wildtype         | wildtype      | 0.1949 |
| QMA0218 | C2 | <i>Lates calcarifer</i>         | 2007 | QLD      | wildtype            | wildtype    | wildtype     | wildtype         | wildtype      | 0.7093 |
| QMA0220 | A  | <i>Lates calcarifer</i>         | 2006 | NSW RAS  | wildtype            | wildtype    | wildtype     | wildtype         | wildtype      | 0.2086 |
| QMA0221 | A  | <i>Lates calcarifer</i>         | 2007 | NSW RAS  | wildtype            | wildtype    | wildtype     | wildtype         | wildtype      | 0.1814 |
| QMA0222 | A  | <i>Lates calcarifer</i>         | 2006 | SA RAS   | wildtype            | wildtype    | wildtype     | wildtype         | wildtype      | 0.1829 |
| QMA0233 | F  | <i>Lates calcarifer, bone</i>   | 2009 | NSW RAS  | <b>absent</b>       | <b>weak</b> | <b>long</b>  | wildtype         | <b>denser</b> | 0.362  |
| QMA0234 | F  | <i>Lates calcarifer, bone</i>   | 2009 | NSW RAS  | <b>absent</b>       | <b>weak</b> | <b>long</b>  | wildtype         | <b>denser</b> | 0.354  |
| QMA0235 | F  | <i>Lates calcarifer, bone</i>   | 2009 | NSW RAS  | <b>absent</b>       | <b>weak</b> | <b>long</b>  | wildtype         | <b>denser</b> | 0.3496 |
| QMA0236 | F  | <i>Lates calcarifer, bone</i>   | 2009 | NSW RAS  | <b>absent</b>       | <b>weak</b> | <b>long</b>  | wildtype         | <b>denser</b> | 0.3413 |
| QMA0244 | A  | <i>Lates calcarifer</i>         | 2008 | SA RAS   | wildtype            | wildtype    | wildtype     | wildtype         | wildtype      | 0.2101 |
| QMA0245 | A  | <i>Lates calcarifer</i>         | 2008 | SA RAS   | wildtype            | wildtype    | wildtype     | wildtype         | wildtype      | 0.1988 |
| QMA0246 | A  | <i>Lates calcarifer</i>         | 2009 | SA RAS   | wildtype            | wildtype    | wildtype     | wildtype         | wildtype      | 0.2149 |
| QMA0247 | A  | <i>Lates calcarifer</i>         | 2009 | SA RAS   | wildtype            | wildtype    | wildtype     | wildtype         | wildtype      | 0.2059 |
| QMA0248 | A  | <i>Lates calcarifer</i>         | 2009 | SA RAS   | wildtype            | wildtype    | wildtype     | wildtype         | wildtype      | 0.1893 |
| QMA0249 | F  | <i>Lates calcarifer, bone</i>   | 2009 | SA RAS   | <b>differential</b> | <b>weak</b> | <b>long</b>  | wildtype         | <b>denser</b> | 0.3817 |
| QMA0250 | A  | <i>Lates calcarifer</i>         | 2007 | NSW RAS  | wildtype            | wildtype    | wildtype     | wildtype         | wildtype      | 0.195  |
| QMA0251 | A  | <i>Lates calcarifer</i>         | 2008 | NSW RAS  | wildtype            | wildtype    | wildtype     | wildtype         | wildtype      | 0.1927 |
| QMA0252 | A  | <i>Lates calcarifer</i>         | 2008 | NSW RAS  | wildtype            | wildtype    | wildtype     | wildtype         | wildtype      | 0.2006 |
| QMA0253 | F  | <i>Lates calcarifer, bone</i>   | 2009 | NSW RAS  | <b>absent</b>       | wildtype    | <b>long</b>  | wildtype         | <b>denser</b> | 0.3555 |
| QMA0254 | F  | <i>Lates calcarifer, bone</i>   | 2009 | NSW RAS  | <b>absent</b>       | wildtype    | <b>long</b>  | wildtype         | <b>denser</b> | 0.3712 |
| QMA0258 | A  | <i>Lates calcarifer</i>         | 2008 | QLD      | wildtype            | wildtype    | wildtype     | wildtype         | wildtype      | 0.1876 |
| QMA0371 | A  | <i>Scortum barcoo</i>           | 2011 | NSW      | wildtype            | wildtype    | wildtype     | wildtype         | wildtype      | 0.1889 |
| QMA0373 | C2 | <i>Lates calcarifer</i>         | 2012 | QLD      | wildtype            | wildtype    | wildtype     | wildtype         | wildtype      | 0.6908 |
| QMA0374 | C2 | <i>Lates calcarifer</i>         | 2012 | QLD      | wildtype            | wildtype    | wildtype     | wildtype         | wildtype      | 0.729  |
| QMA0445 | G  | <i>Oreochromis sp.</i>          | 1998 | USA      | <b>absent</b>       | wildtype    | wildtype     | wildtype         | wildtype      | 0.2149 |
| QMA0446 | G  | <i>Oreochromis sp.</i>          | 1998 | USA      | <b>absent</b>       | wildtype    | wildtype     | wildtype         | wildtype      | 0.1687 |
| QMA0447 | E1 | <i>Hybrid striped bass</i>      | 1996 | USA      | wildtype            | wildtype    | <b>short</b> | <b>increased</b> | wildtype      | 0.5902 |
| QMA0448 | E1 | <i>Hybrid striped bass</i>      | 1998 | USA      | wildtype            | wildtype    | <b>short</b> | <b>increased</b> | wildtype      | 0.5529 |
| QMA0457 | A  | <i>Oreochromis sp.</i>          | 2005 | USA      | wildtype            | wildtype    | wildtype     | wildtype         | wildtype      | 0.1682 |
| QMA0458 | A  | <i>Epalzeorhynchus bicolor</i>  | 2004 | USA      | wildtype            | wildtype    | wildtype     | wildtype         | wildtype      | 0.1778 |
| QMA0462 | B  | <i>Chromobotia macracanthus</i> | 2005 | USA      | wildtype            | <b>weak</b> | wildtype     | wildtype         | wildtype      | 0.4242 |
| QMA0463 | B  | <i>Chromobotia macracanthus</i> | 2005 | USA      | wildtype            | <b>weak</b> | wildtype     | wildtype         | wildtype      | 0.414  |
| QMA0466 | E2 | <i>Oreochromis sp.</i>          | -    | USA      | wildtype            | wildtype    | <b>short</b> | wildtype         | wildtype      | 0.4602 |
| QMA0467 | A  | <i>Epalzeorhynchus frenatum</i> | 2004 | USA      | wildtype            | wildtype    | wildtype     | wildtype         | wildtype      | 0.1695 |

|         |   |                        |      |          |          |          |          |          |          |        |
|---------|---|------------------------|------|----------|----------|----------|----------|----------|----------|--------|
| QMA0468 | A | <i>Oreochromis sp.</i> | 2005 | USA      | wildtype | wildtype | wildtype | wildtype | wildtype | 0.1689 |
| QMA0490 | A | <i>Oreochromis sp.</i> | 2015 | Honduras | wildtype | wildtype | wildtype | wildtype | wildtype | 0.1812 |
| QMA0491 | A | <i>Oreochromis sp.</i> | 2015 | Honduras | wildtype | wildtype | wildtype | wildtype | wildtype | 0.2    |
| QMA0492 | A | <i>Oreochromis sp.</i> | 2015 | Honduras | wildtype | wildtype | wildtype | wildtype | wildtype | 0.1849 |
| QMA0493 | A | <i>Oreochromis sp.</i> | 2016 | Honduras | wildtype | wildtype | wildtype | wildtype | wildtype | 0.1987 |

808

809

810

811

812

813 Table 2: Variants in MMR and GO genes found among *S. iniae* isolates. D letter next to PROVEAN  
 814 output value indicates predicted deleterious effect of amino acid change on protein function.

| Gene                       | Clade | Isolates     | Mutation         | Codon/Amino acid | Locus                                       | PROVEAN score |
|----------------------------|-------|--------------|------------------|------------------|---------------------------------------------|---------------|
| <i>mutS</i>                | G     | bone strains | G556T            | Q186K            | Pfam MutS_II                                | -0.635        |
|                            | E1,2  | all strains  | T594C            | 198              | Pfam MutS_II                                | n/a           |
| <i>mutL</i>                | G     | bone strains | C837A            | 279              | DNA mis_repair                              | n/a           |
|                            | F     | all strains  | T955G            | S319R            | DNA mis_repair                              | -2.050, D     |
|                            | B     | all strains  | C1117T           | V393I            | -                                           | -0.271        |
|                            | F     | QMA0190      | A1626T           | 542              | MutL_C                                      | n/a           |
| <i>dnaN</i>                | F     | QMA0139      | C->T             | n/a              | promoter, <i>dnaA</i> BS<br>116 bp upstream | n/a           |
|                            | G     | QMA0187      | T->C             | n/a              | promoter, <i>fnr</i> BS<br>135 bp upstream  | n/a           |
|                            | C2    | all strains  | C977T            | T326I            | Pol3Bc                                      | -2,216, D     |
|                            | C1    | all strains  | T1135C           | TAA->Q           | Stop codon                                  | n/a           |
| <i>rnhC</i>                | G     | QMA0187      | G778A            | D260N            | Pfam: RNase_HII                             | -4.593, D     |
| <i>recD2</i>               | G     | QMA0140      | A->G             | n/a              | RBS<br>15 b. p. upstream                    | n/a           |
|                            | E1    | all strains  | T->A             | n/a              | RBS<br>9 b. p. upstream                     | n/a           |
|                            | B     | all strains  | C1605T           | 535              | -                                           | n/a           |
|                            | C2    | all strains  | C1653T           | 551              | -                                           | n/a           |
| <i>mutY</i><br><i>mutY</i> | B     | all strains  | 56 b.p. deletion | n/a              | promoter<br>187 b. p. upstream              | n/a           |
|                            | F     | all strains  | T935G            | I312T            | Pfam: NUDIX_4                               | -2.544, D     |
| <i>mutM</i>                | D     | all strains  | T24G             | E8D              | Fapy_DNAglyco                               | -2.990, D     |
| <i>mutX</i>                | E2    | all strains  | A193G            | M65I             | Pfam: NUDIX                                 | -0.539        |

815

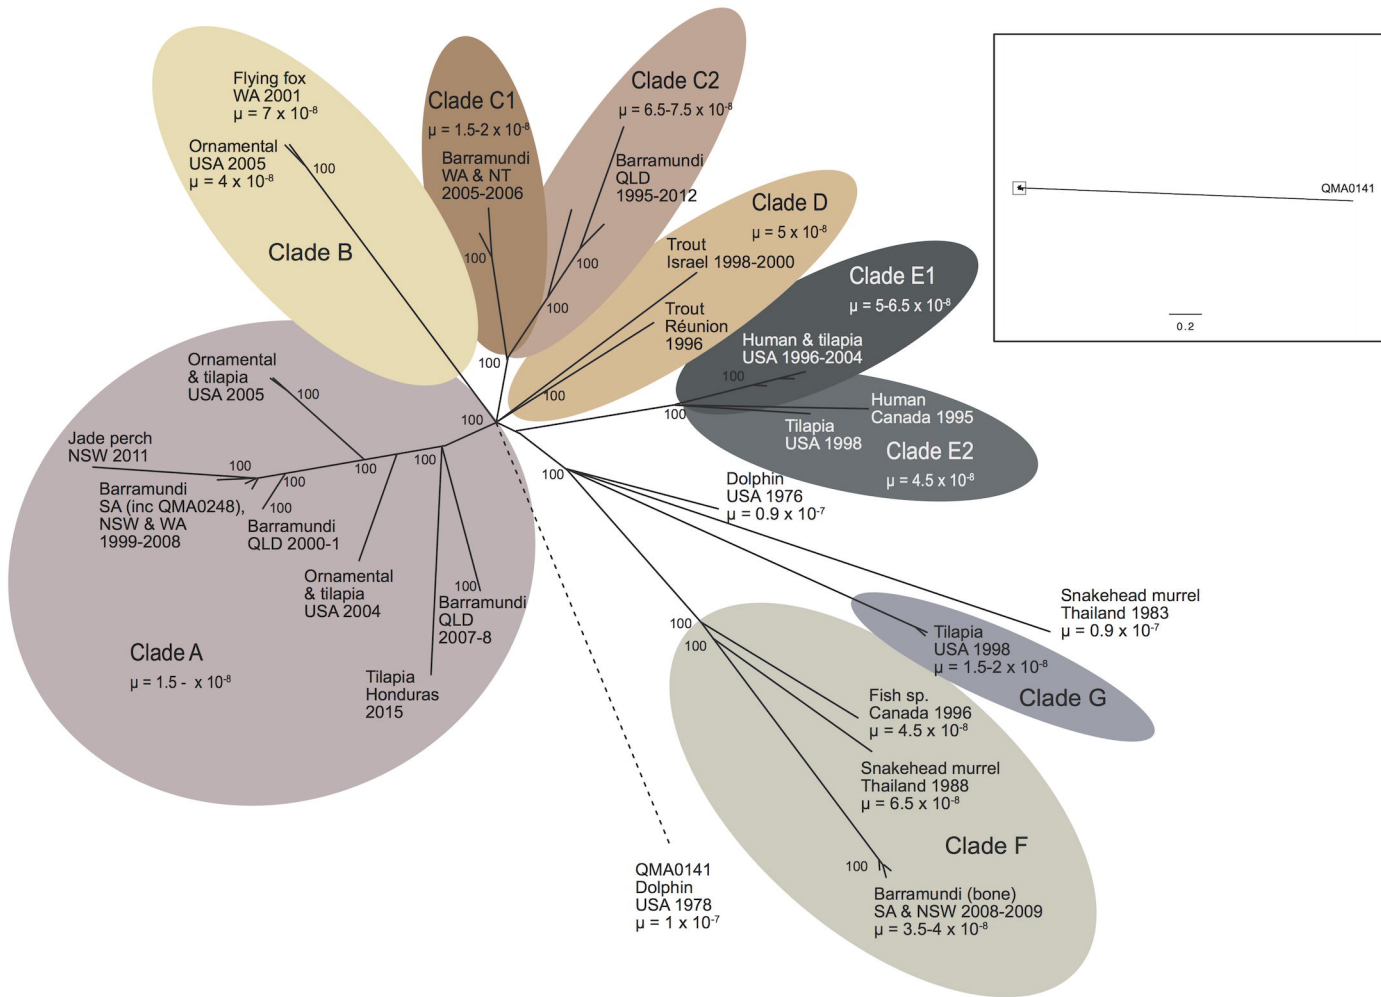

- HOST**
- MAMMALS
    - Dolphin
    - Human
    - FlyingFox
  - FOOD FISH
    - Barramundi
    - Tilapia
    - Snakehead
    - Hybrid striped bass
    - Rainbow trout
    - Jade perch
  - ORNAMENTAL
    - Clown Loach
    - Red Tail Black Shark
- CAPSULE**
- CPS+
  - CPS-
  - CPS+/-
- HAEMOLYSIS**
- Haemolytic
  - Non/weak-haemolytic
- CHAIN LENGTH**
- wildtype
  - short
  - long
- H2O2 RESISTANCE**
- wildtype
  - increased
- BIOFILM**
- wildtype
  - Denser
  - Denser & thicker
- MISMATCH/OG REPAIR**
- mutS**
- G556T
  - T594C
  - multiple
- mutL**
- T955G/C837A
  - T955G
  - C1117T
  - T955G/A1626T
  - multiple
- dnaN**
- C-116T
  - T-135C
  - C997T
  - C997T/T1135C
  - multiple
- rnhC**
- G778A
  - multiple
- recD2**
- A-15G(RBS)
  - T-9A(RBS)
  - C1605T
  - C1653T
  - multiple
- yfhQ**
- 56bp del -187(prom)
  - T935G
  - multiple
- mutM**
- T24G
  - multiple
- mutX**
- A193G
  - multiple
- Mutation rate  $\mu$  x10E-8**
- mutation rate ( $\mu$ )

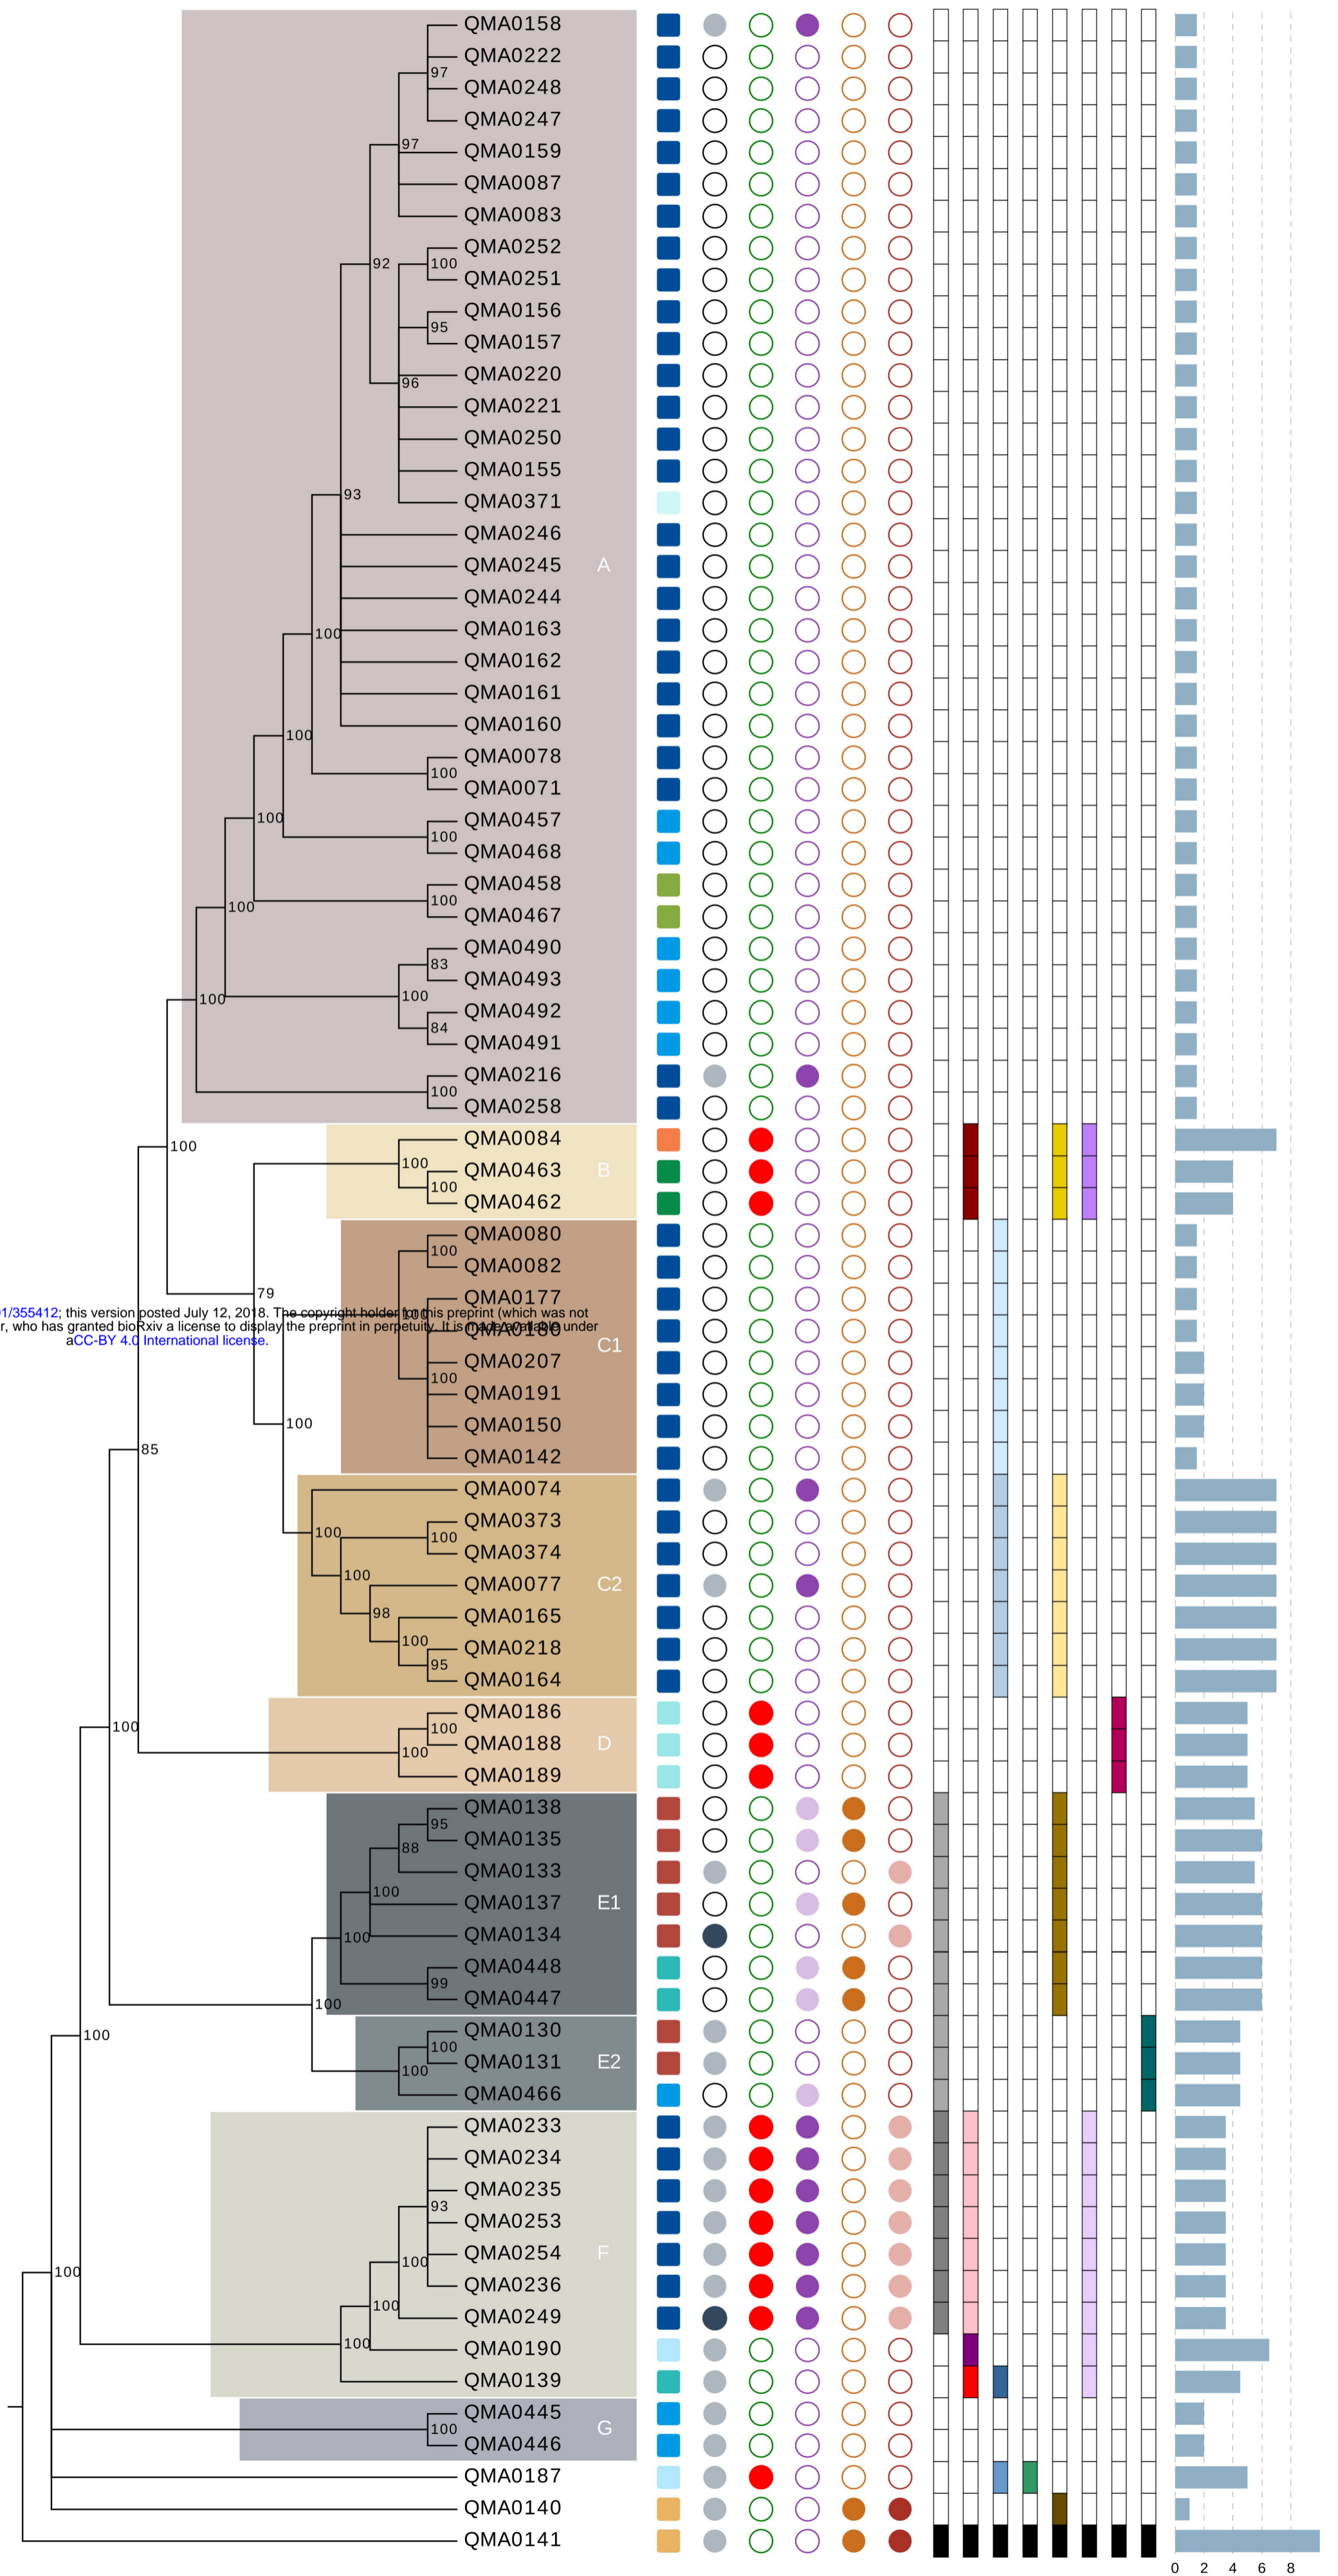

0 2 4 6 8

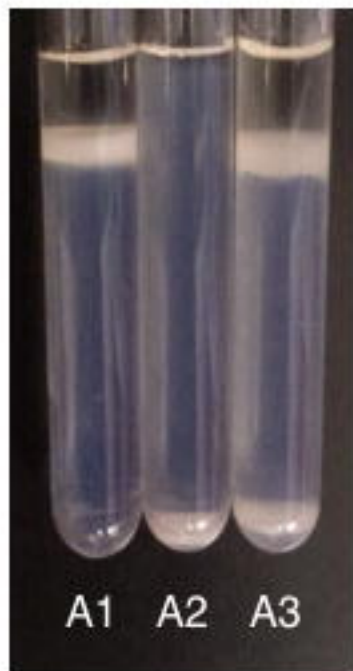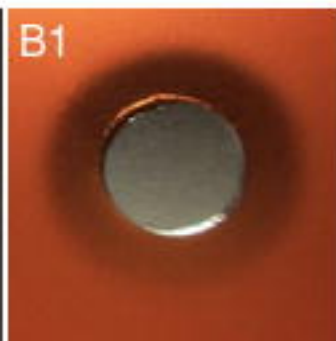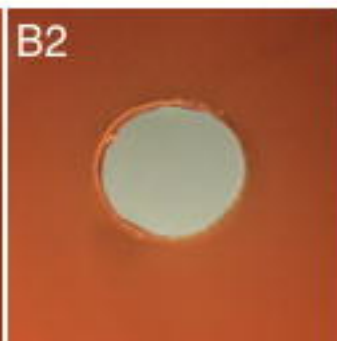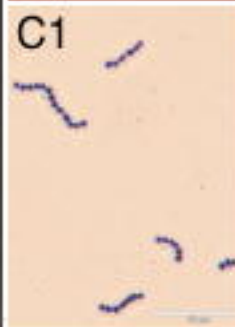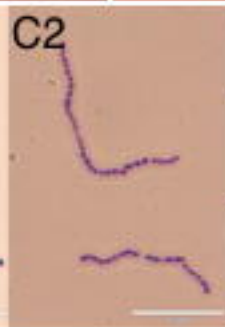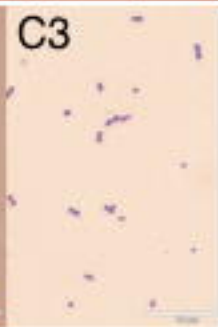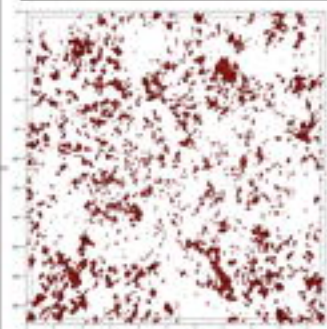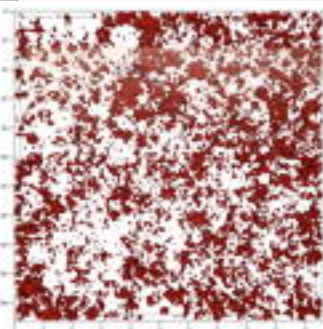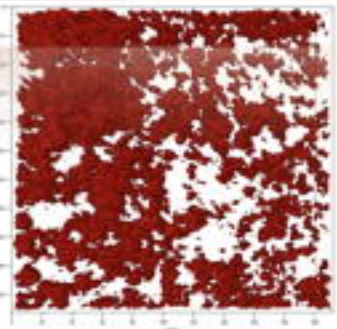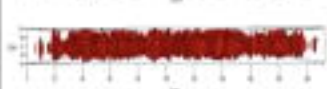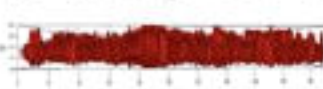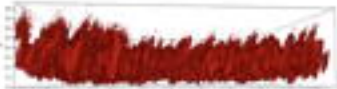

Source: https://www.biorxiv.org/content/10.1101/355412v2.full.pdf
