1 **Article**

2 **Mutators as drivers of adaptation in pathogenic bacteria and a risk factor for host jumps and vaccine**  
3 **escape**

4

5 **Oleksandra Silayeva, Jan Engelstaedter, and Andrew C Barnes\***

6 The University of Queensland, School of Biological Sciences, St Lucia Campus, Brisbane, Queensland  
7 4072, Australia

8

9

10 **Key words: mutators; DNA repair; pathogen evolution; immune escape, vaccination; Streptococcus;**  
11 **aquaculture; host jumps, zoonoses**

12

13 **\*Correspondence:**

14 **[a.barnes@uq.edu.au](mailto:a.barnes@uq.edu.au)**

15

16 **Abstract**

17 Heritable hypermutable strains deficient in DNA repair genes (mutators) facilitate microbial adaptation  
18 as they may rapidly generate beneficial mutations. Bacterial mutators deficient in mismatch (MMR) and  
19 oxidised guanine (OG) repair are abundant in clinical samples and show increased adaptive potential in  
20 experimental models of infection in mice. However, their role in pathoadaptation is poorly understood.  
21 Here we investigate the role of mutators in epidemiology and evolution of the rapidly evolving aquatic  
22 pathogen, *Streptococcus iniae*, employing a collection of 80 strains isolated globally over 40 years. We  
23 determine phylogenetic relationship among *S. iniae* using 10,267 non-recombinant core genome single  
24 nucleotide polymorphisms (SNPs), estimate their mutation rate by fluctuation analysis, and detect  
25 variation in major MMR (*mutS*, *mutL*, *dnaN*, *recD2*, *rnhC*) and OG (*mutY*, *mutM*, *mutT*) genes. We find  
26 that *S. iniae* mutation rate phenotype and genotype are strongly associated with phylogenetic  
27 diversification and variation in major streptococcal virulence determinants (capsular polysaccharide,  
28 hemolysin, cell chain length, resistance to oxidation, and biofilm formation). Furthermore, profound  
29 changes in virulence determinants observed in mammalian isolates (atypical host) and vaccine-escape  
30 isolates found in bone (atypical tissue) of vaccinated barramundi are linked to multiple MMR and OG  
31 variants and unique mutation rates. This implies that adaptation to new host taxa, new host tissue, and  
32 to immunity of a vaccinated host is promoted by mutator strains. Our findings support the importance of  
33 mutation rate dynamics in evolution of pathogenic bacteria, in particular adaptation to a drastically  
34 different immunological setting that occurs during host jump and vaccine escape events.

35

## 36 Introduction

37 Mutation rates in microbial populations are determined by a trade-off between maintenance of genetic  
38 integrity and evolvability (Stich, et al. 2010; Ferenci 2015). High fidelity of DNA repair is advantageous in  
39 adapted populations since most mutations lead to deviation from the evolved phenotype (Stich, et al.  
40 2010; Sniegowski and Raynes 2013). Conversely, lower fidelity of DNA repair can be advantageous under  
41 stressful conditions since increased mutation supply promotes diversity and may thereby accelerate  
42 adaptation (Stich, et al. 2010; Wielgoss, et al. 2013). Bacteria can efficiently fluctuate between high and  
43 low mutation regimes: While extremely low mutation rates are maintained in favourable conditions  
44 (Wielgoss, et al. 2011), elevation of mutation rates known as stress-induced mutagenesis (SIM) occurs in  
45 adapting populations (Galhardo, et al. 2007; Sundin and Weigand 2007). One aspect of SIM is temporary  
46 hypermutability associated with changes in expression of multiple genes including error-prone DNA  
47 polymerases, recombination-preventing enzymes and enzymes involved in movement of mobile  
48 elements (Foster 2007). The most extensively studied example of transient hypermutability is the RecA-  
49 mediated general stress response, SOS, associated with up-regulation of error-prone polymerases that  
50 can by-pass DNA lesions during replication (Foster 2007). However, it is recognised that increased fitness  
51 during SOS response stems from immediate growth advantage rather than from long-term evolution of  
52 resistance (Wrande, et al. 2008; Andersson and Hughes 2010; Torres-Barcelo, et al. 2015). Another aspect  
53 of SIM, and the focus of the present study, is the evolution of heritable mutator phenotypes, also referred  
54 to as constitutive, permanent, or true mutators, that contain mutator alleles and replicate over multiple  
55 generations with a high amount of error (Galhardo, et al. 2007; Sundin and Weigand 2007). Heritably  
56 hypermutable strains, which periodically arise within a population via mutations in DNA repair genes  
57 (Miller 1996; Boe, et al. 2000), are selected under stress indirectly via 'hitchhiking' of mutator alleles with  
58 stress-resistance mutations (Mao, et al. 1997; Taddei, et al. 1997), or potentially yet-to-be established  
59 pleiotropic effects conferred by inactivation of DNA repair (Torres-Barcelo, et al. 2013; Raynes and  
60 Sniegowski 2014). There is much stronger theoretical and experimental evidence demonstrating that  
61 heritable mutators facilitate adaptive evolution (Raynes and Sniegowski 2014). However, even heritable  
62 mutators are transient phenomena in natural populations as non-mutator variants are selected within  
63 already adapted mutator clones (de Visser 2002; Turrientes, et al. 2013). Restoration of mutation rate  
64 can occur via copy-number variation leading to full reversion of the mutator allele (Shaver and Sniegowski  
65 2003), disruption of the linkage between mutator alleles and beneficial mutations via recombination  
66 (Denamur, et al. 2000), anti-mutator compensatory mutations (Turrientes, et al. 2013; Wielgoss, et al.  
67 2013), or prophage excision when its integration confers increase in mutation rate (Scott, et al. 2008).

68 Mutator strains are abundant among bacterial clinical isolates, especially in chronic cases (Hall and  
69 Henderson-Begg 2006; Oliver 2010). Multiple studies have attributed this to antibiotic selection (Negri,

70 et al. 2002; Matsushima, et al. 2010; Wang, et al. 2013), since mutators are a well-established risk factor  
71 for the development of antimicrobial resistance (Blazquez 2003; Chopra, et al. 2003). However, the  
72 association between frequency of mutators in diagnostic samples and antibiotic treatments is weak  
73 (Gutierrez, et al. 2004; Mena, et al. 2008), and isogenic knockout mutator strains have increased ability  
74 to colonize an animal host in challenge models devoid of antibiotic exposure (Giraud, et al. 2001; Nilsson,  
75 et al. 2004; Healey, et al. 2016). Thus, the prevalence of mutators in clinical isolates most likely results  
76 from the selective process during adaptation to the host (Labat, et al. 2005; Mena, et al. 2007; Mena, et  
77 al. 2008; Oliver and Mena 2010), where immunity acts as the ultimate selective pressure shaping the  
78 diversity of pathogenic strains (Aquino and Nunes 2016).

79 The ‘immunological niche’ concept states that, due to the diversity and complexity of immune responses,  
80 every individual host represents a unique habitat that requires adaptation (Cobey 2014). Considering that  
81 the pathogen needs to adapt to every new host, the host population taken as a whole represents an  
82 extremely heterogeneous environment where adaptive processes are ongoing and persistence of  
83 mutator alleles may be favoured (Lukacisinova, et al. 2017). Further, as a small number of infection units  
84 may enter a host, pathogen adaptation is intrinsically associated with population bottlenecks during  
85 which the rate at which beneficial variants arise might be crucial (Metzgar and Wills 2000; Abel, et al.  
86 2015). This supports the contention that bacterial evolution is more likely to occur via multiple mutations  
87 rather than a single beneficial variant (Fogle, et al. 2008) The fitness of a pathogenic strain in the host  
88 hinges on the concept of virulence (the degree of damage to the host), which is a dynamic, complex trait  
89 determined by a multitude of virulence factors and host responses (Methot and Alizon 2014). Optimal  
90 virulence is a trade-off between acuteness and persistence with higher virulence facilitating extraction of  
91 resources and transmission, but too much damage can kill the host and stop transmission altogether  
92 (Mackinnon and Read 2004). Additionally, virulence factors are often antigens so reduced virulence may  
93 be a means of immune evasion (Deitsch, et al. 1997). Consequently, both loss and gain of virulence may  
94 be advantageous, and indicate adaptive shifts towards acute or chronic pathogenesis, respectively  
95 (Maurelli 2007; Shrestha, et al. 2014). Exacerbation and attenuation of virulence factors are repeatedly  
96 observed in both knockout and naturally occurring mutators (Picard, et al. 2001; Merino, et al. 2002;  
97 Smania, et al. 2004; Mena, et al. 2007; Gonzalez, et al. 2012; Canfield, et al. 2013). Thus, it appears that  
98 mutator strains/alleles may help pathogenic bacteria to evolve towards the optimal level of virulence.

99 Most bacterial mutators isolated from human clinical samples are deficient in genes from mismatch  
100 (MMR) and oxidised guanine (OG) DNA repair systems (Hall and Henderson-Begg 2006). MMR and OG  
101 genes are conserved across all domains of life (Fukui 2010), and single nucleotide polymorphisms in their  
102 sequence may produce drastic alterations in mutation rate (Rajanna, et al. 2013; Dai, et al. 2015).  
103 Nonetheless, these genes appear to be variable in major bacterial pathogens, confirming a potential role

104 of mutation rate dynamics in the evolution of virulence (Ambur, et al. 2009; Chen, et al. 2010). MMR is  
105 coupled to replication and removes mispaired nucleotides as well as short insertion/deletion loops, and  
106 prevents recombination between divergent sequences (Li 2008; Tham, et al. 2013). The MMR pathway  
107 has been extensively characterised in *Escherichia coli*, where the MutS dimer protein interacts with the  
108 replication processivity clamp DnaN (b-clamp), binds to the mismatch, recruits MutL, and the MutS:MutL  
109 complex then activates the MutH endonuclease (Fukui 2010). MutH cuts the unmethylated nascent  
110 strand at hemimethylated d(GATC) sites. MutL loads the UvrD helicase that unwinds the nicked DNA  
111 containing the error, which is followed by excision by one of the single-strand nucleases (Fukui 2010).  
112 This MMR organization, however, appears to be limited to *E. coli* and closely related  
113 Gammaproteobacteria (Fukui 2010; Lenhart, et al. 2016). In most bacteria and eukaryotes, MutH is  
114 absent and MutL has a conserved endonuclease site, dam methylase (acting at GATC sites) is absent and  
115 the strand discrimination signal is unknown (Fukui 2010; Lenhart, et al. 2016). Studies in *Bacillus subtilis*,  
116 a model species for gram-positive bacteria, suggest that nicks created by ribonuclease *rnhC* during  
117 removal of misincorporated ribonucleosides direct MutL endonuclease towards the newly synthesised  
118 strand, and that *recD2* acts as a MMR helicase instead of *uvrD* (Lenhart, et al. 2016). The OG system  
119 repairs oxidative DNA damage throughout the cell cycle (Lu, et al. 2001; David, et al. 2007). Among all  
120 DNA bases, guanine is most sensitive to reactive oxygen species and its oxidised form, 8-oxo-dG or OG,  
121 is highly mutagenic as it preferentially pairs with adenine which, if not corrected, leads to G:C to A:T  
122 transversion on a second round of replication (Lu, et al. 2001; David, et al. 2007). OG system organization  
123 is conserved in most bacteria and eukaryotes and generally MutT homologs remove 8-oxo-dG from the  
124 nucleotide pool, MutM homologs excise 8-oxo-dG incorporated into DNA, and MutY homologs remove  
125 adenine from OG:A mispairings (Lu, et al. 2001; David, et al. 2007).

126 The present study investigates the role of mutators and mutation rate dynamics in the epidemiology and  
127 evolution of pathogenic bacteria using the broad host-range pathogen *Streptococcus iniae*. *S. iniae* is a  
128 highly adaptable species, evidenced by its global distribution, ability to cross divergent host taxa  
129 boundaries and repeated re-infection of previously immunised hosts during disease outbreaks (Agnew  
130 and Barnes 2007; Millard, et al. 2012). Moreover, Streptococcal pathogens in general are difficult  
131 candidates for immunisation in humans and animals due to high strain diversity evidently driven by  
132 immunisation, yet there is little information on the role of mutators in this evolutionary process  
133 (Croucher, et al. 2011; Croucher, et al. 2013). We determine variation in mutation rate and identify  
134 mutations in MMR (*mutS*, *mutL*, *dnaN*, *recD2*, *rnhC*) and OG (*mutY*, *mutM*, *mutT*) genes among 80 diverse  
135 strains of *S. iniae*. We discover that both mutation rates and mutations in MMR and OG genes correlate  
136 with phylogenetic diversification but are highly conserved within phylogenetic clades. To determine  
137 whether this adaptive process might be driven by the host immune response we identify variation in

138 major phenotypic traits that determine virulence in streptococci (capsular polysaccharide, hemolysin,  
139 length of cell chains) and bacteria in general (resistance to reactive oxygen species (ROS), and biofilm  
140 formation). *S. iniae* polysaccharide capsule and the beta-hemolysin streptolysin S both increase survival  
141 under host immune response via reduction of phagocytic killing and other mechanisms (Locke, Colvin,  
142 Datta, et al. 2007; Locke, Colvin, Varki, et al. 2007; Kadioglu, et al. 2008; Rajagopal 2009). However, both  
143 are antigens that induce antibody production and development of immune memory (Kadioglu, et al.  
144 2008; Rajagopal 2009). In addition, both capsule production and hemolysin activity have many  
145 implications that are not fully understood (Kadioglu, et al. 2008; Geno, et al. 2015). For example, non-  
146 encapsulated strains exhibit greater ability to adhere to and colonize an epithelium (Hammerschmidt, et  
147 al. 2005). Length of cell-chains is also linked to virulence in streptococci: shorter chains are associated  
148 with acute infection and increased survival in the blood as they are less likely to activate the complement,  
149 whilst longer chains promote adherence and colonization (Rodriguez, et al. 2012). As pathogenic bacteria  
150 are continuously exposed to reactive oxygen released by immune cells, resistance to oxidative  
151 compounds contributes to virulence in pathogens allowing them to avoid immune clearance (Hegde, et  
152 al. 2008; Andisi, et al. 2012). Biofilm formation is also generally associated with virulence in bacteria;  
153 detached cells are associated with acute infections whereas biofilm aggregates are a hallmark of chronic  
154 conditions (Bjarnsholt 2013). The expression of these traits among *S. iniae* isolates is highly consistent  
155 with phylogenetic affiliation, which supports that strain diversity is primarily driven by adaptation to the  
156 host achieved via adjustment of virulence. Furthermore, we find that occurrence of abnormal virulence  
157 determinants is strongly associated with variation in MMR and OG genes and occurrence of infection in  
158 unusual immunological landscapes such as mammals and bone tissue of immunised fish. These data  
159 support the contention that mutators play a critical role in adaptation to the host and evolution of  
160 virulence, and suggest that these strains may facilitate the reinfection of immunised animals and  
161 transmission between divergent host species.

162

## 163 Results and Discussion

164 Our work investigates the link between mutation rate genotype and phenotype and phylogenetic  
165 diversification among *Streptococcus iniae* strains isolated globally between 1976 and 2016 from different  
166 host taxa. Maximum likelihood phylogenetic analysis of 80 *S. iniae* isolates (Table 1) based on non-  
167 recombinant core genome SNPs derived from whole genome data resolved 6 major clades (A-F), one  
168 lineage with two strains (clade G), and three lineages with a single strain (Figs. 1,2). Clades C-E are  
169 endemic; and clades A, B, and F contain strains from diverse geographic regions. Principally, variation in  
170 MMR and GO genes occurs only between the lineages, and they are highly conserved within clades (Fig.  
171 2, Table 2). In fact, sequences of the major MMR and OG genes are conserved even within phylogenetic  
172 groups not readily definable by geographic origin, time, or host species, and these genes appear to be  
173 good candidates for Multilocus Sequence Typing (MLST), i.e. identification of phylogenetic position based  
174 on selected genes as opposed to a whole genome analysis (Maiden, et al. 2013). Although even  
175 synonymous SNPs in any gene locus can affect mRNA and have pronounced phenotypic consequences  
176 (Shabalina, et al. 2013), most SNPs in MMR and OG genes were identified in protein functional domains,  
177 and most amino acid substitutions were predicted to have a deleterious effect on protein function (Table  
178 2). Further, the number of MMR and OG variants correlates significantly with mutation rate ( $p = 0.0056$ )  
179 and with the number of atypical phenotypic traits contributing to virulence ( $p = 0.0331$ ), as predicted by  
180 a Phylogenetic Generalised Least Squares (PGLS) regression model that accounts for autocorrelation  
181 occurring between closely related strains (Symonds and Blomberg 2014). In turn, mutation rate is highly  
182 consistent with phylogenetic affiliation and, according to multiple pair-wise strain comparisons by  
183 Maximum Likelihood Ratio test (Zheng 2015), with probabilities corrected for multiple comparison using  
184 False Discovery Rate (Benjamini and Hochberg 1995), mutation rate difference is insignificant within but  
185 significant between major phylogenetic lineages (Suppl. Table 1).

186 Although mutation rate variation between divergent strains is significant, the magnitude of the  
187 differences is modest (largely around 5-fold) (Figure 1, 2, Suppl. Table 2), which is consistent with mutator  
188 phenotype transience and restoration of low mutation rate in adapted populations. On the other hand,  
189 only one order of magnitude or lower differences in mutation rate distinguishes mutator from non-  
190 mutator phenotypes in streptococci (around  $10^{-7}$  and  $10^{-8}$  mutation rates respectively) (Hall and  
191 Henderson-Begg 2006; Gould, et al. 2007), in contrast to other common pathogens where 2-3 orders of  
192 magnitude differences are observed (Hall and Henderson-Begg 2006). Heritably hypermutable  
193 phenotypes are costly due to inevitable accumulation of deleterious changes. Once adaptation is gained  
194 the mutator strain is predicted to evolve back towards a lower mutation rate (de Visser 2002; Raynes and  
195 Sniegowski 2014; Sprouffske, et al. 2018). This may occur via compensatory, 'anti-mutator' mutations in  
196 DNA repair genes (Turrientes, et al. 2013; Wielgoss, et al. 2013), or via recombination (Denamur, et al.

197 2000). Our data favour the former mechanism for several reasons. Firstly, we used a maximum likelihood  
198 inference method to exclude areas of recombination from our phylogenetic analyses (Croucher, Page, et  
199 al. 2015), and the MMR and OG gene regions were not identified as recombinant regions in this analysis.  
200 Secondly, we created a pangenome for the 80 strains in our analysis and mapped on putative phage and  
201 prophage signatures (Arndt, et al. 2016), and insertion sequence elements (Siguier, et al. 2006). None of  
202 the MMR or OG genes, which are all present within the core genome of *S. iniae*, occurred in proximity to  
203 phage or ISE (Suppl. Fig. 1). Whilst we cannot rule out switch by recombination, these data suggest that  
204 accrual of SNPs via random mutation is a more likely explanation.

205 To investigate whether mutation rate phenotype and inferred phylogenetic association with MMR/OG  
206 genotype was also associated with virulence phenotype, we investigated key streptococcal virulence  
207 traits amongst the bacterial isolates in the analysis. We observe significant correlation ( $p = 0.0331$ , PGLS)  
208 of the number of MMR and OG variants with number of atypical phenotypes for traits contributing to  
209 virulence in streptococci (capsular polysaccharide, hemolysin, length of cell chains) and bacteria in  
210 general (resistance to ROS, and biofilm formation). This suggests that fluctuations in mutation rate may  
211 be linked to shifts in virulence, potentially allowing major adaptive events and leading to phylogenetic  
212 diversification (Fig. 2, Table 3). Moreover, infections in atypical hosts (mammals) and atypical tissue  
213 (bone) within apparently immune vaccinated hosts correlates strongly with number of atypical virulence-  
214 associated phenotypes ( $p = 0.000$ ) and the number of variants MMR and OG variants ( $p = 0.002$ ). This  
215 suggests that mutator strains may facilitate multiple genetic changes leading to profound shifts in  
216 virulence and antigenicity during adaptation to a drastically different immunological setting.

217 Of the clades identified within our collection of *S. iniae* isolates, Clade A is apparently a dominant  
218 circulating clade as it has persisted globally for almost two decades (Clade A contains strains isolated  
219 from USA, Honduras, and Australia between 1999 to 2016), primarily infecting closely related Perciform  
220 fish (barramundi (*Lates calcarifer*), tilapia (*Oreochromis sp*), jade perch (*Scortum barcoo*)). Mutation rates  
221 in all isolates among this ancestral lineage (35 strains analysed) fall within a  $1.5 - 2 \times 10^{-8}$  range (Figs. 1, 2;  
222 Clade A), which is similar to the base mutation rate estimated for other non-mutator gram positive  
223 bacteria (Hall and Henderson-Begg 2006; Gould, et al. 2007). All differences in mutation rates within this  
224 clade are insignificant except three pairwise comparisons that verge on  $p < 0.05$  (Suppl. Table 1). MMR  
225 and OG genes in these strains are identical, and only minor deviations from wildtype traits contributing  
226 to virulence were observed among the strains (absence of capsule production and longer cell chains in  
227 QMA0158, 216) (Figs. 1-3, Table 1). All of the other lineages (with the exceptions of clade C1 and strains  
228 QMA0445-46 discussed below) express significantly different mutation rates to clade A, contain unique  
229 and often multiple SNPs in *mut* genes, and show peculiar phenotypic variants related to virulence (Figs.  
230 1-3, Tables 1,2, Suppl. Table 1). Although phylogenetic relatedness between lineages is fully resolved (Fig.



231 2), they originate almost simultaneously and nested lineages evolve independently sharing little  
232 phylogenetic history (Figs. 1,2). Lack of correlation between branch length and sampling date derived by  
233 root-to-tip regression analysis with time is good evidence of non-neutral evolution amongst this  
234 collection of *S. iniae* isolates ( $R^2=0.0936$ , Correlation coefficient 0.306, best-fit root; Suppl. Fig. 2,  
235 (Rambaut, et al. 2016)). Deviation from a neutral model is also supported by highly skewed branching in  
236 the tree, with some branches comprising single isolates whilst others comprise many epidemiologically  
237 unrelated isolates (Figure 1, 2). This is suggestive of frequent strong selection, presumably imposed by  
238 heterogeneity of the immune landscape encountered during transfer between host individuals, and  
239 resembles genealogical tree topology derived from viral evolution over similar timespans (Bedford, et al.  
240 2011; Neher and Hallatschek 2013) although we acknowledge tree topology may also be affected by  
241 sampling bias.

242 Clade B contains QMA0084, a strain isolated from a black flying fox, *Pteropus alecto*, in Western Australia  
243 (WA) and two strains isolated from ornamental fish (clown loach or tiger botia, *Chromobotia*  
244 *macracanthus*) in USA. These isolates share a valine to isoleucine substitution in MutL predicted as  
245 neutral (PROVEAN score -0.271), a synonymous SNP in *recD2*, and a 56 bp deletion affecting the predicted  
246 promoter of *mutY* (Table 2). The latter mutation encompasses the -35 box, two binding sites of the  
247 RpoD17 general transcription factor, and the 1<sup>st</sup> bp of the -10 box, and was predicted to abolish the  
248 original promoter (Suppl. Fig. 3). However, *mutY* might still be transcribed at some level since two other  
249 potential promoters were identified in a nearby sequence (Suppl. Fig. 3). It appears that altered *mutY*  
250 expression is also affected by the rest of the genetic background as isolates exhibit significant differences  
251 (Suppl. Table 1) in mutation rate phenotype,  $7 \times 10^{-8}$  in QMA0084 and  $4 \times 10^{-8}$  in clown loach strains (Figs.  
252 1-2). Phenotypically, clade B has shifted towards decreased haemolytic activity (Fig. 3, B2).

253 Clade C shares a common ancestor with clade B and is comprised of strains obtained from barramundi  
254 farmed in WA, Northern Territory (NT) and north QLD fish farms (nested subclades C1 and C2  
255 respectively). While a core mutation rate of  $1.5-2 \times 10^{-8}$  is observed in subclade C1, a significantly higher  
256 mutation rate of  $7 \times 10^{-8}$  has been maintained in subclade C2 from north QLD for almost two decades  
257 (1995 to 2012) (Figs. 1,2 Suppl. Table 1). We speculate that the latter might be attributable to difference  
258 in meteorological conditions: periodic heavy rainfall present in tropical north QLD is likely to bring  
259 fluctuations in water salinity and temperature, creating an unstable environment where adaptive  
260 processes are ongoing and high mutation rate is advantageous. Minor variation in virulence-related  
261 phenotypes (absence of capsule production and longer cell chains in QMA0074, 77)(Fig. 2, Table 1), are  
262 supportive that mutation rate evolution in this lineage might be driven by outside-the-host factors. The  
263 significant difference in mutation rate between nested clades C1 and C2 is potentially attributable to  
264 variation in *dnaN*. In *Bacillus subtilis*, 90% of mismatch repair is dependent on targeting MutS to nascent

265 DNA via the  $\beta$  sliding clamp (DnaN) zone (Dupes, et al. 2010; Lenhart, et al. 2013). Inactivation of *dnaN1*  
266 in *B. anthracis* results in a mutator phenotype with a mutation rate equivalent to a *mutS* mismatch repair-  
267 defective strain (Yang and Miller 2008). The tyrosine to isoleucine substitution in one of the critical  
268 residues of the loader binding interface of the  $\beta$ -clamp, predicted as deleterious (PROVEAN score -2,216),  
269 is present in all isolates of from clade C (Table 2), which may explain the high mutation rate phenotype  
270 in clade C2 strains (Fig. 2, Table 2). In contrast, only subclade C1 harbours T1135C nucleotide substitution  
271 in the *dnaN* that changes stop codon TAA into CAA coding for glutamine predicted as neutral (PROVEAN  
272 score -0.005), with the next stop codon TAG found immediately downstream. Putatively, T1135C and/or  
273 change of the *dnaN* stop codon (Korkmaz, et al. 2014) may act as compensatory to the T326I substitution,  
274 reducing the mutation rate to a value not significantly different from the core rate found in clade A (Fig.  
275 1, 2) via protein elongation or by affecting translation via stop codon usage bias (Korkmaz, et al. 2014).  
276 In addition, a synonymous variant in *recD2* that is only present in subclade C2 and might affect protein  
277 expression, may contribute to the difference in mutation rate between C1 and C2 clades.

278 Clade D consists of isolates from trout (*Oncorhynchus mykiss*) from Réunion and Israel. These strains have  
279 an estimated mutation rate of  $5 \times 10^{-8}$ , contain a glutamate to aspartate substitution in *mutM* predicted  
280 to be deleterious to protein function, a synonymous SNP in *RecD2*, and exhibit impeded haemolytic  
281 activity (Fig 1,2, Table 2). Also, isolates from Israel form thicker and more dense biofilm structures (Fig.  
282 3, D2).

283 Isolates from humans and fish are found in clade E where multiple phenotypic variants contributing to  
284 virulence are observed (Figs. 2-3, Table 1). This clade contains two nested subclades that share a SNP in  
285 *mutS*, but have other unique SNPs (Fig. 2, Table 2) and exhibit mutation rates that are differently  
286 significant in most pairwise comparisons (Suppl. Table 1). Subclade E1 contains USA isolates from humans  
287 (QMA0133-35, 37-38) and hybrid striped bass (QMA0447-48), which have a substitution in the Shine-  
288 Dalgarno sequence of *recD2* and a mutation rate of  $6.5 \times 10^{-8}$  (Fig 1, Table 2). Fish strains and three human  
289 strains (QMA0135, 37-38) form shorter cell chains and higher resistance to oxidative stress. Two human  
290 strains QMA0133-34 produce thicker and more dense biofilm structures (Fig. 3, D2). QMA0133 is non-  
291 encapsulated (Fig 3, A2), and QMA0134 appears to differentially express the capsular polysaccharide in  
292 culture (Fig 3, A3). The close phylogenetic relationship presented here implicates a likely transfer from  
293 farmed hybrid bass to humans (Facklam, et al. 2005), and this host jump may have been facilitated by the  
294 mutator phenotype. Subclade E2 contains two human strains from Canada (QMA0130-31) and a tilapia  
295 strain from USA (QMA0466). These strains have unique methionine to isoleucine substitution at the N-  
296 terminus of MutX, and a mutation rate of  $4.5 \times 10^{-8}$  (Fig 1, Table 2). Both human strains are non-  
297 encapsulated (Fig. 2). The tilapia strain expresses the capsule but forms short cell chains in common with  
298 most strains from the subclade (Fig 2, Fig 3, C3). The close phylogenetic relationship again strongly

299 implicates transfer from tilapia farmed in USA to human patients in Canada via import into the Toronto  
300 fish market (Weinstein, et al. 1997) and again, this host jump may have been facilitated by the mutator  
301 state.

302 Clade F is not readily definable by location, time of isolation, or host species and comprises QMA0139  
303 from unknown fish species obtained in Canada, QMA0190 isolated from snakehead murrel in Thailand  
304 (both of which appear on long branches), and a nested terminal clade comprised of barramundi isolates  
305 farmed in Recirculating Aquaculture Systems (RAS) in New South Wales and South Australia (Fig. 2 1,2).  
306 The latter are of a particular interest as these mutators were sampled from barramundi bone lesions  
307 during a disease outbreak in vaccinated fish where infection manifested itself as a slowly progressing  
308 osteomyelitis instead of typical acute septicaemia and meningitis, implicating mutators in adaptation to  
309 new tissue in response to host immunity (Agnew and Barnes 2007; Millard, et al. 2012). Since they are  
310 distant to strains used in autogenous vaccines in clade A (QMA0155-57, 160, QMA0250-52), the atypical  
311 outbreak might be classified as a case of vaccine-induced serotype replacement (VISR) – spread of co-  
312 existing pathogenic strain/s after elimination of the dominant strain/s targeted by the vaccine  
313 (Weinberger, et al. 2011). In contrast to natural populations where the investigation of VISR is  
314 confounded by ecological and sampling biases, and randomised vaccine trials that lack power to detect  
315 the population-wide effect of mass vaccination (Weinberger, et al. 2011), barramundi RAS represent a  
316 relatively controlled and isolated natural environment where vaccination against *S. iniae* fails occasionally  
317 but recurrently (Millard, et al. 2012). RAS are self-contained facilities with minimal water exchange and  
318 high standards of water treatment (Losordo, et al. 2009). This ensures that gene flow and, consequently,  
319 the probability of new serotype introduction after vaccination is reduced to a minimum. A comparatively  
320 uniform immunized host population is exposed to dominant strains against which it was vaccinated along  
321 with potentially co-existing lineages in the RAS. In the atypical outbreaks in RAS in Australia, vaccine-  
322 induced immunity was partially effective in the infected fish, evident by absence of proliferation of the  
323 new strain in typical niduses (blood, brain, and pronephros) and cross-reactivity of vaccine-induced  
324 antibodies against bone isolates (Millard, et al. 2012). This is in contrast with the classical model of  
325 serotype replacement where a vaccine is ineffective against the replacing co-existing strain. It has been  
326 postulated that VISR can occur even if the vaccine is equally efficient against all circulating strains via  
327 other trade-off mechanisms (Weinberger, et al. 2011). Apparently, evasion of immune clearance and  
328 adaptation to osseous tissue was permitted by shift towards attenuated virulence indicated by multiple  
329 phenotypic changes in bone isolates, including absence of capsule, impeded hemolytic activity, increased  
330 cell-chain length, and denser biofilms (Fig. 3). All of these changes have previously been associated with  
331 chronic infection and increased potential for colonization (Locke, Colvin, Datta, et al. 2007; Locke, Colvin,  
332 Varki, et al. 2007; Kadioglu, et al. 2008; Andisi, et al. 2012; Rodriguez, et al. 2012; Bjarnsholt 2013; Geno,

333 et al. 2015), and only absence of polysaccharide capsule is shared with related QMA139 and QMA190, as  
334 well as QMA0140-41, QMA0187, and QMA0445-46, which implicates a non-encapsulated ancestor for  
335 these strains. The latter acapsular strain potentially also gave rise to clade E, assuming capsular  
336 production was regained in encapsulated strains found in this branch. Multiple SNPs in repair genes (Fig.  
337 2, Table 2) and the unique mutation rate (Figs. 1-2, Table 1) in bone isolates suggest that shift in virulence  
338 allowing persistence in the bone tissue might have occurred via mutator phenotype. Serine to arginine  
339 substitution in MutL and tyrosine to isoleucine substitution in MutY occur in the ancestor of QMA0139,  
340 QMA0190, and bone strains. Both substitutions are predicted to have a deleterious effect on protein  
341 function (PROVEAN scores -2.050 and -2.544 respectively), but their effect on mutation rate is combined  
342 with unique SNPs found in each branch: QMA0139 has a SNP in the binding site for the DnaA transcription  
343 factor within the *dnaN* promoter, and a mutation rate of  $4.5 \times 10^{-8}$ , QMA0190 has synonymous SNP in  
344 *mutL* and a mutation rate of  $6.5 \times 10^{-8}$ , and bone strains have glutamine to glycine substitution in MutS  
345 predicted as neutral (PROVEAN score -0.635), a synonymous SNP in *mutL*, and a mutation rate of  $3-4 \times$   
346  $10^{-8}$ . Considering that the mutation rate of QMA0190 is significantly higher compared to rates expressed  
347 by QMA0139 and bone isolates (Suppl. Table 1), it is likely that variants unique to the latter strains  
348 compensate for deleterious variants shared by the isolates (Wielgoss, et al. 2013).

349 Clade G contains two strains from tilapia isolated in USA (QMA0445-46). Notably, despite being  
350 phylogenetically distant from clade A, these strains have the same MMR and OG genotype and have  
351 retained the core mutation rate and the wildtype virulence phenotype (Fig. 2, Table 1), with the exception  
352 of capsule absence, perhaps attributable to a common non-encapsulated ancestor shared with clade F,  
353 QMA0140-41, QMA0187, and clade E.

354 Three isolates of *S. iniae* were identified as independent phylogenetic lineages, with unique mutation  
355 rate genotypes and phenotypes and combinations of phenotypes associated with virulence (Figs. 1-2,  
356 Tables 1-2). The first long branch with a single isolate contains a strain from snakehead murrel strain  
357 (*Channa striata*) from Thailand. This isolate is non-encapsulated and weakly haemolytic and has a  
358 mutation rate of  $4.5 \times 10^{-8}$ , potentially attributable to a deleterious aspartate to asparagine substitution  
359 in *rnhC* and SNP in the binding site of *fnr* transcription factor within the *dnaN* promoter. A second long  
360 branch with a single strain contains the oldest among the analysed strains, QMA0140 isolated in 1976  
361 from dolphin (*Inia geoffrensis*) (Pier and Madin 1976). This strain exhibits a mutation rate of  $1 \times 10^{-8}$ ,  
362 which is unique among the strains and significantly lower than the core mutation rate, presumably  
363 associated with increased translation rate of *recD2* helicase produced by a SNP in the ribosome binding  
364 site (Fig 2, Table 2). The longest branch on the tree contains a second dolphin strain, QMA0141, isolated  
365 two years later in 1978 (Pier, et al. 1978). This isolate is highly divergent from the rest of strains with  
366 around 20 kB of non-recombinant SNPs in pair-wise comparisons with other strains, accounting for

367 around 1% genomic difference. In contrast to QMA140, it mutates at a rate of  $1 \times 10^{-7}$ , the highest  
368 mutation rate phenotype determined among the isolates and significantly different to the rest of the  
369 values. Multiple SNPs are observed in all MMR and OG genes: 3 in *dnaN* and *mutX*, 4 in *mutM*, 9 in *mutL*  
370 and *rnhC*, 15 in *recD2*, 9 in *mutL* and *rnhC*, and 68 in *mutS*. Both dolphin isolates are non-encapsulated,  
371 show increased ability to withstand oxidative stress, and form denser and thicker biofilms (Fig 2, 3).

372 The conservation of *S. iniae* DNA repair genotypes and phenotype within phylogenetic clades and  
373 variation between the lineages is consistent with the idea of adaptive fluctuations in mutation rate being  
374 a driver of pathogen evolution, and their association with variation in virulence traits supports the  
375 contention that adaptive processes and diversification of pathogens are largely driven by host immunity.  
376 A number of genetic mechanisms have been proposed to potentially underlie the flux of mutator alleles  
377 and phenotypes, including random mutations (Wielgoss, et al. 2013), tandem repeat copy-number  
378 variation (Shaver and Sniegowski 2003; Chen, et al. 2010), non-homologous recombination (Denamur, et  
379 al. 2000), and prophage integration/excision (Scott, et al. 2008). In *S. iniae*, mutation rate dynamics  
380 appear to be primarily associated with random mutations and compensatory evolution. Tandem-repeat  
381 copy-number variants were not identified in *S. iniae* MMR or OG genes, supporting the contention that  
382 occurrence of mutator phenotypes and their full reversion via this mutational type might be limited to *E.*  
383 *coli* and closely related species (Shaver and Sniegowski 2003; Chen, et al. 2010). Indeed, the presence of  
384 tandem repeats has only been detected in *mutL* in *Proteobacteria* (Shaver and Sniegowski 2003; Chen, et  
385 al. 2010), and it is well recognized that *mutL* is structurally and functionally different in gram-positive  
386 bacteria and eukaryotes (Fukui 2010; Lenhart, et al. 2016). With the exception of the large deletion  
387 affecting the *mutY* promoter in clade B, all identified mutations are single nucleotide substitutions. These  
388 SNPs are not likely to result from gene transfer, as they were not identified amongst regions of  
389 recombination, nor within proximity to phage or ISE (Suppl. Fig. 1). These MMR and OG nucleotide  
390 substitutions most likely result from random mutations which can be sufficient to induce profound  
391 changes in mutation rate (Rajanna, et al. 2013; Dai, et al. 2015). Since, in most cases, SNPs occur in  
392 multiple genes (Fig. 2) it is likely that compensatory evolution of mutation rate prevails in *S. iniae* where  
393 some variants increase and some decrease the background mutation rate (Wielgoss, et al. 2013).

394 The association of MMR and OG variation with changes in virulence traits (Fig. 2) implies that adaptive  
395 processes in *S. iniae* population driven by host immune response may be facilitated by the emergence  
396 and decline of mutator strains. Furthermore, most profound changes in virulence-associated traits and  
397 MMR and OG variants are observed in atypical hosts (mammals) and atypical tissue (bone) within  
398 apparently immune vaccinated fish hosts (Fig. 2), which has major epidemiological implications. First,  
399 mutators may promote multiple adaptive changes required for pathogen transition among divergent host  
400 taxa known as 'host jumps', such as *Osteichthyes* and *Mammalia* discussed in the present study (Baumler

401 and Fang 2013). Second, mutators might present a risk factor to immune escape after vaccination and  
402 serotype replacement. Moreover, as evidenced by *S. iniae* colonization of bone tissue of vaccinated  
403 barramundi described previously (Millard, et al. 2012), vaccine escape leading to serotype replacement  
404 might occur without major disruption of immune recognition when multiple changes attenuating  
405 virulence and antigenicity allow persistence in a tissue with lower immune surveillance.

406 We acknowledge that our results do not exclude the possibility that variation in DNA repair genotype and  
407 phenotype may potentially represent neutral variation coinciding with shifts in virulence occurring in each  
408 phylogenetic lineage. However, complete conservation of MMR and OG genes and mutation rate within  
409 *S. iniae* lineages (Fig. 2) and the fact that most SNPs occur in functionally relevant coding and regulatory  
410 regions and/or change amino acid sequence (Table 2), supports that the occurrence of mutator strains is  
411 likely to precede and facilitate shifts in virulence leading to major diversification events and  
412 epidemiologically relevant incidents such as vaccine escape outbreaks and host jumps. Our results  
413 indicate that high mutation rate might promote transition to a new immunological setting requiring  
414 multiple mutations and phenotypic changes, such as adaptation to a novel host, new host tissue, or a host  
415 with vaccine-induced adaptive immune response. Extension to other species such as *Streptococcus*  
416 *pneumoniae* may be particularly interesting as serotype evolution following vaccination programmes is  
417 well documented, but the role of mutators in this process is not yet known (Croucher, et al. 2011;  
418 Croucher, et al. 2013; Croucher, Kagedan, et al. 2015). Future studies should determine how generalisable  
419 the role of mutators is in the epidemiology of bacterial pathogens, evolution of virulence and antigenicity,  
420 and emergence of new pathogenic strains.

## 421 **Materials and methods**

### 422 **Strains and growth conditions**

423 Eighty isolates of *S. iniae* collected in Australia, USA, Canada, Israel, Honduras, and Thailand between  
424 1976 and 2016 from eight fish species (*Lates calcarifer*, *Scortum barcoo*, *Epalzeorhynchus frenatum*,  
425 *Epalzeorhynchus bicolor*, *Oreochromis sp.*, *Channa striata*, *Chromobotia macracanthus*, *Oncorhynchus*  
426 *mykiss*) and three mammalian species (*Homo sapiens*, *Inia geoffrensis*, *Pteropus alecto*) were used in this  
427 study (Table 1). Strains were received from culture collections, veterinarians, or directly from fish farms  
428 (Suppl. Table 1) and stored as master seed stocks without further subculture at -80°C in Todd-Hewitt  
429 Broth (THB) supplemented with 20% glycerol. Bacteria were routinely recovered from -80°C stocks on  
430 Columbia agar supplemented with 5% defibrinated sheep blood (Oxoid, Australia), and cultured at 28°C  
431 on Todd-Hewitt agar or in Todd-Hewitt broth (Oxoid) with agitation 200 rpm in a shaking incubator unless  
432 otherwise specified.

### 433 **Estimation of mutation rate phenotype by fluctuation analysis**

434 To estimate mutation rates of *S. iniae* isolates, a fluctuation analysis assay for spontaneous occurrence  
435 of rifampicin resistance was optimized according to Rosche and Foster (Rosche and Foster 2000). A single  
436 broth culture was initiated from five separate colonies, recovered on Columbia blood agar from stock  
437 cultures stored at -80°C, and grown overnight to late-exponential phase in Todd-Hewitt broth (THB).  
438 Cultures were adjusted to OD<sub>600</sub> = 1 corresponding to 10<sup>8</sup> viable CFU/mL, diluted 1:100, and distributed  
439 in 200 µl aliquots into 8 wells of a sterile U-bottom 96-well plate (Greiner). Prior to dilution of 100 µl of  
440 overnight OD<sub>600</sub>-adjusted cultures were spread onto THA supplemented with 0.5 µg/mL rifampicin to  
441 confirm absence of rifampicin-resistant mutants. Although comparatively large initial inoculum (1-2 x 10<sup>5</sup>  
442 CFU per culture, confirmed by Miles and Misra CFU count (Hedges 2002) of OD-adjusted cultures) was  
443 used, this reduced to the minimum variation in final CFU number (N<sub>t</sub>) as shown by the preliminary  
444 experiments. This approach was undertaken since final population size is critical for estimation of the  
445 mutation rate and measuring N<sub>t</sub> for such a large number of strains and replicated cultures was technically  
446 prohibiting. Also, invariability in N<sub>t</sub> allowed statistical comparison of mutation rates by the Maximum  
447 Likelihood Ratio test (Zheng 2015). To infer the N<sub>t</sub> in final cultures and monitor their growth by optical  
448 density, replicate plates containing two cultures per strain were prepared and incubated in a BMG  
449 FLUOstar OPTIMA microplate reader. When these representative cultures were reaching an early  
450 stationary phase, CFU counts were performed by Miles and Misra method (Hedges 2002) and invariably  
451 estimated as 1-2 x 10<sup>8</sup> CFU in each well. Immediately after, whole 200 µL cultures were plated on Todd-  
452 Hewitt agar containing 0.5 µg/mL rifampicin for selection of mutants, dried in a laminar flow hood, and  
453 incubated until rifampicin resistant colonies appeared. The assay was repeated four times for each strain  
454 in blocks of eight cultures using 20 isolates haphazardly chosen from different phylogenetic lineages in  
455 each measurement. Processing of all 80 strains at the same time was not only time-consuming, but also  
456 compromised the uniformity of initial inoculum size due to growth of OD<sub>600</sub>-adjusted cultures after the  
457 addition of the fresh THB. In some cases, e. g. a single strain representing an independent phylogenetic  
458 lineage or with significantly differences in mutation rates detected in closely related strains, assays were  
459 repeated 1-2 more times to increase a statistical power. The rifampicin-resistant mutant counts were  
460 pooled into single data sets representing 32 to 48 cultures per strain (Suppl. Table 2).

#### 461 **DNA extraction, preparation and sequencing**

462 Genomic DNA was extracted from cells collected from 10 mL late-exponential phase culture in Todd-  
463 Hewitt broth with the DNeasy Blood & Tissue kit (Qiagen) using a modified protocol with an additional  
464 lysis step as described previously (Kawasaki, et al. 2018). gDNA was analysed on agarose gel, quantified  
465 by Qubit fluorimetry (Invitrogen), and 16S rRNA gene sequenced using universal 27F and 1492R primers  
466 (Amann, et al. 1995), to confirm integrity, identity, and purity. When the required concentration for  
467 sequencing was not achieved in samples they were dried by vacuum centrifugation (SpeedVac) at room

468 temperature. Sequencing was performed on the Illumina HiSeq2000 platform from Nextera XT pair-end  
469 libraries at Australian Genome Research Facility, Melbourne. A reference genome from strain QMA0248  
470 was constructed using both long reads derived from a single Smrt Cell using the PacBio RS II system with  
471 P4C2 chemistry and short reads from Illumina HiSeq2000 derived from Nextera XT paired-end libraries  
472 as reported elsewhere (NCBI accession no: GCA\_002220115.1). All sequence data is deposited at NCBI  
473 under Bioproject number PRJNA417543, SRA accession SRP145425. Sample numbers, accession numbers  
474 and extended metadata are provided in Suppl. Table 3. Assembly statistics are provided in Suppl. Table  
475 4.

#### 476 **Phylogenetic analysis**

477 Phylogeny was constructed based on core genome SNPs from *de novo* genome assemblies filtered to  
478 remove recombination breakpoints. Paired-end reads from Illumina were trimmed with Nesoni clip tool  
479 version 0.132 (<http://www.vicbioinformatics.com/software.nesoni.shtml>), with minimum read length  
480 50, and the first 15 bp of each read removed as quality deterioration in this region was observed when  
481 assessed with FASTQC version 0.11.5. Assembly was performed using the SPAdes assembler version 3.7.1  
482 (Bankevich, et al. 2012), with minimum read coverage cutoff set to 10. Quality of assemblies was assessed  
483 with QUAST 3.2 (Gurevich, et al. 2013). Contigs were ordered by alignment to QMA248 reference genome  
484 (CP022392.1) with Mauve Contig Mover 2.4.0 (Rissman, et al. 2009). Genome annotation was performed  
485 using Prokka 1.11 (Seemann 2014). Rapid alignment of core genomes was carried out using parsnp in the  
486 Harvest Tools suite version 1.2 (Treangen, et al. 2014), and the resulting alignment provided as an input  
487 to Gubbins 1.4.7 (Croucher, Page, et al. 2015) for detection and exclusion of variants produced by  
488 recombination. Phylogenies were then inferred from post-filtered core genome polymorphic sites by  
489 maximum likelihood using RAxML 8.2.8 (Stamatakis 2014) with the general time reversible nucleotide  
490 substitution model GTRGAMMA and bootstrap support from 1000 iterations. Effect of ascertainment bias  
491 associated with using only polymorphic sites on branch length during ML inference was corrected using  
492 Felsenstein's correction implemented in RAxML 8 (Leache, et al. 2015). The resulting phylogenetic tree  
493 was visualized using Dendroscope v 3.5.7 (Huson, et al. 2007) with bootstrap node support value cut-off  
494 75. For the phylogram figure, tip labels were hidden for clarity and the edge containing QMA0141 was  
495 re-scaled as dotted line representing 100-fold decrease in length (Fig. 1). A cladogram based on the  
496 inferred phylogeny, showing all tip labels and bootstrap support for each node, was annotated with  
497 metadata using Evolview V2 (Fig. 2) (He, et al. 2016). To determine whether there was a strong temporal  
498 signal in the phylogenetic data, a root-to-tip regression of branch length against time since isolation was  
499 performed in TempEst (Rambaut, et al. 2016), using genetic distances, corrected for ascertainment bias  
500 in an unrooted tree estimated by maximum likelihood from the alignment of non-recombinant core-  
501 genome SNPs in RAxML 8.2.8.



## 502 **Variation in DNA repair genes and their regulatory regions**

503 SNP analysis of MMR and GO genes was performed by read-mapping with Geneious version 9.1 (Kearse,  
504 et al. 2012), using default settings unless otherwise specified. Paired-end reads from each genome were  
505 trimmed, merged into a single file with expected distances between the reads set to 250 bp, and mapped  
506 to the curated reference genome of strain QMA0248. Mapped reads were used to detect SNPs with  
507 minimum coverage set to 10 and frequency to 0.9. A consensus “pseudogenome” was generated for  
508 every strain based on the reference sequence incorporating any detected variants (Ben Zakour, et al.  
509 2016). Multiple alignment of these pseudogenomes was carried out with *Geneious* aligning tool.  
510 Sequences of MMR genes (*dnaN*, *mutS*, *mutL*, *recD2*, *rhxC*) and OG genes (*mutY*, *mutM*, *mutX*) annotated  
511 in the QMA0248 reference genome were identified in each strain genome sequence. Promoter regions  
512 of repair genes were determined with BPROM (Umarov and Solovyev 2017), protein functional domains  
513 by SMART genomic (Letunic and Bork 2018), and effect of amino acid substitutions on protein function  
514 by PROVEAN Protein with a sensitivity cut-off of 1.3 (Choi and Chan 2015). To detect large variants,  
515 alignment of these regions extracted from *de novo* genome assemblies was carried out, and a 56 bp  
516 deletion detected in *mutY* promoter of clade B was confirmed by PCR with  
517 CAGAAGGAAGAAACAGAC\_F/ACCTCTATTGTAGCAAAG\_R primers.

## 518 **Detecting possible association between variation in DNA repair genes and mobilome**

519 A pangenome for the 80 *S. iniae* isolates was constructed with GView server (Petkau, et al. 2010) using  
520 the QMA0248 reference genbank (.gbk) file as seed by sequentially adding 79 genome assemblies by  
521 clade in the order derived from the cladogram (Fig. 2). Phage positions in the resulting pangenome  
522 were then determined by BLAST using Phaster (Arndt, et al. 2016) while IS positions were identified  
523 using ISFinder (Siguier, et al. 2006) with a BLAST e-value cutoff of  $1 \times 10^{-30}$ . Positions of MMR and OG  
524 genes in the pangenome were determined via manual search of the .gbk file. An image was created in  
525 BRIG (Alikhan, et al. 2011) using the pangenome as reference then aligning the 80 genome assemblies  
526 by BLAST with an e-value cutoff of  $1 \times 10^{-30}$ . The resulting image was annotated in BRIG from a  
527 spreadsheet derived from the positions determined above, and coloured according to clade (Suppl.  
528 Fig. 1).

## 529 **Phenotypic variation related to virulence and antigenicity**

530 A multitude of intracellular and secreted enzymes contribute to virulence in the *Streptococcus* genus  
531 (Kadioglu, et al. 2008; Rajagopal 2009). Considering the large number of strains, we limited analysis to  
532 major, easily observable, and distinct phenotypes strongly associated with virulence in streptococci

533 (capsule, hemolysis, cell chains) and bacteria in general (oxidation resistance, biofilms). All assays were  
534 performed at least in triplicate per strain.

#### 535 **Buoyant density assay for presence of polysaccharide capsule**

536 Presence/absence of polysaccharide capsule was estimated by Percoll buoyant density assay. Isotonic  
537 stock Percoll (ISP) was prepared by mixing nine parts of Percoll with one part of 1.5 M NaCl. Then, 6 parts  
538 of ISP was diluted with 4 parts of 0.15 M NaCl to make final 50 % Percoll solution, which was distributed  
539 by 3 mL into flow cytometry tubes. 10 mL of THB cultures grown to late-exponential phase was adjusted  
540 at OD<sub>600</sub> 1 (10<sup>8</sup> CFU/mL), centrifuged at 3220 x g for 5min, resuspended in 0.5 mL of 0.15 M NaCl, and  
541 layered onto the Percoll solution. Tubes were centrifuged at 4°C in a swinging bucket rotor at 4000 x g  
542 for 3 h with low acceleration and no brake. In this assay, encapsulated cells form a clear compact band in  
543 the Percoll gradient (Fig. 3, A1), non-encapsulated cells form a pellet in the bottom of the tube (Figure 3,  
544 A2) and, occasionally, strains show differential expression of capsular polysaccharide evidenced by band  
545 and a pellet (Fig. 3, A3).

#### 546 **Haemolytic activity assay on sheep blood agar**

547 Rapid high-throughput detection of impaired haemolytic activity was achieved by blood-agar clearance  
548 zone assay. Briefly, 5 mm wells were made in Columbia agar supplemented with 5% defibrinated sheep  
549 blood (Oxoid, Australia). Bacterial cultures grown to late-exponential phase (~10<sup>8</sup> CFU) were diluted  
550 1:1000 and 50 µL of diluted cultures were pipetted into punctures in the agar (initial inoculum ~5x10<sup>4</sup>  
551 CFU in each puncture). A 3 mm wide clearance zone was generally produced by bacterial lysis of sheep  
552 erythrocytes during 24 h incubation (Fig. 3, B1). Where haemolysis was absent or fragmentary, impeded  
553 haemolytic activity was recorded (Fig. 3, B2).

#### 554 **Chain formation microscopy**

555 To assess chain formation, *S. iniae* cultures in THB were grown stationarily in 96-well plates at 28 °C for  
556 24 h, mixed and 5 µL wet mounts prepared on a glass microscope slide. Slides were observed by bright  
557 field microscopy under 40x objective with an Olympus BX40 microscope and captured using an Olympus  
558 DP28 digital camera using CellSens software (Olympus Optical Co, Japan). Specimens were observed for  
559 at least 3 min and 2-20 cell chains were generally observed (Fig. 3, C1). Where over 20 cells in a chain  
560 were repeatedly detected (Fig. 3, C2) increased chain formation was recorded, and when more than 10  
561 cells in a chain were not detected by similar observation and the culture was mainly composed of  
562 detached cells (Fig. 3, C3) impeded chain formation was recorded. For the figure, 50 µL of cultures were  
563 dried onto slides at RT, fixed with methanol, Gram stained, and images captured under 100x objective.

#### 564 **Oxidation resistance assay**

565 Minimum inhibitory concentration (MIC) and minimum bactericidal concentration (MBC) (Andrews 2001)  
566 of hydrogen peroxide were measured to assess oxidative stress resistance among *S. iniae* strains. THB  
567 cultures grown to late exponential phase were adjusted to  $OD_{600} = 1$  ( $10^8$  CFU/mL), diluted 1000-fold, and  
568 distributed by 100  $\mu$ L ( $\sim 10^4$  CFU) into wells of a U-bottom 96-well plate (Greiner). THB (100  $\mu$ L) with 2-  
569 fold excess concentration of hydrogen peroxide was added to the wells and serially diluted twofold,  
570 resulting in a range from 0 to 10 mM final peroxide concentrations. Plates were incubated stationarily  
571 for 24h and examined for presence of observable growth to determine the MIC. Viable cell counts of  
572 cultures without visible growth were performed to determine MBC. MIC of hydrogen peroxide was  
573 estimated as 3 mM for all strains, and MBC as 4 mM for the majority of strains. MBC elevated to 5 mM  
574 in dolphin and human isolates from USA was classified deviation from a wildtype phenotype.

### 575 **Biofilm formation and visualisation assay**

576 *S. iniae* biofilms were grown for 4 days in 8-well Lab-Tek® II Chamber Slide™ Systems. To prepare an initial  
577 inoculum of  $5 \times 10^5$  CFU, THB cultures grown to late exponential phase were adjusted to  $OD_{600} = 1$  ( $10^8$   
578 CFU/mL), diluted 100-fold, and 0.5 mL of diluted cultures were placed into Chamber slide wells. After 24  
579 h incubation, THB was removed and replaced with fresh THB every 10-14 h for 3 days. For visualisation,  
580 biofilms were washed in PBS, stained for 15 min with 1  $\mu$ M fluorescent BacLight Red bacterial stain,  
581 washed in PBS, fixed for 30 min with 10% formalin, and washed twice PBS. Z-stacks were collected by  
582 ZEISS LSM 710 Inverted Laser Scanning Confocal Microscope at 20x objective and visualised using  
583 ZEN2012. Quantification of biofilms was performed using COMSTAT (Verotta, et al. 2017). Structures of  
584 biomass larger than 3.5 and average thickness over 5 were classified as increased biofilm forming activity  
585 (Fig. 3 D).

586 .

### 587 **Identifying wildtype virulence-related phenotypes**

588 We consider prevalent phenotypes as a wildtype, namely: presence of polysaccharide capsule (71.25 %  
589 of strains; Figure 3, A1) and haemolytic activity (85% of strains; Figure 3, B1), up to 20 cells in a chain  
590 (77.5 % of strains; Figure 3, A1), 3 mM MIC and 4 mM MBC of hydrogen peroxide (91.25 % of strains),  
591 and 8 -12  $\mu$ m thick biofilms covering up to 30% of representative image (86.25 % of strains, Fig. 4A). Other  
592 phenotypes are regarded as deviant and discussed.

### 593 **Statistical analysis**

594 Analysis of co-variance between number of MMR and OG variants, mutation rates, number of atypical  
595 phenotype associated with virulence, and atypical places of isolation were tested with a Phylogenetic  
596 Generalised Least Squares model that accounts for relatedness among strains under Pagel's  $\lambda$  of 0.6

597 implemented in R (Symonds and Blomberg 2014). Estimation of mutation rates was carried out using  
598 the Ma-Sandri-Sarkar Maximum Likelihood Estimation (MSS-MLE) method as implemented in FALCOR  
599 fluctuation analysis calculator (Hall, et al. 2009). Differences in mutation rates were compared by  
600 Likelihood Ratio Test (LRT) using the rSalvador R package (Zheng 2015, 2017). LRT estimates the  
601 overlap between confidence intervals calculated for two fluctuation experiment data sets and allows  
602 to compare fluctuation assay data with different number of cultures and resolve very small differences  
603 in mutation rate (Zheng 2015, 2017). The *Compare.LD* function was applied pair-wise to all strains,  
604 and obtained  $p$  values were corrected for multiple comparisons by controlling the False Discovery Rate  
605 (Benjamini and Hochberg 1995) using `p.adjust` in R. Adjusted  $p$  values less than 0.05 were considered  
606 to indicate significant difference in mutation rates.

607

## 608 **Acknowledgements**

609 This work was supported by The Australian Research Council Discovery Project Grant DP120102755  
610 awarded to ACB. We thank the University of Queensland School of Biological Sciences for funding a  
611 tuition fee waiver for OS. For provision of strains into our collection over 15 years we thank: Judy Forbes-  
612 Faulkner, Oonoonba Veterinary Laboratory, QLD, Australia; Lynn Shewmaker, CDC, Atlanta, USA;  
613 Christian Michel, INRA, France; Suresh Benedict, Berrimah Veterinary Laboratories, NT, Australia; Nicky  
614 Buller, WA Fisheries, WA, Australia; Mark White, Tréidlia Biovet Pty (formerly Allied Biotechnology), NSW,  
615 Australia; Matt Landos, Future Fisheries Veterinary Services, NSW, Australia; Spencer Russell, Novartis  
616 Animal Health, Canada; Ruben Arturo Lopez Crespo, Regal Springs Tilapia, Honduras. We thank Dr Simone  
617 Blomberg for advice on statistical analyses and Mr Nazar Rudenko for assistance with writing software  
618 pipelines and for use of his Unix server.

## 619 References

- 620 Abel S, Abel zur Wiesch P, Davis BM, Waldor MK. 2015. Analysis of Bottlenecks in Experimental  
621 Models of Infection. *PLoS Pathog* 11:e1004823.
- 622 Agnew W, Barnes AC. 2007. *Streptococcus iniae*: an aquatic pathogen of global veterinary  
623 significance and a challenging candidate for reliable vaccination. *Vet Microbiol* 122:1-15.
- 624 Alikhan NF, Petty NK, Ben Zakour NL, Beatson SA. 2011. BLAST Ring Image Generator (BRIG): simple  
625 prokaryote genome comparisons. *BMC Genomics* 12:402.
- 626 Amann RI, Ludwig W, Schleifer KH. 1995. Phylogenetic identification and in situ detection of  
627 individual microbial cells without cultivation. *Microbiology Reviews* 59:143-169.
- 628 Ambur OH, Davidsen T, Frye SA, Balasingham SV, Lagesen K, Rognes T, Tonjum T. 2009. Genome  
629 dynamics in major bacterial pathogens. *FEMS Microbiol Rev* 33:453-470.
- 630 Andersson DI, Hughes D. 2010. Antibiotic resistance and its cost: is it possible to reverse resistance?  
631 *Nat Rev Microbiol* 8:260-271.
- 632 Andisi VF, Hinojosa CA, de Jong A, Kuipers OP, Orihuela CJ, Bijlsma JJ. 2012. Pneumococcal gene  
633 complex involved in resistance to extracellular oxidative stress. *Infection and Immunity* 80:1037-  
634 1049.
- 635 Andrews JM. 2001. Determination of minimum inhibitory concentrations. *J Antimicrob Chemother*  
636 48 Suppl 1:5-16.
- 637 Aquino T, Nunes A. 2016. Host immunity and pathogen diversity: A computational study. *Virulence*  
638 7:121-128.
- 639 Arndt D, Grant JR, Marcu A, Sajed T, Pon A, Liang YJ, Wishart DS. 2016. PHASTER: a better, faster  
640 version of the PHAST phage search tool. *Nucleic Acids Research* 44:W16-W21.
- 641 Bankevich A, Nurk S, Antipov D, Gurevich AA, Dvorkin M, Kulikov AS, Lesin VM, Nikolenko SI, Pham S,  
642 Prjibelski AD, et al. 2012. SPAdes: a new genome assembly algorithm and its applications to single-  
643 cell sequencing. *J Comput Biol* 19:455-477.
- 644 Baumler A, Fang FC. 2013. Host specificity of bacterial pathogens. *Cold Spring Harb Perspect Med*  
645 3:a010041.
- 646 Bedford T, Cobey S, Pascual M. 2011. Strength and tempo of selection revealed in viral gene  
647 genealogies. *BMC Evol Biol* 11:220.
- 648 Ben Zakour NL, Alsheikh-Hussain AS, Ashcroft MM, Khanh Nhu NT, Roberts LW, Stanton-Cook M,  
649 Schembri MA, Beatson SA. 2016. Sequential Acquisition of Virulence and Fluoroquinolone Resistance  
650 Has Shaped the Evolution of *Escherichia coli* ST131. *MBio* 7:e00347-00316.
- 651 Benjamini Y, Hochberg Y. 1995. Controlling the False Discovery Rate - a Practical and Powerful  
652 Approach to Multiple Testing. *Journal of the Royal Statistical Society Series B-Methodological*  
653 57:289-300.
- 654 Bjarnsholt T. 2013. The role of bacterial biofilms in chronic infections. *APMIS Suppl*:1-51.
- 655 Blazquez J. 2003. Hypermutation as a factor contributing to the acquisition of antimicrobial  
656 resistance. *Clinical Infectious Diseases* 37:1201-1209.
- 657 Boe L, Danielsen M, Knudsen S, Petersen JB, Maymann J, Jensen PR. 2000. The frequency of  
658 mutators in populations of *Escherichia coli*. *Mutat Res* 448:47-55.
- 659 Canfield GS, Schwingel JM, Foley MH, Vore KL, Boonantanasarn K, Gill AL, Sutton MD, Gill SR.  
660 2013. Evolution in fast forward: a potential role for mutators in accelerating *Staphylococcus aureus*  
661 pathoadaptation. *J Bacteriol* 195:615-628.
- 662 Chen F, Liu WQ, Eisenstark A, Johnston RN, Liu GR, Liu SL. 2010. Multiple genetic switches  
663 spontaneously modulating bacterial mutability. *Bmc Evolutionary Biology* 10:277.
- 664 Choi Y, Chan AP. 2015. PROVEAN web server: a tool to predict the functional effect of amino acid  
665 substitutions and indels. *Bioinformatics* 31:2745-2747.
- 666 Chopra I, O'Neill AJ, Miller K. 2003. The role of mutators in the emergence of antibiotic-resistant  
667 bacteria. *Drug Resist Updat* 6:137-145.
- 668 Cobey S. 2014. Pathogen evolution and the immunological niche. *Ann N Y Acad Sci* 1320:1-15.

- 669 Croucher NJ, Finkelstein JA, Pelton SI, Mitchell PK, Lee GM, Parkhill J, Bentley SD, Hanage WP,  
670 Lipsitch M. 2013. Population genomics of post-vaccine changes in pneumococcal epidemiology. *Nat*  
671 *Genet* 45:656-663.
- 672 Croucher NJ, Harris SR, Fraser C, Quail MA, Burton J, van der Linden M, McGee L, von Gottberg A,  
673 Song JH, Ko KS, et al. 2011. Rapid pneumococcal evolution in response to clinical interventions.  
674 *Science* 331:430-434.
- 675 Croucher NJ, Kagedan L, Thompson CM, Parkhill J, Bentley SD, Finkelstein JA, Lipsitch M, Hanage WP.  
676 2015. Selective and genetic constraints on pneumococcal serotype switching. *PLoS Genet*  
677 11:e1005095.
- 678 Croucher NJ, Page AJ, Connor TR, Delaney AJ, Keane JA, Bentley SD, Parkhill J, Harris SR. 2015. Rapid  
679 phylogenetic analysis of large samples of recombinant bacterial whole genome sequences using  
680 Gubbins. *Nucleic Acids Res* 43:e15.
- 681 Dai L, Muraoka WT, Wu ZW, Sahin O, Zhang QJ. 2015. A single nucleotide change in mutY increases  
682 the emergence of antibiotic-resistant *Campylobacter jejuni* mutants. *Journal of Antimicrobial*  
683 *Chemotherapy* 70:2739-2748.
- 684 David SS, O'Shea VL, Kundu S. 2007. Base-excision repair of oxidative DNA damage. *Nature* 447:941-  
685 950.
- 686 de Visser JA. 2002. The fate of microbial mutators. *Microbiology* 148:1247-1252.
- 687 Deitsch KW, Moxon ER, Wellems TE. 1997. Shared themes of antigenic variation and virulence in  
688 bacterial, protozoal, and fungal infections. *Microbiol Mol Biol Rev* 61:281-293.
- 689 Denamur E, Lecoindre G, Darlu P, Tenaillon O, Acquaviva C, Sayada C, Sunjevaric I, Rothstein R, Elion  
690 J, Taddei F, et al. 2000. Evolutionary implications of the frequent horizontal transfer of mismatch  
691 repair genes. *Cell* 103:711-721.
- 692 Dupes NM, Walsh BW, Klocko AD, Lenhart JS, Peterson HL, Gessert DA, Pavlick CE, Simmons LA.  
693 2010. Mutations in the *Bacillus subtilis* beta clamp that separate its roles in DNA replication from  
694 mismatch repair. *J Bacteriol* 192:3452-3463.
- 695 Facklam R, Elliott J, Shewmaker L, Reingold A. 2005. Identification and characterization of sporadic  
696 isolates of *Streptococcus iniae* isolated from humans. *Journal of Clinical Microbiology* 43:933-937.
- 697 Ferenci T. 2015. Trade-off Mechanisms Shaping the Diversity of Bacteria. *Trends Microbiol.*
- 698 Fogle CA, Nagle JL, Desai MM. 2008. Clonal interference, multiple mutations and adaptation in large  
699 asexual populations. *Genetics* 180:2163-2173.
- 700 Foster PL. 2007. Stress-induced mutagenesis in bacteria. *Crit Rev Biochem Mol Biol* 42:373-397.
- 701 Fukui K. 2010. DNA mismatch repair in eukaryotes and bacteria. *J Nucleic Acids* 2010.
- 702 Galhardo RS, Hastings PJ, Rosenberg SM. 2007. Mutation as a stress response and the regulation of  
703 evolvability. *Crit Rev Biochem Mol Biol* 42:399-435.
- 704 Geno KA, Gilbert GL, Song JY, Skovsted IC, Klugman KP, Jones C, Konradsen HB, Nahm MH. 2015.  
705 Pneumococcal Capsules and Their Types: Past, Present, and Future. *Clin Microbiol Rev* 28:871-899.
- 706 Giraud A, Matic I, Tenaillon O, Clara A, Radman M, Fons M, Taddei F. 2001. Costs and benefits of high  
707 mutation rates: Adaptive evolution of bacteria in the mouse gut. *Science* 291:2606-2608.
- 708 Gonzalez K, Faustoferri RC, Quivey RG, Jr. 2012. Role of DNA base excision repair in the mutability  
709 and virulence of *Streptococcus mutans*. *Molecular Microbiology* 85:361-377.
- 710 Gould CV, Sniegowski PD, Shchepetov M, Metlay JP, Weiser JN. 2007. Identifying mutator  
711 phenotypes among fluoroquinolone-resistant strains of *Streptococcus pneumoniae* using fluctuation  
712 analysis. *Antimicrob Agents Chemother* 51:3225-3229.
- 713 Gurevich A, Saveliev V, Vyahhi N, Tesler G. 2013. QUAST: quality assessment tool for genome  
714 assemblies. *Bioinformatics* 29:1072-1075.
- 715 Gutierrez O, Juan C, Perez JL, Oliver A. 2004. Lack of association between hypermutation and  
716 antibiotic resistance development in *Pseudomonas aeruginosa* isolates from intensive care unit  
717 patients. *Antimicrob Agents Chemother* 48:3573-3575.

- 718 Hall BM, Ma CX, Liang P, Singh KK. 2009. Fluctuation analysis CalculatOR: a web tool for the  
719 determination of mutation rate using Luria-Delbruck fluctuation analysis. *Bioinformatics* 25:1564-  
720 1565.
- 721 Hall LM, Henderson-Begg SK. 2006. Hypermutable bacteria isolated from humans--a critical analysis.  
722 *Microbiology* 152:2505-2514.
- 723 Hammerschmidt S, Wolff S, Hocke A, Rosseau S, Muller E, Rohde M. 2005. Illustration of  
724 pneumococcal polysaccharide capsule during adherence and invasion of epithelial cells. *Infection*  
725 and *Immunity* 73:4653-4667.
- 726 He Z, Zhang H, Gao S, Lercher MJ, Chen WH, Hu S. 2016. Evolview v2: an online visualization and  
727 management tool for customized and annotated phylogenetic trees. *Nucleic Acids Res* 44:W236-241.
- 728 Healey KR, Zhao Y, Perez WB, Lockhart SR, Sobel JD, Farmakiotis D, Kontoyiannis DP, Sanglard D, Taj-  
729 Aldeen SJ, Alexander BD, et al. 2016. Prevalent mutator genotype identified in fungal pathogen  
730 *Candida glabrata* promotes multi-drug resistance. *Nat Commun* 7:11128.
- 731 Hedges AJ. 2002. Estimating the precision of serial dilutions and viable bacterial counts. *Int J Food*  
732 *Microbiol* 76:207-214.
- 733 Hegde A, Bhat GK, Mallya S. 2008. Effect of exposure to hydrogen peroxide on the virulence of  
734 *Escherichia coli*. *Indian J Med Microbiol* 26:25-28.
- 735 Huson DH, Richter DC, Rausch C, DeZulian T, Franz M, Rupp R. 2007. Dendroscope: An interactive  
736 viewer for large phylogenetic trees. *BMC Bioinformatics* 8:460.
- 737 Kadioglu A, Weiser JN, Paton JC, Andrew PW. 2008. The role of *Streptococcus pneumoniae* virulence  
738 factors in host respiratory colonization and disease. *Nat Rev Microbiol* 6:288-301.
- 739 Kawasaki M, Delamare-Deboutteville J, Bowater RO, Walker MJ, Beatson S, Ben Zakour NL, Barnes  
740 AC. 2018. Microevolution of aquatic *Streptococcus agalactiae* ST-261 from Australia indicates  
741 dissemination via imported tilapia and ongoing adaptation to marine hosts or environment. *Appl*  
742 *Environ Microbiol*.
- 743 Kearse M, Moir R, Wilson A, Stones-Havas S, Cheung M, Sturrock S, Buxton S, Cooper A, Markowitz S,  
744 Duran C, et al. 2012. Geneious Basic: An integrated and extendable desktop software platform for  
745 the organization and analysis of sequence data. *Bioinformatics* 28:1647-1649.
- 746 Korkmaz G, Holm M, Wiens T, Sanyal S. 2014. Comprehensive analysis of stop codon usage in  
747 bacteria and its correlation with release factor abundance. *Journal of Biological Chemistry*  
748 289:30334-30342.
- 749 Labat F, Pradillon O, Garry L, Peuchmaur M, Fantin B, Denamur E. 2005. Mutator phenotype confers  
750 advantage in *Escherichia coli* chronic urinary tract infection pathogenesis. *FEMS Immunol Med*  
751 *Microbiol* 44:317-321.
- 752 Leache AD, Banbury BL, Felsenstein J, de Oca AN, Stamatakis A. 2015. Short Tree, Long Tree, Right  
753 Tree, Wrong Tree: New Acquisition Bias Corrections for Inferring SNP Phylogenies. *Systematic*  
754 *Biology* 64:1032-1047.
- 755 Lenhart JS, Pillon MC, Guarne A, Biteen JS, Simmons LA. 2016. Mismatch repair in Gram-positive  
756 bacteria. *Res Microbiol* 167:4-12.
- 757 Lenhart JS, Sharma A, Hingorani MM, Simmons LA. 2013. DnaN clamp zones provide a platform for  
758 spatiotemporal coupling of mismatch detection to DNA replication. *Mol Microbiol* 87:553-568.
- 759 Letunic I, Bork P. 2018. 20 years of the SMART protein domain annotation resource. *Nucleic Acids*  
760 *Res* 46:D493-D496.
- 761 Li GM. 2008. Mechanisms and functions of DNA mismatch repair. *Cell Research* 18:85-98.
- 762 Locke JB, Colvin KM, Datta AK, Patel SK, Naidu NN, Neely MN, Nizet V, Buchanan JT. 2007.  
763 *Streptococcus iniae* capsule impairs phagocytic clearance and contributes to virulence in fish. *J*  
764 *Bacteriol* 189:1279-1287.
- 765 Locke JB, Colvin KM, Varki N, Vicknair MR, Nizet V, Buchanan JT. 2007. *Streptococcus iniae* beta-  
766 hemolysin streptolysin S is a virulence factor in fish infection. *Diseases of Aquatic Organisms* 76:17-  
767 26.

- 768 Losordo T, DeLong D, Guerdat T. 2009. Advances in technology and practice for land-based  
769 aquaculture systems: tank-based recirculating systems for finfish production. *New Technologies in*  
770 *Aquaculture*:945-983.
- 771 Lu AL, Li X, Gu Y, Wright PM, Chang DY. 2001. Repair of oxidative DNA damage: mechanisms and  
772 functions. *Cell Biochem Biophys* 35:141-170.
- 773 Lukacisinova M, Novak S, Paixao T. 2017. Stress-induced mutagenesis: Stress diversity facilitates the  
774 persistence of mutator genes. *PLoS Comput Biol* 13:e1005609.
- 775 Mackinnon MJ, Read AF. 2004. Virulence in malaria: an evolutionary viewpoint. *Philos Trans R Soc*  
776 *Lond B Biol Sci* 359:965-986.
- 777 Maiden MCJ, van Rensburg MJ, Bray JE, Earle SG, Ford SA, Jolley KA, McCarthy ND. 2013. MLST  
778 revisited: the gene-by-gene approach to bacterial genomics. *Nat Rev Micro* 11:728-736.
- 779 Mao EF, Lane L, Lee J, Miller JH. 1997. Proliferation of mutators in A cell population. *J Bacteriol*  
780 179:417-422.
- 781 Matsushima A, Takakura S, Fujihara N, Saito T, Ito I, Iinuma Y, Ichiyama S. 2010. High prevalence of  
782 mutators among *Enterobacter cloacae* nosocomial isolates and their association with antimicrobial  
783 resistance and repetitive detection. *Clin Microbiol Infect* 16:1488-1493.
- 784 Maurelli AT. 2007. Black holes, antivirulence genes, and gene inactivation in the evolution of  
785 bacterial pathogens. *FEMS Microbiol Lett* 267:1-8.
- 786 Mena A, Macia MD, Borrell N, Moya B, de Francisco T, Perez JL, Oliver A. 2007. Inactivation of the  
787 mismatch repair system in *Pseudomonas aeruginosa* attenuates virulence but favors persistence of  
788 oropharyngeal colonization in cystic fibrosis mice. *J Bacteriol* 189:3665-3668.
- 789 Mena A, Smith EE, Burns JL, Speert DP, Moskowitz SM, Perez JL, Oliver A. 2008. Genetic Adaptation  
790 of *Pseudomonas aeruginosa* to the Airways of Cystic Fibrosis Patients Is Catalyzed by Hypermutation.  
791 *J Bacteriol* 190:7910-7917.
- 792 Merino D, Reglier-Poupet H, Berche P, Charbit A, European Listeria Genome C. 2002. A hypermutator  
793 phenotype attenuates the virulence of *Listeria monocytogenes* in a mouse model. *Molecular*  
794 *Microbiology* 44:877-887.
- 795 Methot PO, Alizon S. 2014. What is a pathogen? Toward a process view of host-parasite interactions.  
796 *Virulence* 5:775-785.
- 797 Metzgar D, Wills C. 2000. Evidence for the adaptive evolution of mutation rates. *Cell* 101:581-584.
- 798 Millard CM, Baiano JC, Chan C, Yuen B, Aviles F, Landos M, Chong RS, Benedict S, Barnes AC. 2012.  
799 Evolution of the capsular operon of *Streptococcus iniae* in response to vaccination. *Appl Environ*  
800 *Microbiol* 78:8219-8226.
- 801 Miller JH. 1996. Spontaneous mutators in bacteria: insights into pathways of mutagenesis and repair.  
802 *Annu Rev Microbiol* 50:625-643.
- 803 Negri MC, Morosini MI, Baquero MR, del Campo R, Blazquez J, Baquero F. 2002. Very low cefotaxime  
804 concentrations select for hypermutable *Streptococcus pneumoniae* populations. *Antimicrob Agents*  
805 *Chemother* 46:528-530.
- 806 Neher RA, Hallatschek O. 2013. Genealogies of rapidly adapting populations. *Proc Natl Acad Sci U S A*  
807 110:437-442.
- 808 Nilsson AI, Kugelberg E, Berg OG, Andersson DI. 2004. Experimental adaptation of *Salmonella*  
809 *typhimurium* to mice. *Genetics* 168:1119-1130.
- 810 Oliver A. 2010. Mutators in cystic fibrosis chronic lung infection: Prevalence, mechanisms, and  
811 consequences for antimicrobial therapy. *Int J Med Microbiol* 300:563-572.
- 812 Oliver A, Mena A. 2010. Bacterial hypermutation in cystic fibrosis, not only for antibiotic resistance.  
813 *Clinical Microbiology and Infection* 16:798-808.
- 814 Petkau A, Stuart-Edwards M, Stothard P, Van Domselaar G. 2010. Interactive microbial genome  
815 visualization with GView. *Bioinformatics* 26:3125-3126.
- 816 Picard B, Duriez P, Gouriou S, Matic I, Denamur E, Taddei H. 2001. Mutator natural *Escherichia coli*  
817 isolates have an unusual virulence phenotype. *Infection and Immunity* 69:9-14.



- 818 Pier GB, Madin SH. 1976. *Streptococcus iniae* sp nov, a beta-hemolytic *Streptococcus* isolated from  
819 an amazon freshwater dolphin, *Inia geoffrensis*. . *International Journal of Systematic Bacteriology*  
820 26:545-553.
- 821 Pier GB, Madin SH, Alnakeeb S. 1978. Isolation and characterisation of a 2nd isolate of *Streptococcus*  
822 *iniae*. *International Journal of Systematic Bacteriology* 28:311-314.
- 823 Rajagopal L. 2009. Understanding the regulation of Group B *Streptococcal* virulence factors. *Future*  
824 *Microbiol* 4:201-221.
- 825 Rajanna C, Ouellette G, Rashid M, Zemla A, Karavis M, Zhou C, Revazishvili T, Redmond B, McNew L,  
826 Bakanidze L, et al. 2013. A strain of *Yersinia pestis* with a mutator phenotype from the Republic of  
827 Georgia. *FEMS Microbiol Lett* 343:113-120.
- 828 Rambaut A, Lam TT, Max Carvalho L, Pybus OG. 2016. Exploring the temporal structure of  
829 heterochronous sequences using TempEst (formerly Path-O-Gen). *Virus Evolution* 2.
- 830 Raynes Y, Sniegowski PD. 2014. Experimental evolution and the dynamics of genomic mutation rate  
831 modifiers. *Heredity (Edinb)* 113:375-380.
- 832 Rissman AI, Mau B, Biehl BS, Darling AE, Glasner JD, Perna NT. 2009. Reordering contigs of draft  
833 genomes using the Mauve Aligner. *Bioinformatics* 25:2071-2073.
- 834 Rodriguez JL, Dalia AB, Weiser JN. 2012. Increased chain length promotes pneumococcal adherence  
835 and colonization. *Infection and Immunity* 80:3454-3459.
- 836 Rosche WA, Foster PL. 2000. Determining mutation rates in bacterial populations. *Methods* 20:4-17.
- 837 Scott J, Thompson-Mayberry P, Lahmamsi S, King CJ, McShan WM. 2008. Phage-associated mutator  
838 phenotype in group A streptococcus. *J Bacteriol* 190:6290-6301.
- 839 Seemann T. 2014. Prokka: rapid prokaryotic genome annotation. *Bioinformatics* 30:2068-2069.
- 840 Shabalina SA, Spiridonov NA, Kashina A. 2013. Sounds of silence: synonymous nucleotides as a key to  
841 biological regulation and complexity. *Nucleic Acids Res* 41:2073-2094.
- 842 Shaver AC, Sniegowski PD. 2003. Spontaneously arising mutL mutators in evolving *Escherichia coli*  
843 populations are the result of changes in repeat length. *J Bacteriol* 185:6076-6082.
- 844 Shrestha S, Bjornstad ON, King AA. 2014. Evolution of acuteness in pathogen metapopulations:  
845 conflicts between "classical" and invasion-persistence trade-offs. *Theor Ecol* 7:299-311.
- 846 Siguier P, Perochon J, Lestrade L, Mahillon J, Chandler M. 2006. ISfinder: the reference centre for  
847 bacterial insertion sequences. *Nucleic Acids Research* 34:D32-D36.
- 848 Smania AM, Segura I, Pezza RJ, Becerra C, Albesa I, Argarana CE. 2004. Emergence of phenotypic  
849 variants upon mismatch repair disruption in *Pseudomonas aeruginosa*. *Microbiology-Sgm* 150:1327-  
850 1338.
- 851 Sniegowski P, Raynes Y. 2013. Mutation Rates: How Low Can You Go? *Current Biology* 23:R147-R149.
- 852 Sprouffske K, Aguilar-Rodriguez J, Sniegowski P, Wagner A. 2018. High mutation rates limit  
853 evolutionary adaptation in *Escherichia coli*. *Plos Genetics* 14:e1007324.
- 854 Stamatakis A. 2014. RAxML version 8: a tool for phylogenetic analysis and post-analysis of large  
855 phylogenies. *Bioinformatics* 30:1312-1313.
- 856 Stich M, Manrubia SC, Lazaro E. 2010. Variable Mutation Rates as an Adaptive Strategy in Replicator  
857 Populations. *PLoS One* 5.
- 858 Sundin GW, Weigand MR. 2007. The microbiology of mutability. *FEMS Microbiol Lett* 277:11-20.
- 859 Symonds MRE, Blomberg SP. 2014. A Primer on Phylogenetic Generalised Least Squares. In:  
860 Garamszegi LZ, editor. *Modern Phylogenetic Comparative Methods and Their Application in*  
861 *Evolutionary Biology: Concepts and Practice*. Berlin, Heidelberg: Springer Berlin Heidelberg. p. 105-  
862 130.
- 863 Taddei F, Radman M, MaynardSmith J, Toupance B, Gouyon PH, Godelle B. 1997. Role of mutator  
864 alleles in adaptive evolution. *Nature* 387:700-702.
- 865 Tham KC, Hermans N, Winterwerp HHK, Cox MM, Wyman C, Kanaar R, Lebbink JHG. 2013. Mismatch  
866 Repair Inhibits Homeologous Recombination via Coordinated Directional Unwinding of Trapped DNA  
867 Structures. *Mol Cell* 51:326-337.

868 Torres-Barcelo C, Cabot G, Oliver A, Buckling A, Maclean RC. 2013. A trade-off between oxidative  
869 stress resistance and DNA repair plays a role in the evolution of elevated mutation rates in bacteria.  
870 Proc Biol Sci 280:20130007.

871 Torres-Barcelo C, Kojadinovic M, Moxon R, MacLean RC. 2015. The SOS response increases bacterial  
872 fitness, but not evolvability, under a sublethal dose of antibiotic. Proc Biol Sci 282:20150885.

873 Treangen TJ, Ondov BD, Koren S, Phillippy AM. 2014. The Harvest suite for rapid core-genome  
874 alignment and visualization of thousands of intraspecific microbial genomes. Genome Biology  
875 15:524.

876 Turrientes MC, Baquero F, Levin BR, Martinez JL, Ripoll A, Gonzalez-Alba JM, Tobes R, Manrique M,  
877 Baquero MR, Rodriguez-Dominguez MJ, et al. 2013. Normal mutation rate variants arise in a Mutator  
878 (Mut S) Escherichia coli population. PLoS One 8:e72963.

879 Umarov RK, Solovyev VV. 2017. Recognition of prokaryotic and eukaryotic promoters using  
880 convolutional deep learning neural networks. PLoS ONE 12.

881 V. Solovyev AS. 2011. Automatic Annotation of Microbial Genomes and Metagenomic Sequences. In:  
882 Metagenomics and its Applications in Agriculture, Biomedicine and Environmental: Nova Science  
883 Publishers. p. 61-78.

884 Verotta D, Haagensen J, Spormann AM, Yang K. 2017. Mathematical Modeling of Biofilm Structures  
885 Using COMSTAT Data. Comput Math Methods Med 2017:7246286.

886 Wang S, Wang Y, Shen J, Wu Y, Wu C. 2013. Polymorphic mutation frequencies in clinical isolates of  
887 Staphylococcus aureus: the role of weak mutators in the development of fluoroquinolone resistance.  
888 FEMS Microbiol Lett 341:13-17.

889 Weinberger DM, Malley R, Lipsitch M. 2011. Serotype replacement in disease after pneumococcal  
890 vaccination. Lancet 378:1962-1973.

891 Weinstein MR, Litt M, Kertesz DA, Wyper P, Rose D, Coulter M, McGeer A, Facklam R, Ostach C,  
892 Willey BM, et al. 1997. Invasive infections due to a fish pathogen, Streptococcus iniae. New England  
893 Journal of Medicine 337:589-594.

894 Wielgoss S, Barrick JE, Tenailon O, Cruveiller S, Chane-Woon-Ming B, Medigue C, Lenski RE,  
895 Schneider D. 2011. Mutation Rate Inferred From Synonymous Substitutions in a Long-Term Evolution  
896 Experiment With Escherichia coli. G3 (Bethesda) 1:183-186.

897 Wielgoss S, Barrick JE, Tenailon O, Wisner MJ, Dittmar WJ, Cruveiller S, Chane-Woon-Ming B,  
898 Medigue C, Lenski RE, Schneider D. 2013. Mutation rate dynamics in a bacterial population reflect  
899 tension between adaptation and genetic load. Proc Natl Acad Sci U S A 110:222-227.

900 Wrands M, Roth JR, Hughes D. 2008. Accumulation of mutants in "aging" bacterial colonies is due to  
901 growth under selection, not stress-induced mutagenesis. Proc Natl Acad Sci U S A 105:11863-11868.

902 Yang H, Miller JH. 2008. Deletion of dnaN1 generates a mutator phenotype in Bacillus anthracis. DNA  
903 Repair (Amst) 7:507-514.

904 Zheng Q. 2015. Methods for comparing mutation rates using fluctuation assay data. Mutat Res  
905 777:20-22.

906 Zheng Q. 2017. rSalvador: An R Package for the Fluctuation Experiment. G3 (Bethesda) 7:3849-3856.

907

908

## 909 **Supporting Information Legends**

910 Supplementary Figure 1. *Streptococcus iniae* pangenome derived from 80 strains, coloured by clade  
911 (clade A-G innermost - outer) showing positions of MMR and OG genes relative to putative  
912 phage/prophage and insertion sequence elements. Phage positions were predicted using Phaster and are  
913 indicated as arcs in the outermost ring (green, complete phage; blue, incomplete phage; red, uncertain).  
914 ISE were located with ISfinder and are indicated directionally in the outermost ring as black arrows.

915 Supplementary Figure 2. Root-to-tip regression analysis (TempEst, (Rambaut, et al. 2016) of branch  
916 lengths from best-fit-rooted tree against time (year of isolation). The tree was derived from alignment of  
917 non-recombinant core-genome SNPs corrected for ascertainment bias in RAxML.

918 Supplementary Figure 3: Alignment of the sequences found upstream from *mutY* gene in QMA0084  
919 (representative of clade B) and QMA0248 (representative of all other analysed *S. iniae* strains) and  
920 predicted changes in transcription pattern produced by 56 bp deletion upstream of *mutY* gene identified  
921 in clade B strains.

922 Supplementary Table 1. 80-by-80 matrix of  $p$  values resulting from pair-wise comparisons of  
923 fluctuation analysis data by Maximum Ratio Test corrected for multiple comparisons by controlling for  
924 the False Discovery Rate (Microsoft Excel spreadsheet available as download).

925 Supplementary Table 2. Results of fluctuation analysis (Microsoft Excel spreadsheet available as  
926 download).

927 Supplementary Table 3. Extended metadata for 80 *Streptococcus iniae* isolates sequenced in the present  
928 study (Microsoft Excel spreadsheet)

929 Supplementary Table 4. Assembly statistics and quality data for 80 *de novo* genome assemblies prepared  
930 in this study (Microsoft Excel spreadsheet).

## 931 **Figures and tables**

932 Figure 1: Unrooted summary phylogram of *Streptococcus iniae* strains based on alignment of core  
933 genome SNPs filtered to remove recombination. Genetic distances were inferred by maximum likelihood  
934 in RAxML and node support is indicated as percentage of 1000 bootstrap replicates. Geographic origin,  
935 time range (year) of isolation, and mutation rate were added manually *post hoc*. All nodes with bootstrap  
936 support below 75% were collapsed. The phylogram is drawn with scale proportionate to genetic distance  
937 except the dashed branch supporting QMA0141, which is depicted at 10% scale. The inset shows the  
938 phylogram structure with QMA0141 branch drawn to the same scale.

939 Figure 2: Cladogram of *Streptococcus iniae* strains derived from the same dataset as Figure 1. Clade, host  
940 species, variants in MMR and OG DNA repair genes, mutation rate phenotype, and phenotypic variants  
941 associated with virulence were annotated with Evolview. Mutation rate ( $\mu$ ) phenotypes, determined by  
942 fluctuation analysis, are depicted as box blots representing upper and lower 95% confidence limits, with  
943 the interface representing mean values. Node support is indicated as percentage of 1000 bootstrap  
944 replicates.

945 Figure 3: Phenotypic variants associated with virulence among *Streptococcus iniae* strains. A) Buoyant  
946 density assay for capsule (CPS) presence, A1: CPS+, A2 CPS- A3: CPS+/- . B) Haemolysis of sheep red blood  
947 cells by agar diffusion B1: +, B2:-. C) Streptococcal chain length C1: normal, C2: Long, C3: short. D) Biofilm  
948 formation in chamber slides determined by confocal microscopy, D1: normal, D2: denser, D3: thicker.

949

950 Table 1. *Streptococcus iniae* strains used in this study. Includes origin details (host species, time, site  
 951 of isolation), phylogenetic affiliation, virulence-associated phenotypes, and mutation rate. Atypical  
 952 places of isolation (hosts, tissues) and deviant phenotypes are in bold.

| Strain  | Clade | Host                           | Year | Location | Capsule             | Hemolysis   | Chains       | Oxidation resistance | Biofilm formation | Mutation rate (10 <sup>-7</sup> ) |
|---------|-------|--------------------------------|------|----------|---------------------|-------------|--------------|----------------------|-------------------|-----------------------------------|
| QMA0071 | A     | <i>Lates calcarifer</i>        | 2000 | QLD      | wildtype            | wildtype    | wildtype     | wildtype             | wildtype          | 0.2041                            |
| QMA0074 | C2    | <i>Lates calcarifer</i>        | 1998 | QLD      | <b>absent</b>       | wildtype    | <b>long</b>  | wildtype             | wildtype          | 0.6579                            |
| QMA0077 | C2    | <i>Lates calcarifer</i>        | 1995 | QLD      | <b>absent</b>       | wildtype    | <b>long</b>  | wildtype             | wildtype          | 0.7067                            |
| QMA0078 | A     | <i>Lates calcarifer</i>        | 2001 | QLD      | wildtype            | wildtype    | wildtype     | wildtype             | wildtype          | 0.2153                            |
| QMA0080 | C1    | <i>Lates calcarifer</i>        | 2004 | WA       | wildtype            | wildtype    | wildtype     | wildtype             | wildtype          | 0.1966                            |
| QMA0082 | C1    | <i>Lates calcarifer</i>        | 2004 | WA       | wildtype            | wildtype    | wildtype     | wildtype             | wildtype          | 0.1761                            |
| QMA0083 | A     | <i>Lates calcarifer</i>        | 2004 | WA       | wildtype            | wildtype    | wildtype     | wildtype             | wildtype          | 0.1894                            |
| QMA0084 | B     | <b><i>Pteropus alecto</i></b>  | 2001 | WA       | wildtype            | <b>weak</b> | wildtype     | wildtype             | wildtype          | 0.7293                            |
| QMA0087 | A     | <i>Lates calcarifer</i>        | 2004 | WA       | wildtype            | wildtype    | wildtype     | wildtype             | wildtype          | 0.1925                            |
| QMA0130 | E2    | <b><i>Homo sapiens</i></b>     | 1995 | Canada   | <b>absent</b>       | wildtype    | wildtype     | wildtype             | wildtype          | 0.468                             |
| QMA0131 | E2    | <b><i>Homo sapiens</i></b>     | 1995 | Canada   | <b>absent</b>       | wildtype    | wildtype     | wildtype             | wildtype          | 0.4488                            |
| QMA0133 | E1    | <b><i>Homo sapiens</i></b>     | 2001 | USA      | <b>absent</b>       | wildtype    | wildtype     | wildtype             | <b>increased</b>  | 0.5539                            |
| QMA0134 | E1    | <b><i>Homo sapiens</i></b>     | 2001 | USA      | <b>differential</b> | wildtype    | wildtype     | wildtype             | <b>increased</b>  | 0.5457                            |
| QMA0135 | E1    | <b><i>Homo sapiens</i></b>     | 2002 | USA      | wildtype            | wildtype    | <b>short</b> | <b>increased</b>     | wildtype          | 0.631                             |
| QMA0137 | E1    | <b><i>Homo sapiens</i></b>     | 2004 | USA      | wildtype            | wildtype    | <b>short</b> | <b>increased</b>     | wildtype          | 0.5495                            |
| QMA0138 | E1    | <b><i>Homo sapiens</i></b>     | 2004 | USA      | wildtype            | wildtype    | <b>short</b> | <b>increased</b>     | wildtype          | 0.5989                            |
| QMA0139 | F     | <i>Fish sp.</i>                | 1996 | Canada   | <b>absent</b>       | wildtype    | wildtype     | wildtype             | wildtype          | 0.4311                            |
| QMA0140 | -     | <b><i>Inia geoffrensis</i></b> | 1976 | USA      | <b>absent</b>       | wildtype    | wildtype     | <b>increased</b>     | <b>increased</b>  | 0.0901                            |
| QMA0141 | -     | <b><i>Inia geoffrensis</i></b> | 1978 | USA      | <b>absent</b>       | wildtype    | wildtype     | <b>increased</b>     | <b>increased</b>  | 1.0884                            |
| QMA0142 | C1    | <i>Lates calcarifer</i>        | 2005 | NT       | wildtype            | wildtype    | wildtype     | wildtype             | wildtype          | 0.2044                            |
| QMA0150 | C1    | <i>Lates calcarifer</i>        | 2005 | NT       | wildtype            | wildtype    | wildtype     | wildtype             | wildtype          | 0.1952                            |
| QMA0155 | A     | <i>Lates calcarifer</i>        | 2005 | NSW RAS  | wildtype            | wildtype    | wildtype     | wildtype             | wildtype          | 0.1493                            |
| QMA0156 | A     | <i>Lates calcarifer</i>        | 2005 | NSW RAS  | wildtype            | wildtype    | wildtype     | wildtype             | wildtype          | 0.1666                            |
| QMA0157 | A     | <i>Lates calcarifer</i>        | 2005 | NSW RAS  | wildtype            | wildtype    | wildtype     | wildtype             | wildtype          | 0.1545                            |
| QMA0158 | A     | <i>Lates calcarifer</i>        | 2006 | SA RAS   | <b>absent</b>       | wildtype    | <b>long</b>  | wildtype             | wildtype          | 0.1678                            |
| QMA0159 | A     | <i>Lates calcarifer</i>        | 2006 | SA RAS   | wildtype            | wildtype    | wildtype     | wildtype             | wildtype          | 0.2054                            |
| QMA0160 | A     | <i>Lates calcarifer</i>        | 1999 | SA RAS   | wildtype            | wildtype    | wildtype     | wildtype             | wildtype          | 0.1481                            |
| QMA0161 | A     | <i>Lates calcarifer</i>        | 2000 | SA RAS   | wildtype            | wildtype    | wildtype     | wildtype             | wildtype          | 0.1742                            |
| QMA0162 | A     | <i>Lates calcarifer</i>        | 2000 | SA RAS   | wildtype            | wildtype    | wildtype     | wildtype             | wildtype          | 0.1718                            |
| QMA0163 | A     | <i>Lates calcarifer</i>        | 2000 | SA RAS   | wildtype            | wildtype    | wildtype     | wildtype             | wildtype          | 0.1523                            |
| QMA0164 | C2    | <i>Lates calcarifer</i>        | 2006 | QLD      | wildtype            | wildtype    | wildtype     | wildtype             | wildtype          | 0.7102                            |
| QMA0165 | C2    | <i>Lates calcarifer</i>        | 2006 | QLD      | wildtype            | wildtype    | wildtype     | wildtype             | wildtype          | 0.6606                            |
| QMA0177 | C1    | <i>Lates calcarifer</i>        | 2006 | NT       | wildtype            | wildtype    | wildtype     | wildtype             | wildtype          | 0.1718                            |
| QMA0180 | C1    | <i>Lates calcarifer</i>        | 2006 | NT       | wildtype            | wildtype    | wildtype     | wildtype             | wildtype          | 0.2011                            |
| QMA0186 | D     | <i>Oncorhynchus mykiss</i>     | 2000 | Israel   | wildtype            | <b>weak</b> | wildtype     | wildtype             | <b>increased</b>  | 0.5135                            |
| QMA0187 | -     | <i>Channa striata</i>          | 1983 | Thailand | <b>absent</b>       | <b>weak</b> | wildtype     | wildtype             | wildtype          | 0.4635                            |
| QMA0188 | D     | <i>Oncorhynchus mykiss</i>     | 1998 | Israel   | wildtype            | <b>weak</b> | wildtype     | wildtype             | <b>increased</b>  | 0.5042                            |
| QMA0189 | D     | <i>Oncorhynchus mykiss</i>     | 1996 | Reunion  | wildtype            | <b>weak</b> | wildtype     | wildtype             | wildtype          | 0.4907                            |

|         |    |                                          |      |          |                     |             |              |                  |                  |        |
|---------|----|------------------------------------------|------|----------|---------------------|-------------|--------------|------------------|------------------|--------|
| QMA0190 | F  | <i>Channa striata</i>                    | 1988 | Thailand | <b>absent</b>       | wildtype    | wildtype     | wildtype         | wildtype         | 0.6413 |
| QMA0191 | C1 | <i>Lates calcarifer</i>                  | 2005 | NT       | wildtype            | wildtype    | wildtype     | wildtype         | wildtype         | 0.1883 |
| QMA0207 | C1 | <i>Lates calcarifer</i>                  | 2006 | NT       | wildtype            | wildtype    | wildtype     | wildtype         | wildtype         | 0.1486 |
| QMA0216 | A  | <i>Lates calcarifer</i>                  | 2007 | QLD      | <b>absent</b>       | wildtype    | <b>long</b>  | wildtype         | wildtype         | 0.1949 |
| QMA0218 | C2 | <i>Lates calcarifer</i>                  | 2007 | QLD      | wildtype            | wildtype    | wildtype     | wildtype         | wildtype         | 0.7093 |
| QMA0220 | A  | <i>Lates calcarifer</i>                  | 2006 | NSW RAS  | wildtype            | wildtype    | wildtype     | wildtype         | wildtype         | 0.2086 |
| QMA0221 | A  | <i>Lates calcarifer</i>                  | 2007 | NSW RAS  | wildtype            | wildtype    | wildtype     | wildtype         | wildtype         | 0.1814 |
| QMA0222 | A  | <i>Lates calcarifer</i>                  | 2006 | SA RAS   | wildtype            | wildtype    | wildtype     | wildtype         | wildtype         | 0.1829 |
| QMA0233 | F  | <i>Lates calcarifer</i> ,<br><b>bone</b> | 2009 | NSW RAS  | <b>absent</b>       | <b>weak</b> | <b>long</b>  | wildtype         | <b>increased</b> | 0.362  |
| QMA0234 | F  | <i>Lates calcarifer</i> ,<br><b>bone</b> | 2009 | NSW RAS  | <b>absent</b>       | <b>weak</b> | <b>long</b>  | wildtype         | <b>increased</b> | 0.354  |
| QMA0235 | F  | <i>Lates calcarifer</i> ,<br><b>bone</b> | 2009 | NSW RAS  | <b>absent</b>       | <b>weak</b> | <b>long</b>  | wildtype         | <b>increased</b> | 0.3496 |
| QMA0236 | F  | <i>Lates calcarifer</i> ,<br><b>bone</b> | 2009 | NSW RAS  | <b>absent</b>       | <b>weak</b> | <b>long</b>  | wildtype         | <b>increased</b> | 0.3413 |
| QMA0244 | A  | <i>Lates calcarifer</i>                  | 2008 | SA RAS   | wildtype            | wildtype    | wildtype     | wildtype         | wildtype         | 0.2101 |
| QMA0245 | A  | <i>Lates calcarifer</i>                  | 2008 | SA RAS   | wildtype            | wildtype    | wildtype     | wildtype         | wildtype         | 0.1988 |
| QMA0246 | A  | <i>Lates calcarifer</i>                  | 2009 | SA RAS   | wildtype            | wildtype    | wildtype     | wildtype         | wildtype         | 0.2149 |
| QMA0247 | A  | <i>Lates calcarifer</i>                  | 2009 | SA RAS   | wildtype            | wildtype    | wildtype     | wildtype         | wildtype         | 0.2059 |
| QMA0248 | A  | <i>Lates calcarifer</i>                  | 2009 | SA RAS   | wildtype            | wildtype    | wildtype     | wildtype         | wildtype         | 0.1893 |
| QMA0249 | F  | <i>Lates calcarifer</i> ,<br><b>bone</b> | 2009 | SA RAS   | <b>differential</b> | <b>weak</b> | <b>long</b>  | wildtype         | <b>increased</b> | 0.3817 |
| QMA0250 | A  | <i>Lates calcarifer</i>                  | 2007 | NSW RAS  | wildtype            | wildtype    | wildtype     | wildtype         | wildtype         | 0.195  |
| QMA0251 | A  | <i>Lates calcarifer</i>                  | 2008 | NSW RAS  | wildtype            | wildtype    | wildtype     | wildtype         | wildtype         | 0.1927 |
| QMA0252 | A  | <i>Lates calcarifer</i>                  | 2008 | NSW RAS  | wildtype            | wildtype    | wildtype     | wildtype         | wildtype         | 0.2006 |
| QMA0253 | F  | <i>Lates calcarifer</i> ,<br><b>bone</b> | 2009 | NSW RAS  | <b>absent</b>       | wildtype    | <b>long</b>  | wildtype         | <b>increased</b> | 0.3555 |
| QMA0254 | F  | <i>Lates calcarifer</i> ,<br><b>bone</b> | 2009 | NSW RAS  | <b>absent</b>       | wildtype    | <b>long</b>  | wildtype         | <b>increased</b> | 0.3712 |
| QMA0258 | A  | <i>Lates calcarifer</i>                  | 2008 | QLD      | wildtype            | wildtype    | wildtype     | wildtype         | wildtype         | 0.1876 |
| QMA0371 | A  | <i>Scortum barcoo</i>                    | 2011 | NSW      | wildtype            | wildtype    | wildtype     | wildtype         | wildtype         | 0.1889 |
| QMA0373 | C2 | <i>Lates calcarifer</i>                  | 2012 | QLD      | wildtype            | wildtype    | wildtype     | wildtype         | wildtype         | 0.6908 |
| QMA0374 | C2 | <i>Lates calcarifer</i>                  | 2012 | QLD      | wildtype            | wildtype    | wildtype     | wildtype         | wildtype         | 0.729  |
| QMA0445 | G  | <i>Oreochromis sp.</i>                   | 1998 | USA      | <b>absent</b>       | wildtype    | wildtype     | wildtype         | wildtype         | 0.2149 |
| QMA0446 | G  | <i>Oreochromis sp.</i>                   | 1998 | USA      | <b>absent</b>       | wildtype    | wildtype     | wildtype         | wildtype         | 0.1687 |
| QMA0447 | E1 | <i>Hybrid striped bass</i>               | 1996 | USA      | wildtype            | wildtype    | <b>short</b> | <b>increased</b> | wildtype         | 0.5902 |
| QMA0448 | E1 | <i>Hybrid striped bass</i>               | 1998 | USA      | wildtype            | wildtype    | <b>short</b> | <b>increased</b> | wildtype         | 0.5529 |
| QMA0457 | A  | <i>Oreochromis sp.</i>                   | 2005 | USA      | wildtype            | wildtype    | wildtype     | wildtype         | wildtype         | 0.1682 |
| QMA0458 | A  | <i>Epalzeorhynchus bicolor</i>           | 2004 | USA      | wildtype            | wildtype    | wildtype     | wildtype         | wildtype         | 0.1778 |
| QMA0462 | B  | <i>Chromobotia macracanthus</i>          | 2005 | USA      | wildtype            | <b>weak</b> | wildtype     | wildtype         | wildtype         | 0.4242 |
| QMA0463 | B  | <i>Chromobotia macracanthus</i>          | 2005 | USA      | wildtype            | <b>weak</b> | wildtype     | wildtype         | wildtype         | 0.414  |
| QMA0466 | E2 | <i>Oreochromis sp.</i>                   | -    | USA      | wildtype            | wildtype    | <b>short</b> | wildtype         | wildtype         | 0.4602 |
| QMA0467 | A  | <i>Epalzeorhynchus frenatum</i>          | 2004 | USA      | wildtype            | wildtype    | wildtype     | wildtype         | wildtype         | 0.1695 |
| QMA0468 | A  | <i>Oreochromis sp.</i>                   | 2005 | USA      | wildtype            | wildtype    | wildtype     | wildtype         | wildtype         | 0.1689 |
| QMA0490 | A  | <i>Oreochromis sp.</i>                   | 2015 | Honduras | wildtype            | wildtype    | wildtype     | wildtype         | wildtype         | 0.1812 |

|         |   |                        |      |          |          |          |          |          |          |        |
|---------|---|------------------------|------|----------|----------|----------|----------|----------|----------|--------|
| QMA0491 | A | <i>Oreochromis sp.</i> | 2015 | Honduras | wildtype | wildtype | wildtype | wildtype | wildtype | 0.2    |
| QMA0492 | A | <i>Oreochromis sp.</i> | 2015 | Honduras | wildtype | wildtype | wildtype | wildtype | wildtype | 0.1849 |
| QMA0493 | A | <i>Oreochromis sp.</i> | 2016 | Honduras | wildtype | wildtype | wildtype | wildtype | wildtype | 0.1987 |

953

954

955 Table 2: Variants in MMR and OG genes found among *S. iniae* isolates. CDS – protein coding sequence,  
 956 BS – predicted binding sites of transcription factors, PROVEAN score – predicted effect of amino acid  
 957 substitutions on the protein function; scores lower than -2 are considered to indicate a deleterious  
 958 effect.

959

| Gene         | Clade | Strains     | Location                                                          | Mutation type          | Nucleotide change                                                                    | Amino acid change | Protein functional domain | PROVEAN score |
|--------------|-------|-------------|-------------------------------------------------------------------|------------------------|--------------------------------------------------------------------------------------|-------------------|---------------------------|---------------|
| <i>mutS</i>  | F     | from bone   | CDS                                                               | SNP                    | G556T                                                                                | Q -> K            | Pfam MutS_II              | -0.635        |
|              | E     | all         | CDS                                                               | SNP                    | T594C                                                                                | -                 | Pfam MutS_II              | n/a           |
| <i>mutL</i>  | F     | from bone   | CDS                                                               | SNP                    | C837A                                                                                | -                 | DNA mis_repair            | n/a           |
|              | F     | all         | CDS                                                               | SNP                    | T955G                                                                                | S -> R            | DNA mis_repair            | -2.050        |
|              | B     | all         | CDS                                                               | SNP                    | C1117T                                                                               | V -> I            | -                         | -0.271        |
|              | F     | QMA0190     | CDS                                                               | SNP                    | A1626T                                                                               | -                 | MutL_C                    | n/a           |
| <i>dnaN</i>  | F     | QMA0139     | promoter, BS of DnaA                                              | SNP                    | C->T<br>116 bp upstream                                                              | n/a               | n/a                       | n/a           |
|              | G     | QMA0187     | promoter, BS of FNR                                               | SNP                    | T->C<br>135 bp upstream                                                              | n/a               | n/a                       | n/a           |
|              | C2    | all strains | CDS                                                               | SNP                    | C977T                                                                                | T -> I            | Pol3Bc                    | -2,216        |
|              | C1    | all strains | stop codon                                                        | SNP                    | T1135C                                                                               | TAA->Q            | n/a                       | -0.005        |
| <i>rnhC</i>  | -     | QMA0187     | CDS                                                               | SNP                    | G778A                                                                                | D -> N            | Pfam: RNase_HII           | -4.593        |
| <i>recD2</i> | -     | QMA0140     | RBS                                                               | SNP                    | A -> G<br>15 bp upstream                                                             | n/a               | n/a                       | n/a           |
|              | E1    | all strains | RBS                                                               | SNP                    | T -> A<br>9 bp upstream                                                              | n/a               | n/a                       | n/a           |
|              | B     | all strains | CDS                                                               | SNP                    | C1605T                                                                               | -                 | -                         | n/a           |
|              | C2    | all strains | CDS                                                               | SNP                    | C1653T                                                                               | -                 | -                         | n/a           |
| <i>mutY</i>  | B     | all strains | promoter, -35 box, 1 <sup>st</sup> bp of -10 box, 2 BSs of RpoD17 | large deletion (56 bp) | atcataagatttcctctat<br>aaatctgtgcatatgcat<br>ccttctttatagtttc<br>247-187 bp upstream | n/a               | n/a                       | n/a           |
|              | F     | all strains | CDS                                                               | SNP                    | T935G                                                                                | I -> T            | Pfam: NUDIX_4             | -2.544        |
| <i>mutM</i>  | D     | all strains | CDS                                                               | SNP                    | T24G                                                                                 | E -> D            | Fapy_DNAglyco             | -2.990        |
| <i>mutX</i>  | E2    | all strains | CDS                                                               | SNP                    | A193G                                                                                | M -> I            | Pfam: NUDIX               | -0.539        |

960

961





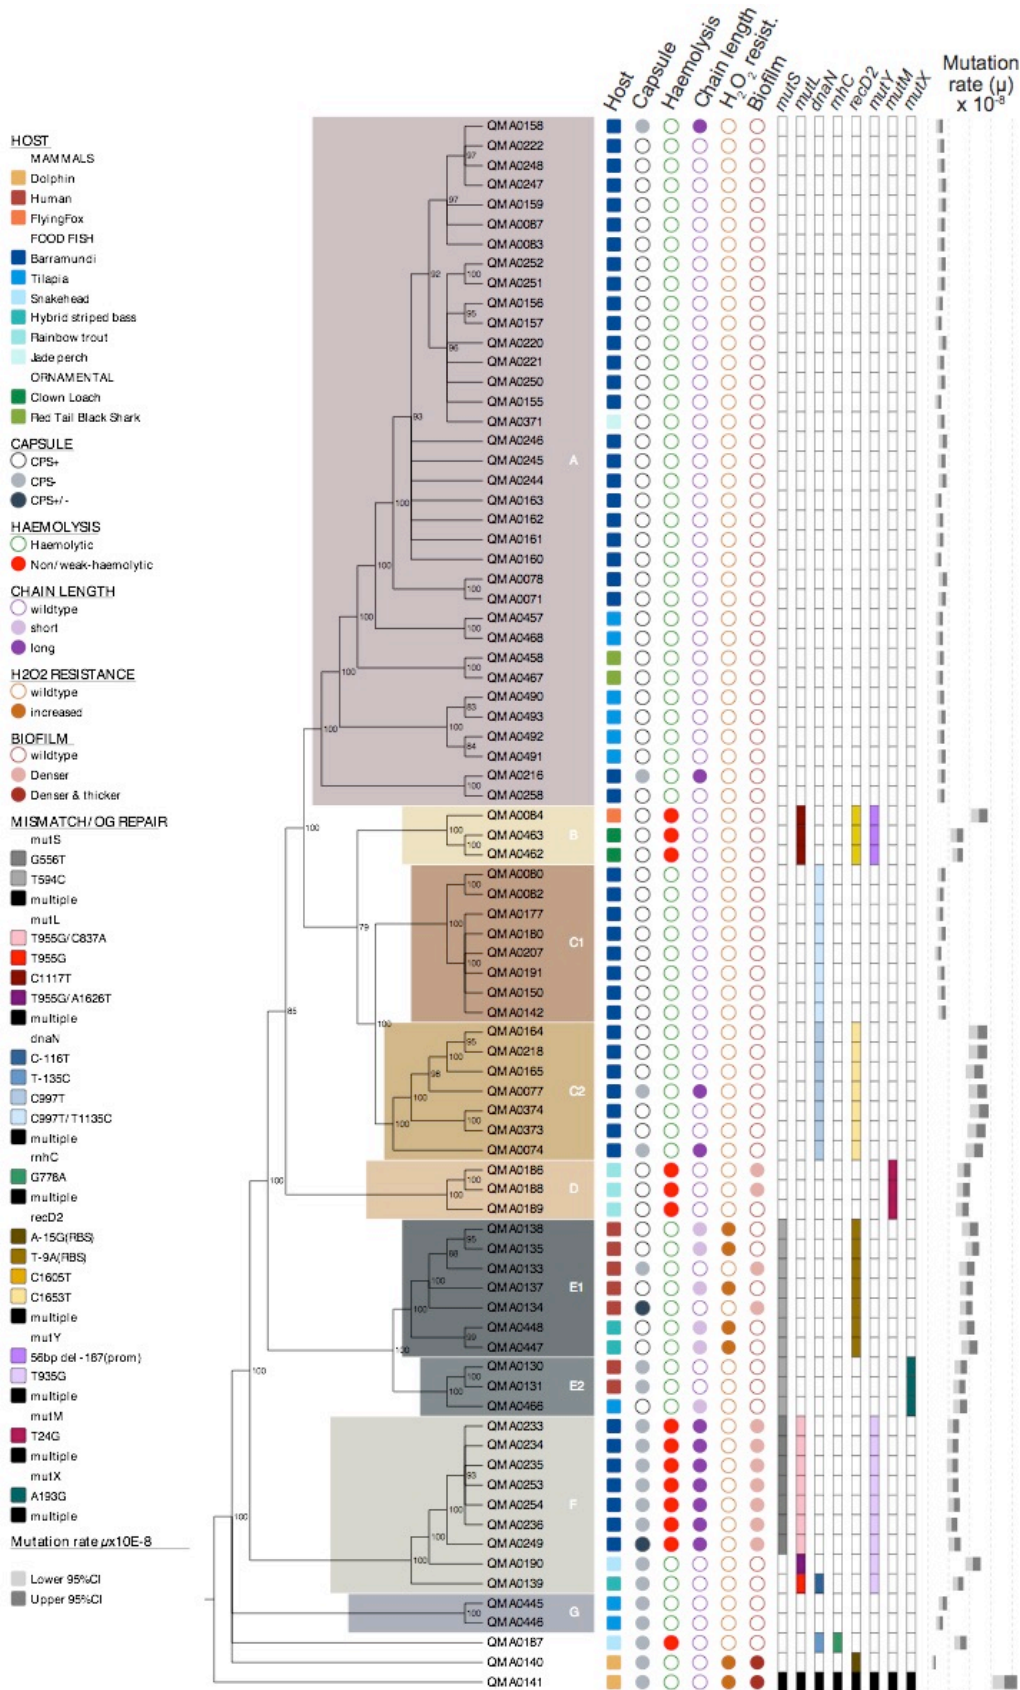

965

966

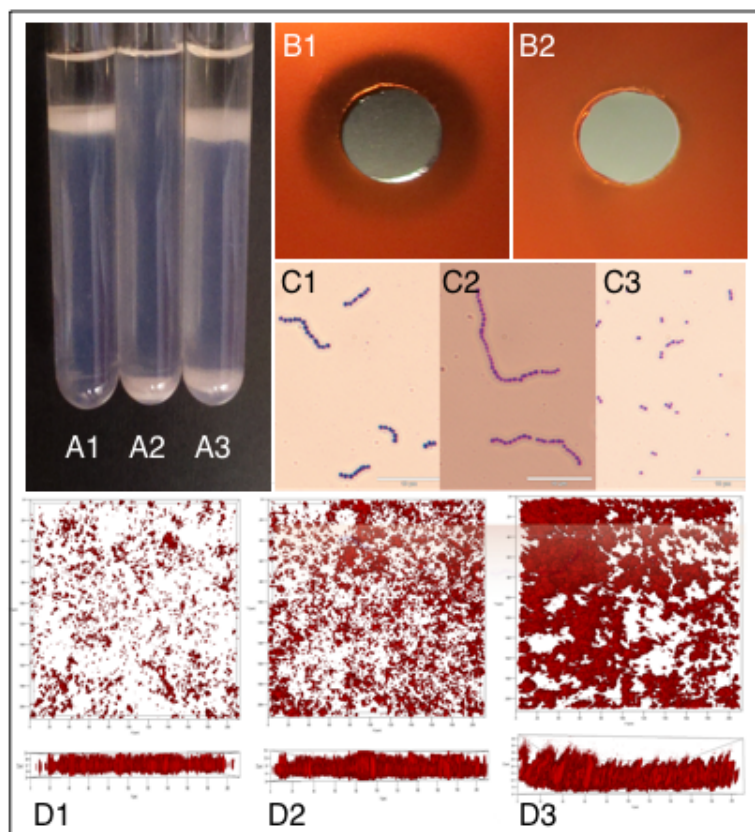

967

968

969 Supplementary Figures

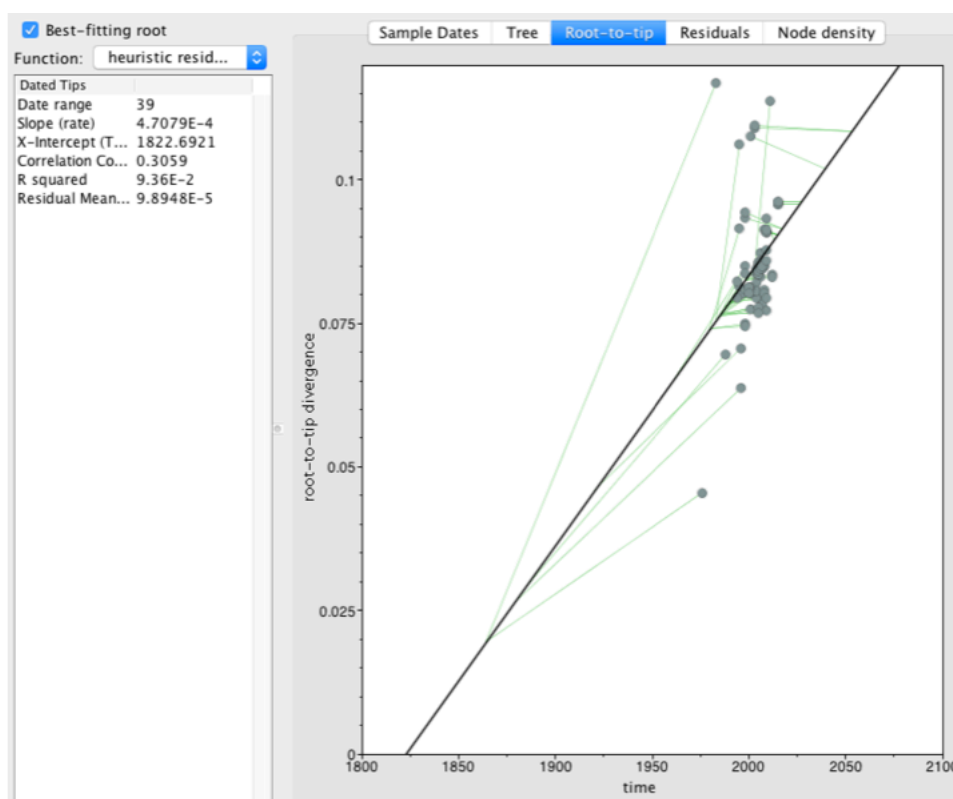

970

971

972

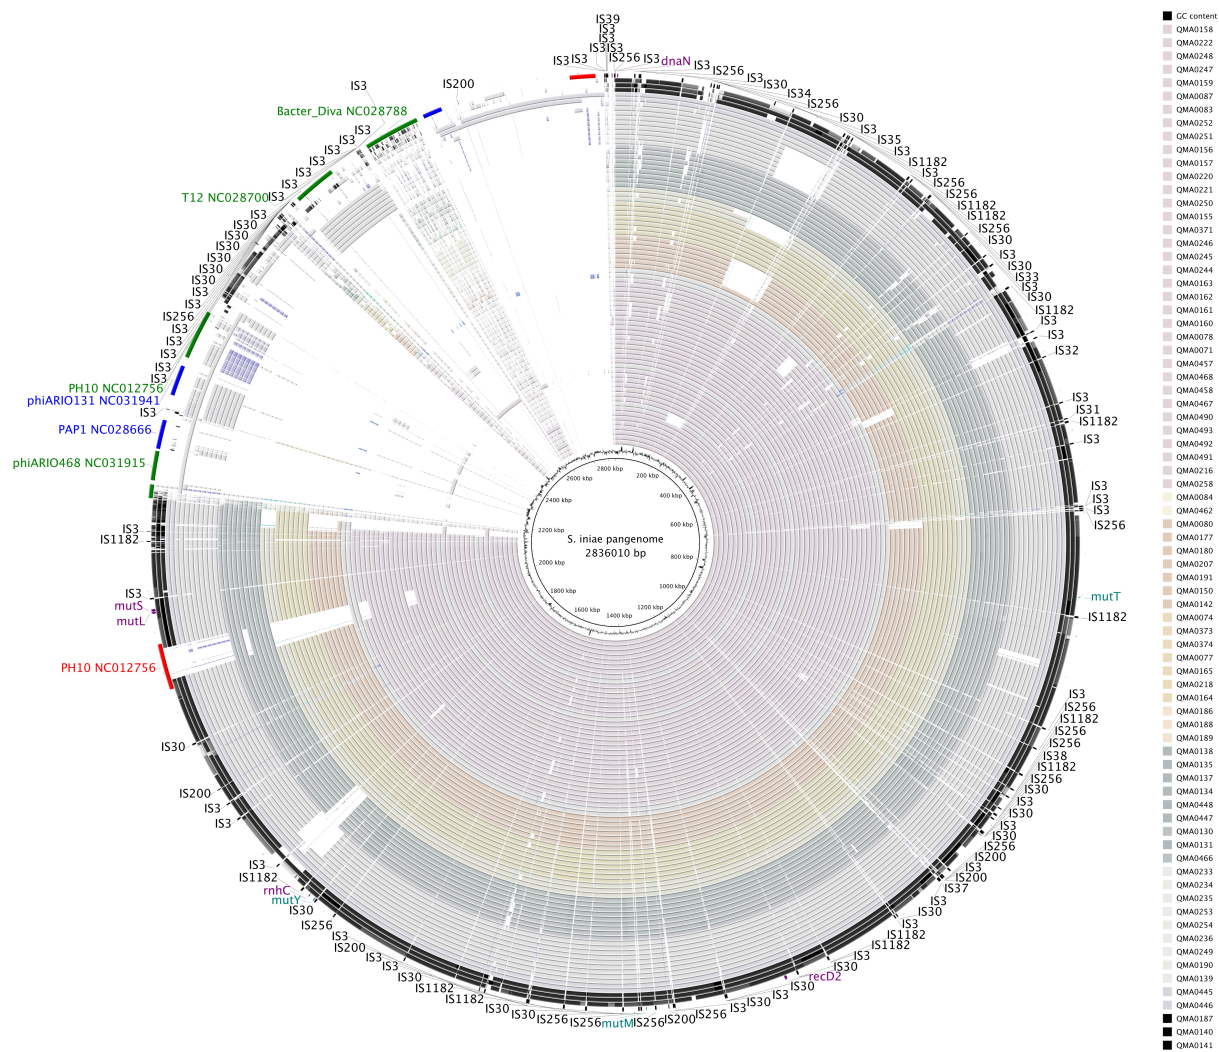

973

974

```

QMA248_500      cagattatgaataactaatctctggaaaaattagtctccattcttgaacgtcctttatt 60
QMA0084_444    cagattatgaataactaatctctggaaaaattagtctccattcttgaacgtcctttatt 60
*****

QMA248_500      gaatttaagcatatactatacctttcaaatatggagatTTTTcAAAacttatactgtaa 120
QMA0084_444    gaatttaagcatatactatacctttcaaatatggagatTTTTcAAAacttatactgtaa 120
*****

QMA248_500      gagcgctcctttggccaaaataacgcatacttcaataagttcaacaatgtgatcactttgt 180
QMA0084_444    gagcgctcctttggccaaaataacgcatacttcaataagttcaacaatgtgatcactttgt 180
*****

QMA248_500      tagttgtaaaagtcagtttgctaccggtgttgagctacttagtctccgttcttgtacc 240
QMA0084_444    tagttgtaaaagtcagtttgctaccggtgttgagctacttagtctccgttcttgtacc 240
*****

QMA248_500      gtgcgacatgtagtttcatcataagatttccctcctataaaatctgtgcatatgtcatcct 300
QMA0084_444    gtgcgacatgtagtttcatcataagatttccctcctataaaatctgtgcatatgtcatcct 257
*****

QMA248_500      tctttatagtttcatataatgtaagcgtttgcttttgcagaAAAAAatattccctat 360
QMA0084_444    -----attataatgtaagcgtttgcttttgcagaAAAAAatattccctat 304
*****

QMA248_500      gacattttccacttgccataaaaaagataagAAAAAAagctgttatcattgttttttg 420
QMA0084_444    gacattttccacttgccataaaaaagataagAAAAAAagctgttatcattgttttttg 364
*****

QMA248_500      aaaactctgatagaagctattattttgactttctagcctagccttttcgcataatgaaaa 480
QMA0084_444    aaaactctgatagaagctattattttgactttctagcctagccttttcgcataatgaaaa 424
*****

QMA248_500      aactttgctacaatagaggt 500
QMA0084_444    aactttgctacaatagaggt 444
*****

```

**BROM prediction:**

> **QMA248\_500**

Length of sequence- 500  
 Threshold for promoters - 0.20

Number of predicted promoters - 1

Promoter Pos: 328 LDF- 7.23  
 10 box at pos. 313 cattataat Score 75  
 35 box at pos. 291 atgtca Score 23

Oligonucleotides from known TF binding sites:

For promoter at 328:  
 rpoD17: TTCCTCCT at position 268 Score - 8  
 rpoD17: GTGCATA at position 284 Score - 7  
 rpoD17: TAATGTAA at position 318 Score - 12  
 galR: TGTAAGCG at position 321 Score - 8  
 rpoD18: TTGCTTTT at position 330 Score - 6  
 rpoD16: TGCAAGA at position 337 Score - 19

> **QMA0084\_444**

Length of sequence- 444  
 Threshold for promoters - 0.20

Number of predicted promoters - 2

Promoter Pos: 362 LDF- 6.79  
 10 box at pos. 347 tgttatcat Score 75  
 35 box at pos. 324 ataaaa Score 7

Promoter Pos: 62 LDF- 3.55  
 10 box at pos. 44 ttgtaacgt Score 38  
 35 box at pos. 23 tggaaa Score 23

Oligonucleotides from known TF binding sites:

For promoter at 362:  
 arcA: AATAAAAA at position 323 Score - 12  
 purR: AATAAAAG at position 324 Score - 11  
 cpxR: TAAAAAGA at position 325 Score - 9  
 rpoD18: ATCATTGT at position 351 Score - 5  
 rpoD19: ATTGTTTT at position 354 Score - 7  
 fnr: TTTTTTGA at position 358 Score - 9

For promoter at 62:  
 lrp: ATAATAA at position 11 Score - 14  
 tus: TAACTAAT at position 12 Score - 17  
 tus: TTGTAACG at position 44 Score - 7  
 rpoD17: ATACTATA at position 73 Score - 11
