# Supplementary material for: Evolutionary epidemiology of Streptococcus iniae: linking mutation rate dynamics with adaptation to novel immunological landscapes
Source: bioRxiv or medRxiv preprint supplement (doi:10.1101/355412), 2020-02-27
Supplement: Supplementary file [file 355412-2.pdf]

| Collection no | Other designation | Biosample Number | Species                    | Host                                  | Isolation date | Geographic location | Received from                     |
|---------------|-------------------|------------------|----------------------------|---------------------------------------|----------------|---------------------|-----------------------------------|
| QMA0071       | 0-43154           | SAMN09104459     | <i>Streptococcus iniae</i> | <i>Lates calcarifer</i>               | 2000           | Australia: QLD      | Ooonooba Veterinary Laboratory    |
| QMA0074       | 98-51343          | SAMN09104460     | <i>Streptococcus iniae</i> | <i>Lates calcarifer</i>               | 1998           | Australia: QLD      | Ooonooba Veterinary Laboratory    |
| QMA0077       | 95-47554          | SAMN09104461     | <i>Streptococcus iniae</i> | <i>Lates calcarifer</i>               | 1995           | Australia: QLD      | Ooonooba Veterinary Laboratory    |
| QMA0078       | 1-41291           | SAMN09104462     | <i>Streptococcus iniae</i> | <i>Lates calcarifer</i>               | 2001           | Australia: QLD      | Ooonooba Veterinary Laboratory    |
| QMA0080       | AS-04-1503#7      | SAMN09104463     | <i>Streptococcus iniae</i> | <i>Lates calcarifer</i>               | 2004           | Australia: WA       | WA Fisheries                      |
| QMA0082       | AS-04-0018#1      | SAMN09104464     | <i>Streptococcus iniae</i> | <i>Lates calcarifer</i>               | 2004           | Australia: WA       | WA Fisheries                      |
| QMA0083       | AS-04-0006#1      | SAMN09104465     | <i>Streptococcus iniae</i> | <i>Lates calcarifer</i>               | 2004           | Australia: WA       | WA Fisheries                      |
| QMA0084       | AS-01-2199#1      | SAMN09104466     | <i>Streptococcus iniae</i> | <i>Pteropus alecto</i>                | 2001           | Australia: WA       | WA Fisheries                      |
| QMA0087       | Lake Argyll 1     | SAMN09104467     | <i>Streptococcus iniae</i> | <i>Lates calcarifer</i>               | 2004           | Australia: WA       | WA Fisheries                      |
| QMA0130       | ss1440            | SAMN09104468     | <i>Streptococcus iniae</i> | <i>Homo sapiens</i>                   | 1995           | Canada              | CDC, Atlanta                      |
| QMA0131       | ss1543            | SAMN09104469     | <i>Streptococcus iniae</i> | <i>Homo sapiens</i>                   | 1995           | Canada              | CDC, Atlanta                      |
| QMA0133       | 4780-01           | SAMN09104470     | <i>Streptococcus iniae</i> | <i>Homo sapiens</i>                   | 2001           | USA                 | CDC, Atlanta                      |
| QMA0134       | 4787-01           | SAMN09104471     | <i>Streptococcus iniae</i> | <i>Homo sapiens</i>                   | 2001           | USA                 | CDC, Atlanta                      |
| QMA0135       | 2388-02           | SAMN09104472     | <i>Streptococcus iniae</i> | <i>Homo sapiens</i>                   | 2002           | USA                 | CDC, Atlanta                      |
| QMA0137       | 105-04            | SAMN09104473     | <i>Streptococcus iniae</i> | <i>Homo sapiens</i>                   | 2004           | USA                 | CDC, Atlanta                      |
| QMA0138       | 4989-04           | SAMN09104474     | <i>Streptococcus iniae</i> | <i>Homo sapiens</i>                   | 2004           | USA                 | CDC, Atlanta                      |
| QMA0139       | 2880-96           | SAMN09104475     | <i>Streptococcus iniae</i> | <i>Fish sp.</i>                       | 1996           | Canada              | CDC, Atlanta                      |
| QMA0140       | ss1056            | SAMN09104476     | <i>Streptococcus iniae</i> | <i>Inia geoffrensis</i>               | 1976           | USA                 | CDC, Atlanta                      |
| QMA0141       | ss1123            | SAMN09104477     | <i>Streptococcus iniae</i> | <i>Inia geoffrensis</i>               | 1978           | USA                 | CDC, Atlanta                      |
| QMA0142       | 05/0430-D         | SAMN09104478     | <i>Streptococcus iniae</i> | <i>Lates calcarifer</i>               | 2005           | Australia: NT       | Berrimah Veterinary Laboratories  |
| QMA0150       | 05/1151-D         | SAMN09104479     | <i>Streptococcus iniae</i> | <i>Lates calcarifer</i>               | 2005           | Australia: NT       | Berrimah Veterinary Laboratories  |
| QMA0155       | 1                 | SAMN09104480     | <i>Streptococcus iniae</i> | <i>Lates calcarifer</i>               | 2005           | Australia: NSW      | Allied Biotechnology Pty LTd      |
| QMA0156       | 2                 | SAMN09104481     | <i>Streptococcus iniae</i> | <i>Lates calcarifer</i>               | 2005           | Australia: NSW      | Allied Biotechnology Pty LTd      |
| QMA0157       | 3                 | SAMN09104482     | <i>Streptococcus iniae</i> | <i>Lates calcarifer</i>               | 2005           | Australia: NSW      | Allied Biotechnology Pty LTd      |
| QMA0158       | 4                 | SAMN09104483     | <i>Streptococcus iniae</i> | <i>Lates calcarifer</i>               | 2006           | Australia: SA       | Allied Biotechnology Pty LTd      |
| QMA0159       | 5                 | SAMN09104484     | <i>Streptococcus iniae</i> | <i>Lates calcarifer</i>               | 2006           | Australia: SA       | Allied Biotechnology Pty LTd      |
| QMA0160       | 6                 | SAMN09104485     | <i>Streptococcus iniae</i> | <i>Lates calcarifer</i>               | 1999           | Australia: SA       | Allied Biotechnology Pty LTd      |
| QMA0161       |                   | SAMN09104486     | <i>Streptococcus iniae</i> | <i>Lates calcarifer</i>               | 2000           | Australia: SA       | Allied Biotechnology Pty LTd      |
| QMA0162       |                   | SAMN09104487     | <i>Streptococcus iniae</i> | <i>Lates calcarifer</i>               | 2000           | Australia: SA       | Allied Biotechnology Pty LTd      |
| QMA0163       |                   | SAMN09104488     | <i>Streptococcus iniae</i> | <i>Lates calcarifer</i>               | 2000           | Australia: SA       | Allied Biotechnology Pty LTd      |
| QMA0164       | 06-40191          | SAMN09104489     | <i>Streptococcus iniae</i> | <i>Lates calcarifer</i>               | 2006           | Australia: QLD      | Ooonooba Veterinary Laboratory    |
| QMA0165       | 06-40593          | SAMN09104490     | <i>Streptococcus iniae</i> | <i>Lates calcarifer</i>               | 2006           | Australia: QLD      | Ooonooba Veterinary Laboratory    |
| QMA0177       | 06/0784-G         | SAMN09104491     | <i>Streptococcus iniae</i> | <i>Lates calcarifer</i>               | 2006           | Australia: NT       | Berrimah Veterinary Laboratories  |
| QMA0180       | 06/0784-M         | SAMN09104492     | <i>Streptococcus iniae</i> | <i>Lates calcarifer</i>               | 2006           | Australia: NT       | Berrimah Veterinary Laboratories  |
| QMA0186       | KFP404            | SAMN09104493     | <i>Streptococcus iniae</i> | <i>Oncorhynchus mykiss</i>            | 2000           | Israel              | Dr Christian Michel, INRA, France |
| QMA0187       | 108-83 (4)        | SAMN09104494     | <i>Streptococcus iniae</i> | <i>Channa striata</i>                 | 1983           | Thailand            | Dr Christian Michel, INRA, France |
| QMA0188       | KFP173            | SAMN09104495     | <i>Streptococcus iniae</i> | <i>Oncorhynchus mykiss</i>            | 1998           | Israel              | Dr Christian Michel, INRA, France |
| QMA0189       | 21-96 (2)         | SAMN09104496     | <i>Streptococcus iniae</i> | <i>Oncorhynchus mykiss</i>            | 1996           | Reunion             | Dr Christian Michel, INRA, France |
| QMA0190       | CII.5b-88         | SAMN09104497     | <i>Streptococcus iniae</i> | <i>Channa striata</i>                 | 1988           | Thailand            | Dr Christian Michel, INRA, France |
| QMA0191       | 05/0409           | SAMN09104498     | <i>Streptococcus iniae</i> | <i>Lates calcarifer</i>               | 2005           | Australia: NT       | Berrimah Veterinary Laboratories  |
| QMA0207       | 06/0064-I         | SAMN09104499     | <i>Streptococcus iniae</i> | <i>Lates calcarifer</i>               | 2006           | Australia: NT       | Berrimah Veterinary Laboratories  |
| QMA0216       | E                 | SAMN09104500     | <i>Streptococcus iniae</i> | <i>Lates calcarifer</i>               | 2007           | Australia: QLD      | Allied Biotechnology Pty LTd      |
| QMA0218       | G                 | SAMN09104501     | <i>Streptococcus iniae</i> | <i>Lates calcarifer</i>               | 2007           | Australia: QLD      | Allied Biotechnology Pty LTd      |
| QMA0220       | I                 | SAMN09104502     | <i>Streptococcus iniae</i> | <i>Lates calcarifer</i>               | 2006           | Australia: NSW      | Allied Biotechnology Pty LTd      |
| QMA0221       | J                 | SAMN09104503     | <i>Streptococcus iniae</i> | <i>Lates calcarifer</i>               | 2007           | Australia: NSW      | Allied Biotechnology Pty LTd      |
| QMA0222       | K                 | SAMN09104504     | <i>Streptococcus iniae</i> | <i>Lates calcarifer</i>               | 2006           | Australia: SA       | Allied Biotechnology Pty LTd      |
| QMA0233       | 1                 | SAMN09104505     | <i>Streptococcus iniae</i> | <i>Lates calcarifer</i>               | 2008           | Australia: NSW      | Allied Biotechnology Pty LTd      |
| QMA0234       | 2                 | SAMN09104506     | <i>Streptococcus iniae</i> | <i>Lates calcarifer</i>               | 2009           | Australia: NSW      | Allied Biotechnology Pty LTd      |
| QMA0235       | 3                 | SAMN09104507     | <i>Streptococcus iniae</i> | <i>Lates calcarifer</i>               | 2009           | Australia: NSW      | Allied Biotechnology Pty LTd      |
| QMA0236       | 4                 | SAMN09104508     | <i>Streptococcus iniae</i> | <i>Lates calcarifer</i>               | 2009           | Australia: NSW      | Allied Biotechnology Pty LTd      |
| QMA0244       | R2                | SAMN09104509     | <i>Streptococcus iniae</i> | <i>Lates calcarifer</i>               | 2008           | Australia: SA       | Allied Biotechnology Pty LTd      |
| QMA0245       | R3                | SAMN09104510     | <i>Streptococcus iniae</i> | <i>Lates calcarifer</i>               | 2008           | Australia: SA       | Allied Biotechnology Pty LTd      |
| QMA0246       | R4                | SAMN09104511     | <i>Streptococcus iniae</i> | <i>Lates calcarifer</i>               | 2009           | Australia: SA       | Allied Biotechnology Pty LTd      |
| QMA0247       | R5                | SAMN09104512     | <i>Streptococcus iniae</i> | <i>Lates calcarifer</i>               | 2009           | Australia: SA       | Allied Biotechnology Pty LTd      |
| QMA0248       | R6                | SAMN09104513     | <i>Streptococcus iniae</i> | <i>Lates calcarifer</i>               | 2009           | Australia: SA       | Allied Biotechnology Pty LTd      |
| QMA0249       | R7                | SAMN09104514     | <i>Streptococcus iniae</i> | <i>Lates calcarifer</i>               | 2009           | Australia: SA       | Allied Biotechnology Pty LTd      |
| QMA0250       | I6                | SAMN09104515     | <i>Streptococcus iniae</i> | <i>Lates calcarifer</i>               | 2007           | Australia: NSW      | Allied Biotechnology Pty LTd      |
| QMA0251       | I7                | SAMN09104516     | <i>Streptococcus iniae</i> | <i>Lates calcarifer</i>               | 2008           | Australia: NSW      | Allied Biotechnology Pty LTd      |
| QMA0252       | I8                | SAMN09104517     | <i>Streptococcus iniae</i> | <i>Lates calcarifer</i>               | 2008           | Australia: NSW      | Allied Biotechnology Pty LTd      |
| QMA0253       | I9                | SAMN09104518     | <i>Streptococcus iniae</i> | <i>Lates calcarifer</i>               | 2009           | Australia: NSW      | Allied Biotechnology Pty LTd      |
| QMA0254       | I10               | SAMN09104519     | <i>Streptococcus iniae</i> | <i>Lates calcarifer</i>               | 2009           | Australia: NSW      | Allied Biotechnology Pty LTd      |
| QMA0258       | MP2               | SAMN09104520     | <i>Streptococcus iniae</i> | <i>Lates calcarifer</i>               | 2008           | Australia: QLD      | Allied Biotechnology Pty LTd      |
| QMA0371       | 140/11            | SAMN09104521     | <i>Streptococcus iniae</i> | <i>Scortum barcoo</i>                 | 2011           | Australia: NSW      | Tréidlia Biovet Pty. Ltd          |
| QMA0373       | P14723.6          | SAMN09104522     | <i>Streptococcus iniae</i> | <i>Lates calcarifer</i>               | 2012           | Australia: QLD      | Tréidlia Biovet Pty. Ltd          |
| QMA0374       | P14723.8          | SAMN09104523     | <i>Streptococcus iniae</i> | <i>Lates calcarifer</i>               | 2012           | Australia: QLD      | Tréidlia Biovet Pty. Ltd          |
| QMA0445       | Si04              | SAMN09104524     | <i>Streptococcus iniae</i> | <i>Oreochromis sp.</i>                | 1998           | USA: Texas          | Novartis Animal Health            |
| QMA0446       | MT2376            | SAMN09104525     | <i>Streptococcus iniae</i> | <i>Oreochromis sp.</i>                | 1998           | USA: Texas          | Novartis Animal Health            |
| QMA0447       | MT2374            | SAMN09104526     | <i>Streptococcus iniae</i> | <i>Morone saxatilis x M. chrysops</i> | 1996           | USA: Maine          | Novartis Animal Health            |
| QMA0448       | MT2378            | SAMN09104527     | <i>Streptococcus iniae</i> | <i>Morone saxatilis x M. chrysops</i> | 1998           | USA: Texas          | Novartis Animal Health            |
| QMA0457       | Si18              | SAMN09104528     | <i>Streptococcus iniae</i> | <i>Oreochromis sp.</i>                | 2005           | USA: Idaho          | Novartis Animal Health            |
| QMA0458       | Si20              | SAMN09104529     | <i>Streptococcus iniae</i> | <i>Epalzeorhynchus bicolor</i>        | 2004           | USA: Florida        | Novartis Animal Health            |
| QMA0462       | Si24              | SAMN09104530     | <i>Streptococcus iniae</i> | <i>Chromobotia macracanthus</i>       | 2005           | USA: Florida        | Novartis Animal Health            |
| QMA0463       | Si25              | SAMN09104531     | <i>Streptococcus iniae</i> | <i>Chromobotia macracanthus</i>       | 2005           | USA: Florida        | Novartis Animal Health            |
| QMA0466       | Si28              | SAMN09104532     | <i>Streptococcus iniae</i> | <i>Oreochromis sp.</i>                | missing        | USA: Idaho          | Novartis Animal Health            |
| QMA0467       | Si29              | SAMN09104533     | <i>Streptococcus iniae</i> | <i>Epalzeorhynchus frenatum</i>       | 2004           | USA: Florida        | Novartis Animal Health            |
| QMA0468       | Si30              | SAMN09104534     | <i>Streptococcus iniae</i> | <i>Oreochromis sp.</i>                | 2005           | USA: Minnesota      | Novartis Animal Health            |
| QMA0490       | SA06              | SAMN09104535     | <i>Streptococcus iniae</i> | <i>Oreochromis sp.</i>                | 2015           | Honduras            | Regal Springs Tilapia             |
| QMA0491       | SA07              | SAMN09104536     | <i>Streptococcus iniae</i> | <i>Oreochromis sp.</i>                | 2015           | Honduras            | Regal Springs Tilapia             |
| QMA0492       | SA08              | SAMN09104537     | <i>Streptococcus iniae</i> | <i>Oreochromis sp.</i>                | 2015           | Honduras            | Regal Springs Tilapia             |
| QMA0493       | SA09              | SAMN09104538     | <i>Streptococcus iniae</i> | <i>Oreochromis sp.</i>                | 2016           | Honduras            | Regal Springs Tilapia             |
