# Supplementary material for: Evolutionary epidemiology of Streptococcus iniae: linking mutation rate dynamics with adaptation to novel immunological landscapes
Source: bioRxiv or medRxiv preprint supplement (doi:10.1101/355412), 2020-02-27
Supplement: Supplementary file [file 355412-3.pdf]

| Assembly | Accession Number | # contigs | Largest contig | Total length | GC (%) | N50   | Coverage |
|----------|------------------|-----------|----------------|--------------|--------|-------|----------|
| QMA0071  | QLSO00000000     | 78        | 113807         | 1960490      | 36.54  | 47258 | 70       |
| QMA0074  | QLSN00000000     | 90        | 114060         | 1988879      | 36.55  | 46257 | 75       |
| QMA0077  | QLSM00000000     | 88        | 113957         | 1989678      | 36.54  | 47212 | 68       |
| QMA0078  | QLSL00000000     | 78        | 113807         | 1961453      | 36.54  | 47302 | 63       |
| QMA0080  | QLSK00000000     | 92        | 113816         | 1960466      | 36.58  | 39635 | 99       |
| QMA0082  | QLSJ00000000     | 103       | 113816         | 1973124      | 36.59  | 39635 | 60       |
| QMA0083  | QLSI00000000     | 100       | 145495         | 2036785      | 36.59  | 48872 | 143      |
| QMA0084  | QLSH00000000     | 79        | 244206         | 2017325      | 36.57  | 46107 | 156      |
| QMA0087  | QLSG00000000     | 80        | 145495         | 2000434      | 36.58  | 47143 | 60       |
| QMA0130  | QLSF00000000     | 79        | 145698         | 1997141      | 36.57  | 48787 | 176      |
| QMA0131  | QLSE00000000     | 77        | 146714         | 1995984      | 36.55  | 48787 | 182      |
| QMA0133  | QLSD00000000     | 94        | 206678         | 2013947      | 36.6   | 50804 | 168      |
| QMA0134  | QLSC00000000     | 78        | 206585         | 1998327      | 36.57  | 51251 | 126      |
| QMA0135  | QLSB00000000     | 77        | 206613         | 1996612      | 36.57  | 50185 | 120      |
| QMA0137  | QLSA00000000     | 79        | 206679         | 1998125      | 36.57  | 48674 | 130      |
| QMA0138  | QLRZ00000000     | 76        | 145698         | 1997111      | 36.59  | 50804 | 126      |
| QMA0139  | QLRY00000000     | 88        | 122959         | 2185272      | 36.59  | 44717 | 120      |
| QMA0140  | QLRX00000000     | 80        | 129206         | 2079333      | 36.46  | 44887 | 128      |
| QMA0141  | QLRW00000000     | 69        | 202528         | 2174028      | 36.34  | 64558 | 161      |
| QMA0142  | QLRV00000000     | 79        | 170545         | 1873102      | 36.5   | 36283 | 112      |
| QMA0150  | QLRU00000000     | 77        | 170479         | 1880573      | 36.54  | 42139 | 68       |
| QMA0155  | QLRT00000000     | 79        | 146417         | 1994355      | 36.54  | 51746 | 128      |
| QMA0156  | QLRS00000000     | 81        | 108283         | 1988499      | 36.52  | 48079 | 132      |
| QMA0157  | QLRR00000000     | 83        | 145495         | 1993093      | 36.56  | 47258 | 72       |
| QMA0158  | QLRQ00000000     | 80        | 145495         | 1993353      | 36.57  | 47262 | 91       |
| QMA0159  | QLRP00000000     | 73        | 145495         | 1991061      | 36.53  | 51215 | 132      |
| QMA0160  | QLRO00000000     | 81        | 145495         | 1988650      | 36.52  | 47212 | 121      |
| QMA0161  | QLRN00000000     | 77        | 145495         | 1996299      | 36.56  | 48872 | 70       |
| QMA0162  | QLRM00000000     | 79        | 145495         | 1995292      | 36.57  | 47258 | 70       |
| QMA0163  | QLRL00000000     | 77        | 145495         | 1993641      | 36.57  | 48550 | 75       |
| QMA0164  | QLRK00000000     | 87        | 114062         | 1987989      | 36.54  | 47212 | 72       |
| QMA0165  | QLRJ00000000     | 89        | 114062         | 1988545      | 36.53  | 46669 | 78       |
| QMA0177  | QLRI00000000     | 81        | 170773         | 1879603      | 36.52  | 42139 | 140      |
| QMA0180  | QLRH00000000     | 80        | 169960         | 1884134      | 36.54  | 42622 | 98       |
| QMA0186  | QLRG00000000     | 73        | 210824         | 1903339      | 36.5   | 47015 | 104      |
| QMA0187  | QLRF00000000     | 79        | 165781         | 2044301      | 36.49  | 48254 | 120      |
| QMA0188  | QLRE00000000     | 71        | 154296         | 1896879      | 36.47  | 48529 | 144      |
| QMA0189  | QLRD00000000     | 74        | 211771         | 1883574      | 36.46  | 47016 | 144      |
| QMA0190  | QLRC00000000     | 88        | 111205         | 2030860      | 36.54  | 46236 | 88       |
| QMA0191  | QLRB00000000     | 79        | 170929         | 1882523      | 36.53  | 42139 | 132      |
| QMA0207  | QLRA00000000     | 81        | 142777         | 1878618      | 36.54  | 42139 | 98       |
| QMA0216  | QLQZ00000000     | 78        | 137049         | 1965106      | 36.54  | 47212 | 81       |
| QMA0218  | QLQY00000000     | 87        | 114062         | 1989588      | 36.53  | 47817 | 105      |
| QMA0220  | QLQX00000000     | 81        | 145495         | 1990891      | 36.54  | 47258 | 91       |
| QMA0221  | QLQW00000000     | 77        | 145495         | 1994241      | 36.56  | 47258 | 104      |
| QMA0222  | QLQV00000000     | 78        | 145495         | 1990796      | 36.56  | 47258 | 104      |
| QMA0233  | QLQU00000000     | 96        | 100462         | 2044133      | 36.63  | 37181 | 108      |

|         |              |     |        |         |       |       |     |
|---------|--------------|-----|--------|---------|-------|-------|-----|
| QMA0234 | QLQT00000000 | 93  | 100734 | 2047858 | 36.64 | 38189 | 60  |
| QMA0235 | QLQS00000000 | 96  | 100879 | 2046848 | 36.63 | 38039 | 60  |
| QMA0236 | QLQR00000000 | 92  | 100000 | 2049063 | 36.65 | 38188 | 135 |
| QMA0244 | QLSP00000000 | 80  | 145495 | 1996827 | 36.58 | 48550 | 70  |
| QMA0245 | QLQQ00000000 | 79  | 145495 | 1997464 | 36.58 | 48427 | 65  |
| QMA0246 | QLQP00000000 | 79  | 145495 | 1997537 | 36.58 | 48550 | 60  |
| QMA0247 | QLQO00000000 | 84  | 145495 | 1992338 | 36.57 | 47258 | 77  |
| QMA0248 | CP022392.1   | 77  | 145495 | 1994521 | 36.56 | 51359 | 117 |
| QMA0249 | QLQN00000000 | 98  | 94661  | 2038042 | 36.64 | 38039 | 65  |
| QMA0250 | QLQM00000000 | 84  | 145495 | 1992393 | 36.52 | 46250 | 130 |
| QMA0251 | QLQL00000000 | 78  | 145495 | 1937737 | 36.52 | 46250 | 77  |
| QMA0252 | QLQK00000000 | 78  | 145495 | 1938644 | 36.52 | 47260 | 70  |
| QMA0253 | QLQJ00000000 | 96  | 100544 | 2047061 | 36.64 | 38047 | 143 |
| QMA0254 | QLQI00000000 | 97  | 100734 | 2046706 | 36.64 | 38047 | 66  |
| QMA0258 | QLQH00000000 | 79  | 137165 | 1957491 | 36.49 | 47212 | 72  |
| QMA0371 | QLQG00000000 | 110 | 113162 | 2211973 | 36.6  | 38190 | 78  |
| QMA0373 | QLQF00000000 | 89  | 114017 | 1990274 | 36.51 | 47729 | 136 |
| QMA0374 | QLQE00000000 | 86  | 114567 | 1988104 | 36.54 | 47729 | 135 |
| QMA0445 | QLQD00000000 | 89  | 167904 | 2264970 | 36.61 | 46597 | 120 |
| QMA0446 | QLQC00000000 | 93  | 167904 | 2263915 | 36.57 | 46597 | 120 |
| QMA0447 | QLQB00000000 | 73  | 206612 | 1960937 | 36.53 | 50804 | 144 |
| QMA0448 | QLQA00000000 | 75  | 206670 | 1994040 | 36.55 | 50183 | 143 |
| QMA0457 | QLPZ00000000 | 87  | 180074 | 2037029 | 36.52 | 47212 | 154 |
| QMA0458 | QLPY00000000 | 80  | 146729 | 1980652 | 36.52 | 48024 | 156 |
| QMA0462 | QLPX00000000 | 87  | 139666 | 1998379 | 36.58 | 45485 | 161 |
| QMA0463 | QLPW00000000 | 100 | 244491 | 1978846 | 36.6  | 44447 | 144 |
| QMA0466 | QLPV00000000 | 82  | 145698 | 1993146 | 36.53 | 46249 | 150 |
| QMA0467 | QLPU00000000 | 75  | 145713 | 1974500 | 36.55 | 48002 | 144 |
| QMA0468 | QLPT00000000 | 90  | 145642 | 2037588 | 36.53 | 47212 | 121 |
| QMA0490 | QLPS00000000 | 78  | 145598 | 1960320 | 36.53 | 46062 | 63  |
| QMA0491 | QLPR00000000 | 82  | 145598 | 1966151 | 36.56 | 46399 | 72  |
| QMA0492 | QLPQ00000000 | 78  | 145598 | 1965383 | 36.56 | 46399 | 70  |
| QMA0493 | QLPP00000000 | 79  | 145598 | 1965971 | 36.56 | 46062 | 77  |
